# Supplementary material for: Detection and characterization of the SARS-CoV-2 lineage B.1.526 in New York
Source: PubMed Central journal article supplement — bioRxiv. 2021 Apr 22:2021.02.14.431043. Preprint. [Version 3] doi: 10.1101/2021.02.14.431043 (PMC8077570; doi:10.1101/2021.02.14.431043), 2021-04-22
Supplement: media-3.pdf [file media-3.pdf]

We gratefully acknowledge the following Authors from the Originating laboratories responsible for obtaining the specimens, as well as the Submitting laboratories where the genome data were generated and shared via GISAID, on which this research is based.

All Submitters of data may be contacted directly via [www.gisaid.org](http://www.gisaid.org)

Authors are sorted alphabetically.

| Accession ID                                                                                                                                                                                                                                                                                                                                                                                                                                                                                                                                                                                                                                                                                                                                                                                                                                                                                                                                                                                                                                                                                                                                                                                                                                                                                                                                                                                                                                                                                                                                                                                                                                                                                                                                                                                                                                                                                                                                                                                                                                                                                                                                                                                                                                                                                                                                                                                                                                                                                                                                                                                                                                                                                                                                                                                                                                                                                                                                                                                                                                                                                                                                                                                                                                                                                                                                                                                                                                                                                                                                                                                                                                                                                                                                                                                                                                                                                                                                                                                                                                                                                                                                                                                                                                                                                                                                                                                                                                                                                                                                                                                                                                                                                                                                                                                                                                                                                                                                                                                                                                                                                                                                                                                                                                                                                                                                                                                                                                                                                                                                                                                                                                                                                                                                                                                           | Originating Laboratory                                                                                    | Submitting Laboratory                                                         | Authors                                                                                                                                                                       |
|--------------------------------------------------------------------------------------------------------------------------------------------------------------------------------------------------------------------------------------------------------------------------------------------------------------------------------------------------------------------------------------------------------------------------------------------------------------------------------------------------------------------------------------------------------------------------------------------------------------------------------------------------------------------------------------------------------------------------------------------------------------------------------------------------------------------------------------------------------------------------------------------------------------------------------------------------------------------------------------------------------------------------------------------------------------------------------------------------------------------------------------------------------------------------------------------------------------------------------------------------------------------------------------------------------------------------------------------------------------------------------------------------------------------------------------------------------------------------------------------------------------------------------------------------------------------------------------------------------------------------------------------------------------------------------------------------------------------------------------------------------------------------------------------------------------------------------------------------------------------------------------------------------------------------------------------------------------------------------------------------------------------------------------------------------------------------------------------------------------------------------------------------------------------------------------------------------------------------------------------------------------------------------------------------------------------------------------------------------------------------------------------------------------------------------------------------------------------------------------------------------------------------------------------------------------------------------------------------------------------------------------------------------------------------------------------------------------------------------------------------------------------------------------------------------------------------------------------------------------------------------------------------------------------------------------------------------------------------------------------------------------------------------------------------------------------------------------------------------------------------------------------------------------------------------------------------------------------------------------------------------------------------------------------------------------------------------------------------------------------------------------------------------------------------------------------------------------------------------------------------------------------------------------------------------------------------------------------------------------------------------------------------------------------------------------------------------------------------------------------------------------------------------------------------------------------------------------------------------------------------------------------------------------------------------------------------------------------------------------------------------------------------------------------------------------------------------------------------------------------------------------------------------------------------------------------------------------------------------------------------------------------------------------------------------------------------------------------------------------------------------------------------------------------------------------------------------------------------------------------------------------------------------------------------------------------------------------------------------------------------------------------------------------------------------------------------------------------------------------------------------------------------------------------------------------------------------------------------------------------------------------------------------------------------------------------------------------------------------------------------------------------------------------------------------------------------------------------------------------------------------------------------------------------------------------------------------------------------------------------------------------------------------------------------------------------------------------------------------------------------------------------------------------------------------------------------------------------------------------------------------------------------------------------------------------------------------------------------------------------------------------------------------------------------------------------------------------------------------------------------------------------------------------------------------|-----------------------------------------------------------------------------------------------------------|-------------------------------------------------------------------------------|-------------------------------------------------------------------------------------------------------------------------------------------------------------------------------|
| EPI_ISL_1001460                                                                                                                                                                                                                                                                                                                                                                                                                                                                                                                                                                                                                                                                                                                                                                                                                                                                                                                                                                                                                                                                                                                                                                                                                                                                                                                                                                                                                                                                                                                                                                                                                                                                                                                                                                                                                                                                                                                                                                                                                                                                                                                                                                                                                                                                                                                                                                                                                                                                                                                                                                                                                                                                                                                                                                                                                                                                                                                                                                                                                                                                                                                                                                                                                                                                                                                                                                                                                                                                                                                                                                                                                                                                                                                                                                                                                                                                                                                                                                                                                                                                                                                                                                                                                                                                                                                                                                                                                                                                                                                                                                                                                                                                                                                                                                                                                                                                                                                                                                                                                                                                                                                                                                                                                                                                                                                                                                                                                                                                                                                                                                                                                                                                                                                                                                                        | Clinical Microbiology Laboratory, NewYork Presbyterian Hospital/Columbia University Irving Medical Center | Uhlemann Laboratory, Columbia University Irving Medical Center                | Medini K. Annavajhala, Anne-Catrin Uhlemann, Hiroshi Mori, David Ho                                                                                                           |
| EPI_ISL_1009188, EPI_ISL_1009189, EPI_ISL_1009190, EPI_ISL_1009192, EPI_ISL_1009193                                                                                                                                                                                                                                                                                                                                                                                                                                                                                                                                                                                                                                                                                                                                                                                                                                                                                                                                                                                                                                                                                                                                                                                                                                                                                                                                                                                                                                                                                                                                                                                                                                                                                                                                                                                                                                                                                                                                                                                                                                                                                                                                                                                                                                                                                                                                                                                                                                                                                                                                                                                                                                                                                                                                                                                                                                                                                                                                                                                                                                                                                                                                                                                                                                                                                                                                                                                                                                                                                                                                                                                                                                                                                                                                                                                                                                                                                                                                                                                                                                                                                                                                                                                                                                                                                                                                                                                                                                                                                                                                                                                                                                                                                                                                                                                                                                                                                                                                                                                                                                                                                                                                                                                                                                                                                                                                                                                                                                                                                                                                                                                                                                                                                                                    | American Esoteric Laboratories                                                                            | Colleen B. Jonsson                                                            | Mariah K. Taylor, Walter Reichard, Jyothi Parvathareddy, Colleen B. Jonsson                                                                                                   |
| EPI_ISL_1009289, EPI_ISL_1009290, EPI_ISL_1009291, EPI_ISL_1009292, EPI_ISL_1009293, EPI_ISL_1009294, EPI_ISL_1009295, EPI_ISL_1009296, EPI_ISL_1009297, EPI_ISL_1009298, EPI_ISL_1009299, EPI_ISL_1009300, EPI_ISL_1009301, EPI_ISL_1009302, EPI_ISL_1009303, EPI_ISL_1009304, EPI_ISL_1009305, EPI_ISL_1009306, EPI_ISL_1009307, EPI_ISL_1009308, EPI_ISL_1009309, EPI_ISL_1009310, EPI_ISL_1009311, EPI_ISL_1009312, EPI_ISL_1009313, EPI_ISL_1009314, EPI_ISL_1009315, EPI_ISL_1009316, EPI_ISL_1009317, EPI_ISL_1009318, EPI_ISL_1009319, EPI_ISL_1009320, EPI_ISL_1009321, EPI_ISL_1009322, EPI_ISL_1009323, EPI_ISL_1009324, EPI_ISL_1009325, EPI_ISL_1009326, EPI_ISL_1009327, EPI_ISL_1009328, EPI_ISL_1009329, EPI_ISL_1009330, EPI_ISL_1009331, EPI_ISL_1009332, EPI_ISL_1009333, EPI_ISL_1009334, EPI_ISL_1009335, EPI_ISL_1009336, EPI_ISL_1009337, EPI_ISL_1009338, EPI_ISL_1009339, EPI_ISL_1009340, EPI_ISL_1009341, EPI_ISL_1009342, EPI_ISL_1009343, EPI_ISL_1009344, EPI_ISL_1009345, EPI_ISL_1009346, EPI_ISL_1009347, EPI_ISL_1009348, EPI_ISL_1009349, EPI_ISL_1009350, EPI_ISL_1009351, EPI_ISL_1009352, EPI_ISL_1009353, EPI_ISL_1009354, EPI_ISL_1009355, EPI_ISL_1009356, EPI_ISL_1009357, EPI_ISL_1009358, EPI_ISL_1009359, EPI_ISL_1009360, EPI_ISL_1009361, EPI_ISL_1009362, EPI_ISL_1009363, EPI_ISL_1009364, EPI_ISL_1009365, EPI_ISL_1009366, EPI_ISL_1009367, EPI_ISL_1009368, EPI_ISL_1009369, EPI_ISL_1009370, EPI_ISL_1009371, EPI_ISL_1009372, EPI_ISL_1009373, EPI_ISL_1009374, EPI_ISL_1009375, EPI_ISL_1009376, EPI_ISL_1009377, EPI_ISL_1009378, EPI_ISL_1009379, EPI_ISL_1009380, EPI_ISL_1009381, EPI_ISL_1009382, EPI_ISL_1009383, EPI_ISL_1009384, EPI_ISL_1009385, EPI_ISL_1009386, EPI_ISL_1009387, EPI_ISL_1009388, EPI_ISL_1009389, EPI_ISL_1009390, EPI_ISL_1009391, EPI_ISL_1009392, EPI_ISL_1009393, EPI_ISL_1009394, EPI_ISL_1009395, EPI_ISL_1009396, EPI_ISL_1009397, EPI_ISL_1009398, EPI_ISL_1009399, EPI_ISL_1009400, EPI_ISL_1009401, EPI_ISL_1009402, EPI_ISL_1009403, EPI_ISL_1009404, EPI_ISL_1009405, EPI_ISL_1009406, EPI_ISL_1009407, EPI_ISL_1009408, EPI_ISL_1009409, EPI_ISL_1009410, EPI_ISL_1009411, EPI_ISL_1009412, EPI_ISL_1009413, EPI_ISL_1009414, EPI_ISL_1009415, EPI_ISL_1009416, EPI_ISL_1009417, EPI_ISL_1009418, EPI_ISL_1009419, EPI_ISL_1009420, EPI_ISL_1009421, EPI_ISL_1009422, EPI_ISL_1009423, EPI_ISL_1009424, EPI_ISL_1009425, EPI_ISL_1009426, EPI_ISL_1009427, EPI_ISL_1009428, EPI_ISL_1009429, EPI_ISL_1009430, EPI_ISL_1009431, EPI_ISL_1009432, EPI_ISL_1009433, EPI_ISL_1009434, EPI_ISL_1009435, EPI_ISL_1009436, EPI_ISL_1009437, EPI_ISL_1009438, EPI_ISL_1009439, EPI_ISL_1009440, EPI_ISL_1009441, EPI_ISL_1009442, EPI_ISL_1009443, EPI_ISL_1009444, EPI_ISL_1009445, EPI_ISL_1009446, EPI_ISL_1009447, EPI_ISL_1009448, EPI_ISL_1009449, EPI_ISL_1009450, EPI_ISL_1009451, EPI_ISL_1009452, EPI_ISL_1009453, EPI_ISL_1009454, EPI_ISL_1009455, EPI_ISL_1009456, EPI_ISL_1009457, EPI_ISL_1009458, EPI_ISL_1009459, EPI_ISL_1009460, EPI_ISL_1009461, EPI_ISL_1009462, EPI_ISL_1009463, EPI_ISL_1009464, EPI_ISL_1009465, EPI_ISL_1009466, EPI_ISL_1009467, EPI_ISL_1009468, EPI_ISL_1009469, EPI_ISL_1009470, EPI_ISL_1009471, EPI_ISL_1009472, EPI_ISL_1009473, EPI_ISL_1009474, EPI_ISL_1009475, EPI_ISL_1009476, EPI_ISL_1009477, EPI_ISL_1009478, EPI_ISL_1009479, EPI_ISL_1009480, EPI_ISL_1009481, EPI_ISL_1009482, EPI_ISL_1009483, EPI_ISL_1009484, EPI_ISL_1009485, EPI_ISL_1009486, EPI_ISL_1009487, EPI_ISL_1009488, EPI_ISL_1009489, EPI_ISL_1009490, EPI_ISL_1009491, EPI_ISL_1009492, EPI_ISL_1009493, EPI_ISL_1009494, EPI_ISL_1009495, EPI_ISL_1009496, EPI_ISL_1009497, EPI_ISL_1009498, EPI_ISL_1009499, EPI_ISL_1009500, EPI_ISL_1009501, EPI_ISL_1009502, EPI_ISL_1009503, EPI_ISL_1009504, EPI_ISL_1009505, EPI_ISL_1009506, EPI_ISL_1009507, EPI_ISL_1009508, EPI_ISL_1009509, EPI_ISL_1009510, EPI_ISL_1009511, EPI_ISL_1009512, EPI_ISL_1009513, EPI_ISL_1009514, EPI_ISL_1009515, EPI_ISL_1009516, EPI_ISL_1009517, EPI_ISL_1009518, EPI_ISL_1009519, EPI_ISL_1009520, EPI_ISL_1009521, EPI_ISL_1009522, EPI_ISL_1009523, EPI_ISL_1009524, EPI_ISL_1009525, EPI_ISL_1009526, EPI_ISL_1009527, EPI_ISL_1009528, EPI_ISL_1009529, EPI_ISL_1009530, EPI_ISL_1009531, EPI_ISL_1009532, EPI_ISL_1009533, EPI_ISL_1009534, EPI_ISL_1009535, EPI_ISL_1009536, EPI_ISL_1009537, EPI_ISL_1009538, EPI_ISL_1009539, EPI_ISL_1009540, EPI_ISL_1009541, EPI_ISL_1009542, EPI_ISL_1009543, EPI_ISL_1009544, EPI_ISL_1009545, EPI_ISL_1009546, EPI_ISL_1009547, EPI_ISL_1009548, EPI_ISL_1009549, EPI_ISL_1009550, EPI_ISL_1009551, EPI_ISL_1009552, EPI_ISL_1009553, EPI_ISL_1009554, EPI_ISL_1009555, EPI_ISL_1009556, EPI_ISL_1009557, EPI_ISL_1009558, EPI_ISL_1009559, EPI_ISL_1009560, EPI_ISL_1009561, EPI_ISL_1009562, EPI_ISL_1009563, EPI_ISL_1009564, EPI_ISL_1009565, EPI_ISL_1009566, EPI_ISL_1009567, EPI_ISL_1009568, EPI_ISL_1009569, EPI_ISL_1009570, EPI_ISL_1009571, EPI_ISL_1009572, EPI_ISL_1009573, EPI_ISL_1009574, EPI_ISL_1009575, EPI_ISL_1009576, EPI_ISL_1009577, EPI_ISL_1009578, EPI_ISL_1009579, EPI_ISL_1009580, EPI_ISL_1009581, EPI_ISL_1009582, EPI_ISL_1009583, EPI_ISL_1009584, EPI_ISL_1009585, EPI_ISL_1009586, EPI_ISL_1009587, EPI_ISL_1009588, EPI_ISL_1009589, EPI_ISL_1009590, EPI_ISL_1009591, EPI_ISL_1009592, EPI_ISL_1009593, EPI_ISL_1009594, EPI_ISL_1009595, EPI_ISL_1009596, EPI_ISL_1009597, EPI_ISL_1009598, EPI_ISL_1009599, EPI_ISL_1009600, EPI_ISL_1009601, EPI_ISL_1009602, EPI_ISL_1009603, EPI_ISL_1009604, EPI_ISL_1009605, EPI_ISL_1009606, EPI_ISL_1009607, EPI_ISL_1009608, EPI_ISL_1009609, EPI_ISL_1009610, EPI_ISL_1009611, EPI_ISL_1009612, EPI_ISL_1009613, EPI_ISL_1009614, EPI_ISL_1009615, EPI_ISL_1009616 | Erie County Public Health (ECPHL)                                                                         | University at Buffalo Genomics and Bioinformatics Core                        | Jonathan Bard, Natalie Lamb, Alyssa Pohlman, Brandon Marzullo, Amanda Boccolucci, Norma Nowak, Donald Yergeau, Jennifer Surtees                                               |
| see above                                                                                                                                                                                                                                                                                                                                                                                                                                                                                                                                                                                                                                                                                                                                                                                                                                                                                                                                                                                                                                                                                                                                                                                                                                                                                                                                                                                                                                                                                                                                                                                                                                                                                                                                                                                                                                                                                                                                                                                                                                                                                                                                                                                                                                                                                                                                                                                                                                                                                                                                                                                                                                                                                                                                                                                                                                                                                                                                                                                                                                                                                                                                                                                                                                                                                                                                                                                                                                                                                                                                                                                                                                                                                                                                                                                                                                                                                                                                                                                                                                                                                                                                                                                                                                                                                                                                                                                                                                                                                                                                                                                                                                                                                                                                                                                                                                                                                                                                                                                                                                                                                                                                                                                                                                                                                                                                                                                                                                                                                                                                                                                                                                                                                                                                                                                              | Columbia University Irving Medical Center                                                                 | Wadsworth Center, New York State Department of Health                         | Kirsten St. George, Daryl M. Lamson, Alexis Russel, Matthew Shudt, Melissa A Leisner, Jonathan Plitnick, Navjot Singh, John Kelly, Erasmus Schneider, Erica Lasek-Nesselquist |
| EPI_ISL_1016013, EPI_ISL_1016014, EPI_ISL_1016015, EPI_ISL_1016016, EPI_ISL_1016017, EPI_ISL_1016018, EPI_ISL_1016019, EPI_ISL_1016020, EPI_ISL_1016021, EPI_ISL_1016022, EPI_ISL_1016023, EPI_ISL_1016024, EPI_ISL_1016025, EPI_ISL_1016026                                                                                                                                                                                                                                                                                                                                                                                                                                                                                                                                                                                                                                                                                                                                                                                                                                                                                                                                                                                                                                                                                                                                                                                                                                                                                                                                                                                                                                                                                                                                                                                                                                                                                                                                                                                                                                                                                                                                                                                                                                                                                                                                                                                                                                                                                                                                                                                                                                                                                                                                                                                                                                                                                                                                                                                                                                                                                                                                                                                                                                                                                                                                                                                                                                                                                                                                                                                                                                                                                                                                                                                                                                                                                                                                                                                                                                                                                                                                                                                                                                                                                                                                                                                                                                                                                                                                                                                                                                                                                                                                                                                                                                                                                                                                                                                                                                                                                                                                                                                                                                                                                                                                                                                                                                                                                                                                                                                                                                                                                                                                                           | NYU Langone Health                                                                                        | Departments of Pathology and Medicine, New York University School of Medicine | Adriana Heguy, Dacia Dimartino, Emily Guzman, Christian Marier, Peter Meyn, Sitharam Ramaswami, Gael Westby, Paul Zappile, Yutong Zhang, Paolo Cotzia, Guiqing Wang           |
| EPI_ISL_1016101, EPI_ISL_1016102, EPI_ISL_1016103, EPI_ISL_1016104, EPI_ISL_1016105, EPI_ISL_1016106, EPI_ISL_1016107, EPI_ISL_1016108, EPI_ISL_1016109, EPI_ISL_1016110                                                                                                                                                                                                                                                                                                                                                                                                                                                                                                                                                                                                                                                                                                                                                                                                                                                                                                                                                                                                                                                                                                                                                                                                                                                                                                                                                                                                                                                                                                                                                                                                                                                                                                                                                                                                                                                                                                                                                                                                                                                                                                                                                                                                                                                                                                                                                                                                                                                                                                                                                                                                                                                                                                                                                                                                                                                                                                                                                                                                                                                                                                                                                                                                                                                                                                                                                                                                                                                                                                                                                                                                                                                                                                                                                                                                                                                                                                                                                                                                                                                                                                                                                                                                                                                                                                                                                                                                                                                                                                                                                                                                                                                                                                                                                                                                                                                                                                                                                                                                                                                                                                                                                                                                                                                                                                                                                                                                                                                                                                                                                                                                                               | URMC LABS                                                                                                 | Wadsworth Center, New York State Department of Health                         | Kirsten St. George, Daryl M. Lamson, Alexis Russel, Matthew Shudt, Melissa A Leisner, Jonathan Plitnick, Navjot Singh, John Kelly, Erasmus Schneider, Erica Lasek-Nesselquist |
| EPI_ISL_1016111, EPI_ISL_1016112, EPI_ISL_1016113, EPI_ISL_1016114, EPI_ISL_1016115, EPI_ISL_1016116, EPI_ISL_1016117                                                                                                                                                                                                                                                                                                                                                                                                                                                                                                                                                                                                                                                                                                                                                                                                                                                                                                                                                                                                                                                                                                                                                                                                                                                                                                                                                                                                                                                                                                                                                                                                                                                                                                                                                                                                                                                                                                                                                                                                                                                                                                                                                                                                                                                                                                                                                                                                                                                                                                                                                                                                                                                                                                                                                                                                                                                                                                                                                                                                                                                                                                                                                                                                                                                                                                                                                                                                                                                                                                                                                                                                                                                                                                                                                                                                                                                                                                                                                                                                                                                                                                                                                                                                                                                                                                                                                                                                                                                                                                                                                                                                                                                                                                                                                                                                                                                                                                                                                                                                                                                                                                                                                                                                                                                                                                                                                                                                                                                                                                                                                                                                                                                                                  | Columbia University Irving Medical Center                                                                 | Wadsworth Center, New York State Department of Health                         | Kirsten St. George, Daryl M. Lamson, Alexis Russel, Matthew Shudt, Melissa A Leisner, Jonathan Plitnick, Navjot Singh, John Kelly, Erasmus Schneider, Erica Lasek-Nesselquist |
| EPI_ISL_1016118, EPI_ISL_1016119, EPI_ISL_1016120, EPI_ISL_1016121, EPI_ISL_1016122, EPI_ISL_1016123, EPI_ISL_1016124, EPI_ISL_1016125, EPI_ISL_1016126                                                                                                                                                                                                                                                                                                                                                                                                                                                                                                                                                                                                                                                                                                                                                                                                                                                                                                                                                                                                                                                                                                                                                                                                                                                                                                                                                                                                                                                                                                                                                                                                                                                                                                                                                                                                                                                                                                                                                                                                                                                                                                                                                                                                                                                                                                                                                                                                                                                                                                                                                                                                                                                                                                                                                                                                                                                                                                                                                                                                                                                                                                                                                                                                                                                                                                                                                                                                                                                                                                                                                                                                                                                                                                                                                                                                                                                                                                                                                                                                                                                                                                                                                                                                                                                                                                                                                                                                                                                                                                                                                                                                                                                                                                                                                                                                                                                                                                                                                                                                                                                                                                                                                                                                                                                                                                                                                                                                                                                                                                                                                                                                                                                | URMC LABS                                                                                                 | Wadsworth Center, New York State Department of Health                         | Kirsten St. George, Daryl M. Lamson, Alexis Russel, Matthew Shudt, Melissa A Leisner, Jonathan Plitnick, Navjot Singh, John Kelly, Erasmus Schneider, Erica Lasek-Nesselquist |
| EPI_ISL_1016127, EPI_ISL_1016128, EPI_ISL_1016129, EPI_ISL_1016130, EPI_ISL_1016131, EPI_ISL_1016132, EPI_ISL_1016133, EPI_ISL_1016134, EPI_ISL_1016135                                                                                                                                                                                                                                                                                                                                                                                                                                                                                                                                                                                                                                                                                                                                                                                                                                                                                                                                                                                                                                                                                                                                                                                                                                                                                                                                                                                                                                                                                                                                                                                                                                                                                                                                                                                                                                                                                                                                                                                                                                                                                                                                                                                                                                                                                                                                                                                                                                                                                                                                                                                                                                                                                                                                                                                                                                                                                                                                                                                                                                                                                                                                                                                                                                                                                                                                                                                                                                                                                                                                                                                                                                                                                                                                                                                                                                                                                                                                                                                                                                                                                                                                                                                                                                                                                                                                                                                                                                                                                                                                                                                                                                                                                                                                                                                                                                                                                                                                                                                                                                                                                                                                                                                                                                                                                                                                                                                                                                                                                                                                                                                                                                                | THE MARY IMOGENE BASSETT HOSPITAL                                                                         | Wadsworth Center, New York State Department of Health                         | Kirsten St. George, Daryl M. Lamson, Alexis Russel, Matthew Shudt, Melissa A Leisner, Jonathan Plitnick, Navjot Singh, John Kelly, Erasmus Schneider, Erica Lasek-Nesselquist |
| EPI_ISL_1016136                                                                                                                                                                                                                                                                                                                                                                                                                                                                                                                                                                                                                                                                                                                                                                                                                                                                                                                                                                                                                                                                                                                                                                                                                                                                                                                                                                                                                                                                                                                                                                                                                                                                                                                                                                                                                                                                                                                                                                                                                                                                                                                                                                                                                                                                                                                                                                                                                                                                                                                                                                                                                                                                                                                                                                                                                                                                                                                                                                                                                                                                                                                                                                                                                                                                                                                                                                                                                                                                                                                                                                                                                                                                                                                                                                                                                                                                                                                                                                                                                                                                                                                                                                                                                                                                                                                                                                                                                                                                                                                                                                                                                                                                                                                                                                                                                                                                                                                                                                                                                                                                                                                                                                                                                                                                                                                                                                                                                                                                                                                                                                                                                                                                                                                                                                                        | NORTHWELL HEALTH LABORATORIES                                                                             | Wadsworth Center, New York State Department of Health                         | Kirsten St. George, Daryl M. Lamson, Alexis Russel, Matthew Shudt, Melissa A Leisner, Jonathan Plitnick, Navjot Singh, John Kelly, Erasmus Schneider, Erica Lasek-Nesselquist |
| EPI_ISL_1016137                                                                                                                                                                                                                                                                                                                                                                                                                                                                                                                                                                                                                                                                                                                                                                                                                                                                                                                                                                                                                                                                                                                                                                                                                                                                                                                                                                                                                                                                                                                                                                                                                                                                                                                                                                                                                                                                                                                                                                                                                                                                                                                                                                                                                                                                                                                                                                                                                                                                                                                                                                                                                                                                                                                                                                                                                                                                                                                                                                                                                                                                                                                                                                                                                                                                                                                                                                                                                                                                                                                                                                                                                                                                                                                                                                                                                                                                                                                                                                                                                                                                                                                                                                                                                                                                                                                                                                                                                                                                                                                                                                                                                                                                                                                                                                                                                                                                                                                                                                                                                                                                                                                                                                                                                                                                                                                                                                                                                                                                                                                                                                                                                                                                                                                                                                                        | THE MARY IMOGENE BASSETT HOSPITAL                                                                         | Wadsworth Center, New York State Department of Health                         | Kirsten St. George, Daryl M. Lamson, Alexis Russel, Matthew Shudt, Melissa A Leisner, Jonathan Plitnick, Navjot Singh, John Kelly, Erasmus Schneider, Erica Lasek-Nesselquist |
| EPI_ISL_1016138                                                                                                                                                                                                                                                                                                                                                                                                                                                                                                                                                                                                                                                                                                                                                                                                                                                                                                                                                                                                                                                                                                                                                                                                                                                                                                                                                                                                                                                                                                                                                                                                                                                                                                                                                                                                                                                                                                                                                                                                                                                                                                                                                                                                                                                                                                                                                                                                                                                                                                                                                                                                                                                                                                                                                                                                                                                                                                                                                                                                                                                                                                                                                                                                                                                                                                                                                                                                                                                                                                                                                                                                                                                                                                                                                                                                                                                                                                                                                                                                                                                                                                                                                                                                                                                                                                                                                                                                                                                                                                                                                                                                                                                                                                                                                                                                                                                                                                                                                                                                                                                                                                                                                                                                                                                                                                                                                                                                                                                                                                                                                                                                                                                                                                                                                                                        | NORTHWELL HEALTH LABORATORIES                                                                             | Wadsworth Center, New York State Department of Health                         | Kirsten St. George, Daryl M. Lamson, Alexis Russel, Matthew Shudt, Melissa A Leisner, Jonathan Plitnick, Navjot Singh, John Kelly, Erasmus Schneider, Erica Lasek-Nesselquist |
| EPI_ISL_1016139                                                                                                                                                                                                                                                                                                                                                                                                                                                                                                                                                                                                                                                                                                                                                                                                                                                                                                                                                                                                                                                                                                                                                                                                                                                                                                                                                                                                                                                                                                                                                                                                                                                                                                                                                                                                                                                                                                                                                                                                                                                                                                                                                                                                                                                                                                                                                                                                                                                                                                                                                                                                                                                                                                                                                                                                                                                                                                                                                                                                                                                                                                                                                                                                                                                                                                                                                                                                                                                                                                                                                                                                                                                                                                                                                                                                                                                                                                                                                                                                                                                                                                                                                                                                                                                                                                                                                                                                                                                                                                                                                                                                                                                                                                                                                                                                                                                                                                                                                                                                                                                                                                                                                                                                                                                                                                                                                                                                                                                                                                                                                                                                                                                                                                                                                                                        | THE MARY IMOGENE BASSETT HOSPITAL                                                                         | Wadsworth Center, New York State Department of Health                         | Kirsten St. George, Daryl M. Lamson, Alexis Russel, Matthew Shudt, Melissa A Leisner, Jonathan Plitnick, Navjot Singh, John Kelly, Erasmus Schneider, Erica Lasek-Nesselquist |
| EPI_ISL_1016140                                                                                                                                                                                                                                                                                                                                                                                                                                                                                                                                                                                                                                                                                                                                                                                                                                                                                                                                                                                                                                                                                                                                                                                                                                                                                                                                                                                                                                                                                                                                                                                                                                                                                                                                                                                                                                                                                                                                                                                                                                                                                                                                                                                                                                                                                                                                                                                                                                                                                                                                                                                                                                                                                                                                                                                                                                                                                                                                                                                                                                                                                                                                                                                                                                                                                                                                                                                                                                                                                                                                                                                                                                                                                                                                                                                                                                                                                                                                                                                                                                                                                                                                                                                                                                                                                                                                                                                                                                                                                                                                                                                                                                                                                                                                                                                                                                                                                                                                                                                                                                                                                                                                                                                                                                                                                                                                                                                                                                                                                                                                                                                                                                                                                                                                                                                        | NORTHWELL HEALTH LABORATORIES                                                                             | Wadsworth Center, New York State Department of Health                         | Kirsten St. George, Daryl M. Lamson, Alexis Russel, Matthew Shudt, Melissa A Leisner, Jonathan Plitnick, Navjot Singh, John Kelly, Erasmus Schneider, Erica Lasek-Nesselquist |
| EPI_ISL_1016141, EPI_ISL_1016142                                                                                                                                                                                                                                                                                                                                                                                                                                                                                                                                                                                                                                                                                                                                                                                                                                                                                                                                                                                                                                                                                                                                                                                                                                                                                                                                                                                                                                                                                                                                                                                                                                                                                                                                                                                                                                                                                                                                                                                                                                                                                                                                                                                                                                                                                                                                                                                                                                                                                                                                                                                                                                                                                                                                                                                                                                                                                                                                                                                                                                                                                                                                                                                                                                                                                                                                                                                                                                                                                                                                                                                                                                                                                                                                                                                                                                                                                                                                                                                                                                                                                                                                                                                                                                                                                                                                                                                                                                                                                                                                                                                                                                                                                                                                                                                                                                                                                                                                                                                                                                                                                                                                                                                                                                                                                                                                                                                                                                                                                                                                                                                                                                                                                                                                                                       | THE MARY IMOGENE BASSETT HOSPITAL                                                                         | Wadsworth Center, New York State Department of Health                         | Kirsten St. George, Daryl M. Lamson, Alexis Russel, Matthew Shudt, Melissa A Leisner, Jonathan Plitnick, Navjot Singh, John Kelly, Erasmus Schneider, Erica Lasek-Nesselquist |



|                                                                                                                                                                                                                                                                                                                                                                                                                                                                                                                                                                                                                                                                                                        |                                                      |                                                                                                    |                                                                                                                                                                                                                                                                                                                                                                                                                                                                                                                                                                                                  |
|--------------------------------------------------------------------------------------------------------------------------------------------------------------------------------------------------------------------------------------------------------------------------------------------------------------------------------------------------------------------------------------------------------------------------------------------------------------------------------------------------------------------------------------------------------------------------------------------------------------------------------------------------------------------------------------------------------|------------------------------------------------------|----------------------------------------------------------------------------------------------------|--------------------------------------------------------------------------------------------------------------------------------------------------------------------------------------------------------------------------------------------------------------------------------------------------------------------------------------------------------------------------------------------------------------------------------------------------------------------------------------------------------------------------------------------------------------------------------------------------|
| EPI_ISL_1016335, EPI_ISL_1016336                                                                                                                                                                                                                                                                                                                                                                                                                                                                                                                                                                                                                                                                       | New York Presbyterian Hospital                       | Wadsworth Center, New York State Department of Health                                              | Kirsten St. George, Daryl M. Lamson, Alexis Russel, Matthew Shudt, Melissa A Leisner, Jonathan Plitnick, Navjot Singh, John Kelly, Erasmus Schneider, Erica Lasek-Nesselquist                                                                                                                                                                                                                                                                                                                                                                                                                    |
| EPI_ISL_1016337, EPI_ISL_1016338                                                                                                                                                                                                                                                                                                                                                                                                                                                                                                                                                                                                                                                                       | MEMORIAL SLOAN KETTERING CANCER CENTER               | Wadsworth Center, New York State Department of Health                                              | Kirsten St. George, Daryl M. Lamson, Alexis Russel, Matthew Shudt, Melissa A Leisner, Jonathan Plitnick, Navjot Singh, John Kelly, Erasmus Schneider, Erica Lasek-Nesselquist                                                                                                                                                                                                                                                                                                                                                                                                                    |
| EPI_ISL_1016339                                                                                                                                                                                                                                                                                                                                                                                                                                                                                                                                                                                                                                                                                        | URMC LABS                                            | Wadsworth Center, New York State Department of Health                                              | Kirsten St. George, Daryl M. Lamson, Alexis Russel, Matthew Shudt, Melissa A Leisner, Jonathan Plitnick, Navjot Singh, John Kelly, Erasmus Schneider, Erica Lasek-Nesselquist                                                                                                                                                                                                                                                                                                                                                                                                                    |
| EPI_ISL_1016340                                                                                                                                                                                                                                                                                                                                                                                                                                                                                                                                                                                                                                                                                        | WESTCHESTER MEDICAL CENTER                           | Wadsworth Center, New York State Department of Health                                              | Kirsten St. George, Daryl M. Lamson, Alexis Russel, Matthew Shudt, Melissa A Leisner, Jonathan Plitnick, Navjot Singh, John Kelly, Erasmus Schneider, Erica Lasek-Nesselquist                                                                                                                                                                                                                                                                                                                                                                                                                    |
| EPI_ISL_1016341                                                                                                                                                                                                                                                                                                                                                                                                                                                                                                                                                                                                                                                                                        | New York Presbyterian Hospital                       | Wadsworth Center, New York State Department of Health                                              | Kirsten St. George, Daryl M. Lamson, Alexis Russel, Matthew Shudt, Melissa A Leisner, Jonathan Plitnick, Navjot Singh, John Kelly, Erasmus Schneider, Erica Lasek-Nesselquist                                                                                                                                                                                                                                                                                                                                                                                                                    |
| EPI_ISL_1016342, EPI_ISL_1016343                                                                                                                                                                                                                                                                                                                                                                                                                                                                                                                                                                                                                                                                       | MEMORIAL SLOAN KETTERING CANCER CENTER               | Wadsworth Center, New York State Department of Health                                              | Kirsten St. George, Daryl M. Lamson, Alexis Russel, Matthew Shudt, Melissa A Leisner, Jonathan Plitnick, Navjot Singh, John Kelly, Erasmus Schneider, Erica Lasek-Nesselquist                                                                                                                                                                                                                                                                                                                                                                                                                    |
| EPI_ISL_1016344, EPI_ISL_1016345, EPI_ISL_1016346                                                                                                                                                                                                                                                                                                                                                                                                                                                                                                                                                                                                                                                      | WESTCHESTER MEDICAL CENTER                           | Wadsworth Center, New York State Department of Health                                              | Kirsten St. George, Daryl M. Lamson, Alexis Russel, Matthew Shudt, Melissa A Leisner, Jonathan Plitnick, Navjot Singh, John Kelly, Erasmus Schneider, Erica Lasek-Nesselquist                                                                                                                                                                                                                                                                                                                                                                                                                    |
| EPI_ISL_1016347, EPI_ISL_1016348, EPI_ISL_1016349, EPI_ISL_1016350, EPI_ISL_1016351, EPI_ISL_1016352, EPI_ISL_1016353, EPI_ISL_1016354, EPI_ISL_1016355, EPI_ISL_1016356, EPI_ISL_1016357, EPI_ISL_1016358, EPI_ISL_1016359, EPI_ISL_1016360, EPI_ISL_1016361, EPI_ISL_1016362, EPI_ISL_1016363, EPI_ISL_1016364                                                                                                                                                                                                                                                                                                                                                                                       | see above                                            | URMC LABS                                                                                          | Wadsworth Center, New York State Department of Health                                                                                                                                                                                                                                                                                                                                                                                                                                                                                                                                            |
| EPI_ISL_1016365                                                                                                                                                                                                                                                                                                                                                                                                                                                                                                                                                                                                                                                                                        | WESTCHESTER MEDICAL CENTER                           | Wadsworth Center, New York State Department of Health                                              | Kirsten St. George, Daryl M. Lamson, Alexis Russel, Matthew Shudt, Melissa A Leisner, Jonathan Plitnick, Navjot Singh, John Kelly, Erasmus Schneider, Erica Lasek-Nesselquist                                                                                                                                                                                                                                                                                                                                                                                                                    |
| EPI_ISL_1016366, EPI_ISL_1016367, EPI_ISL_1016368, EPI_ISL_1016369, EPI_ISL_1016370, EPI_ISL_1016371, EPI_ISL_1016372                                                                                                                                                                                                                                                                                                                                                                                                                                                                                                                                                                                  | New York Presbyterian Hospital                       | Wadsworth Center, New York State Department of Health                                              | Kirsten St. George, Daryl M. Lamson, Alexis Russel, Matthew Shudt, Melissa A Leisner, Jonathan Plitnick, Navjot Singh, John Kelly, Erasmus Schneider, Erica Lasek-Nesselquist                                                                                                                                                                                                                                                                                                                                                                                                                    |
| EPI_ISL_1016373, EPI_ISL_1016374, EPI_ISL_1016375, EPI_ISL_1016376, EPI_ISL_1016377, EPI_ISL_1016378, EPI_ISL_1016379, EPI_ISL_1016380                                                                                                                                                                                                                                                                                                                                                                                                                                                                                                                                                                 | WESTCHESTER MEDICAL CENTER                           | Wadsworth Center, New York State Department of Health                                              | Kirsten St. George, Daryl M. Lamson, Alexis Russel, Matthew Shudt, Melissa A Leisner, Jonathan Plitnick, Navjot Singh, John Kelly, Erasmus Schneider, Erica Lasek-Nesselquist                                                                                                                                                                                                                                                                                                                                                                                                                    |
| EPI_ISL_1016381, EPI_ISL_1016382, EPI_ISL_1016383, EPI_ISL_1016384, EPI_ISL_1016385, EPI_ISL_1016386, EPI_ISL_1016387, EPI_ISL_1016388, EPI_ISL_1016389, EPI_ISL_1016390, EPI_ISL_1016391, EPI_ISL_1016392, EPI_ISL_1016393, EPI_ISL_1016394, EPI_ISL_1016395, EPI_ISL_1016396, EPI_ISL_1016397, EPI_ISL_1016398, EPI_ISL_1016399, EPI_ISL_1016400, EPI_ISL_1016401                                                                                                                                                                                                                                                                                                                                    | see above                                            | New York Presbyterian Hospital                                                                     | Wadsworth Center, New York State Department of Health                                                                                                                                                                                                                                                                                                                                                                                                                                                                                                                                            |
| EPI_ISL_1016402, EPI_ISL_1016403, EPI_ISL_1016404, EPI_ISL_1016405, EPI_ISL_1016406, EPI_ISL_1016407, EPI_ISL_1016408, EPI_ISL_1016409, EPI_ISL_1016410, EPI_ISL_1016411                                                                                                                                                                                                                                                                                                                                                                                                                                                                                                                               | MEMORIAL SLOAN KETTERING CANCER CENTER               | Wadsworth Center, New York State Department of Health                                              | Kirsten St. George, Daryl M. Lamson, Alexis Russel, Matthew Shudt, Melissa A Leisner, Jonathan Plitnick, Navjot Singh, John Kelly, Erasmus Schneider, Erica Lasek-Nesselquist                                                                                                                                                                                                                                                                                                                                                                                                                    |
| EPI_ISL_1016412                                                                                                                                                                                                                                                                                                                                                                                                                                                                                                                                                                                                                                                                                        | STONY BROOK UNIVERSITY HOSPITAL                      | Wadsworth Center, New York State Department of Health                                              | Kirsten St. George, Daryl M. Lamson, Alexis Russel, Matthew Shudt, Melissa A Leisner, Jonathan Plitnick, Navjot Singh, John Kelly, Erasmus Schneider, Erica Lasek-Nesselquist                                                                                                                                                                                                                                                                                                                                                                                                                    |
| EPI_ISL_1016413                                                                                                                                                                                                                                                                                                                                                                                                                                                                                                                                                                                                                                                                                        | NORTHWELL HEALTH LABORATORIES                        | Wadsworth Center, New York State Department of Health                                              | Kirsten St. George, Daryl M. Lamson, Alexis Russel, Matthew Shudt, Melissa A Leisner, Jonathan Plitnick, Navjot Singh, John Kelly, Erasmus Schneider, Erica Lasek-Nesselquist                                                                                                                                                                                                                                                                                                                                                                                                                    |
| EPI_ISL_1016414, EPI_ISL_1016415                                                                                                                                                                                                                                                                                                                                                                                                                                                                                                                                                                                                                                                                       | URMC LABS                                            | Wadsworth Center, New York State Department of Health                                              | Kirsten St. George, Daryl M. Lamson, Alexis Russel, Matthew Shudt, Melissa A Leisner, Jonathan Plitnick, Navjot Singh, John Kelly, Erasmus Schneider, Erica Lasek-Nesselquist                                                                                                                                                                                                                                                                                                                                                                                                                    |
| EPI_ISL_1016416                                                                                                                                                                                                                                                                                                                                                                                                                                                                                                                                                                                                                                                                                        | STONY BROOK UNIVERSITY HOSPITAL                      | Wadsworth Center, New York State Department of Health                                              | Kirsten St. George, Daryl M. Lamson, Alexis Russel, Matthew Shudt, Melissa A Leisner, Jonathan Plitnick, Navjot Singh, John Kelly, Erasmus Schneider, Erica Lasek-Nesselquist                                                                                                                                                                                                                                                                                                                                                                                                                    |
| EPI_ISL_1016417                                                                                                                                                                                                                                                                                                                                                                                                                                                                                                                                                                                                                                                                                        | ALBANY MEDICAL CENTER HOSPITAL CLINICAL LABORATORIES | Wadsworth Center, New York State Department of Health                                              | Kirsten St. George, Daryl M. Lamson, Alexis Russel, Matthew Shudt, Melissa A Leisner, Jonathan Plitnick, Navjot Singh, John Kelly, Erasmus Schneider, Erica Lasek-Nesselquist                                                                                                                                                                                                                                                                                                                                                                                                                    |
| EPI_ISL_1016418, EPI_ISL_1016419, EPI_ISL_1016420, EPI_ISL_1016421, EPI_ISL_1016422, EPI_ISL_1016423, EPI_ISL_1016424, EPI_ISL_1016425, EPI_ISL_1016426, EPI_ISL_1016427, EPI_ISL_1016428, EPI_ISL_1016429, EPI_ISL_1016430, EPI_ISL_1016431, EPI_ISL_1016432, EPI_ISL_1016433, EPI_ISL_1016434, EPI_ISL_1016435, EPI_ISL_1016436, EPI_ISL_1016437, EPI_ISL_1016438, EPI_ISL_1016439, EPI_ISL_1016440, EPI_ISL_1016441, EPI_ISL_1016442, EPI_ISL_1016443, EPI_ISL_1016444, EPI_ISL_1016445, EPI_ISL_1016446, EPI_ISL_1016447, EPI_ISL_1016448, EPI_ISL_1016449, EPI_ISL_1016450, EPI_ISL_1016451, EPI_ISL_1016452, EPI_ISL_1016453, EPI_ISL_1016454, EPI_ISL_1016455, EPI_ISL_1016456, EPI_ISL_1016457 | see above                                            | URMC LABS                                                                                          | Wadsworth Center, New York State Department of Health                                                                                                                                                                                                                                                                                                                                                                                                                                                                                                                                            |
| EPI_ISL_1016458                                                                                                                                                                                                                                                                                                                                                                                                                                                                                                                                                                                                                                                                                        | NORTHWELL HEALTH LABORATORIES                        | Wadsworth Center, New York State Department of Health                                              | Kirsten St. George, Daryl M. Lamson, Alexis Russel, Matthew Shudt, Melissa A Leisner, Jonathan Plitnick, Navjot Singh, John Kelly, Erasmus Schneider, Erica Lasek-Nesselquist                                                                                                                                                                                                                                                                                                                                                                                                                    |
| EPI_ISL_1016459, EPI_ISL_1016460, EPI_ISL_1016461, EPI_ISL_1016462, EPI_ISL_1016463, EPI_ISL_1016464, EPI_ISL_1016465, EPI_ISL_1016466, EPI_ISL_1016467                                                                                                                                                                                                                                                                                                                                                                                                                                                                                                                                                | STONY BROOK UNIVERSITY HOSPITAL                      | Wadsworth Center, New York State Department of Health                                              | Kirsten St. George, Daryl M. Lamson, Alexis Russel, Matthew Shudt, Melissa A Leisner, Jonathan Plitnick, Navjot Singh, John Kelly, Erasmus Schneider, Erica Lasek-Nesselquist                                                                                                                                                                                                                                                                                                                                                                                                                    |
| EPI_ISL_1016468, EPI_ISL_1016469, EPI_ISL_1016470, EPI_ISL_1016471, EPI_ISL_1016472, EPI_ISL_1016473, EPI_ISL_1016474, EPI_ISL_1016475                                                                                                                                                                                                                                                                                                                                                                                                                                                                                                                                                                 | ALBANY MEDICAL CENTER HOSPITAL CLINICAL LABORATORIES | Wadsworth Center, New York State Department of Health                                              | Kirsten St. George, Daryl M. Lamson, Alexis Russel, Matthew Shudt, Melissa A Leisner, Jonathan Plitnick, Navjot Singh, John Kelly, Erasmus Schneider, Erica Lasek-Nesselquist                                                                                                                                                                                                                                                                                                                                                                                                                    |
| EPI_ISL_1016476, EPI_ISL_1016477, EPI_ISL_1016478                                                                                                                                                                                                                                                                                                                                                                                                                                                                                                                                                                                                                                                      | STONY BROOK UNIVERSITY HOSPITAL                      | Wadsworth Center, New York State Department of Health                                              | Kirsten St. George, Daryl M. Lamson, Alexis Russel, Matthew Shudt, Melissa A Leisner, Jonathan Plitnick, Navjot Singh, John Kelly, Erasmus Schneider, Erica Lasek-Nesselquist                                                                                                                                                                                                                                                                                                                                                                                                                    |
| EPI_ISL_1016565, EPI_ISL_1016602, EPI_ISL_1016643                                                                                                                                                                                                                                                                                                                                                                                                                                                                                                                                                                                                                                                      | Helix/Illumina                                       | Respiratory Viruses Branch, Division of Viral Diseases, Centers for Disease Control and Prevention | Peter W. Cook, Dakota Howard, Dhvani Batra, Ben L. Rambo-Martin, Eileen de Feo, Jan Antico, Christine Tran, Matthew Tolentino, Shannon Wickline, Kim Gietzen, Brad Sickler, Jingtiao Liu, Eric Allen, Phil Febbo, Summer Galloway, Nicole L. Washington, Simon White, Geraint Levan, Kelly Schiabor Barrett, Elizabeth Cirulli, Alexandre Bolze, Ary Ascencio, Charlotte Rivera-Garcia, Ryan Cho, Jason Nguyen, Sherry Wang, Jimmy Ramirez, Tyler Cassens, Efrén Sandoval, Magnus Isaksson, William Lee, David Becker, Marc Laurent, James Lu, Clinton R. Paden, Suxiang Tong, Duncan MacCannell |
| EPI_ISL_1017489, EPI_ISL_1017491, EPI_ISL_1017500, EPI_ISL_1017502, EPI_ISL_1017514, EPI_ISL_1017525, EPI_ISL_1017526, EPI_ISL_1017536, EPI_ISL_1017541, EPI_ISL_1017547, EPI_ISL_1017566, EPI_ISL_1017568, EPI_ISL_1017571, EPI_ISL_1017575, EPI_ISL_1017576, EPI_ISL_1017577, EPI_ISL_1017582, EPI_ISL_1017583, EPI_ISL_1017584                                                                                                                                                                                                                                                                                                                                                                      | see above                                            | Murphy Medical Associates                                                                          | Mary Petrone, Joseph Fauver, Caleb Neal, Steven Murphy, Chantal Vogels, Mallery Breban, Annie Watkins, Tara Alpert, Nathan Grubaugh                                                                                                                                                                                                                                                                                                                                                                                                                                                              |
| EPI_ISL_1017969, EPI_ISL_1017970                                                                                                                                                                                                                                                                                                                                                                                                                                                                                                                                                                                                                                                                       | DOHMH PHL                                            | Grubaugh Lab - Yale School of Public Health<br>New York City Public Health Laboratory              | Jade Wang, et al.                                                                                                                                                                                                                                                                                                                                                                                                                                                                                                                                                                                |

|                                                                                                                                                                                                                                                                                                                                                                                                                                                                                                                                                                                                                                                                                                                                                                                                                                                                                                                                                                                                                                                                                                                                                                                                                                                                                                                                                                                                                                                                                                                                                                                                                                                                                                                                                                                                                                                                                                                                                                                                                                                                                                                                                                                                                                                                                                                                                                                                                                                                                                                                                                                                                                                                                                                                                                                                                                                                                                                                                                                                                                                                                                                                                                                                                                                                                                                                                                                                                                                                                                                                                                                                                                                                                                                                                                                                                                                                                                                                                                                                                                                                                                                                                                                                                                                                                                                                                                                                         |                                 |                                                                                                                                            |                                                                                                                                                                              |
|---------------------------------------------------------------------------------------------------------------------------------------------------------------------------------------------------------------------------------------------------------------------------------------------------------------------------------------------------------------------------------------------------------------------------------------------------------------------------------------------------------------------------------------------------------------------------------------------------------------------------------------------------------------------------------------------------------------------------------------------------------------------------------------------------------------------------------------------------------------------------------------------------------------------------------------------------------------------------------------------------------------------------------------------------------------------------------------------------------------------------------------------------------------------------------------------------------------------------------------------------------------------------------------------------------------------------------------------------------------------------------------------------------------------------------------------------------------------------------------------------------------------------------------------------------------------------------------------------------------------------------------------------------------------------------------------------------------------------------------------------------------------------------------------------------------------------------------------------------------------------------------------------------------------------------------------------------------------------------------------------------------------------------------------------------------------------------------------------------------------------------------------------------------------------------------------------------------------------------------------------------------------------------------------------------------------------------------------------------------------------------------------------------------------------------------------------------------------------------------------------------------------------------------------------------------------------------------------------------------------------------------------------------------------------------------------------------------------------------------------------------------------------------------------------------------------------------------------------------------------------------------------------------------------------------------------------------------------------------------------------------------------------------------------------------------------------------------------------------------------------------------------------------------------------------------------------------------------------------------------------------------------------------------------------------------------------------------------------------------------------------------------------------------------------------------------------------------------------------------------------------------------------------------------------------------------------------------------------------------------------------------------------------------------------------------------------------------------------------------------------------------------------------------------------------------------------------------------------------------------------------------------------------------------------------------------------------------------------------------------------------------------------------------------------------------------------------------------------------------------------------------------------------------------------------------------------------------------------------------------------------------------------------------------------------------------------------------------------------------------------------------------------------|---------------------------------|--------------------------------------------------------------------------------------------------------------------------------------------|------------------------------------------------------------------------------------------------------------------------------------------------------------------------------|
| EPI_ISL_1017971, EPI_ISL_1017972, EPI_ISL_1017973                                                                                                                                                                                                                                                                                                                                                                                                                                                                                                                                                                                                                                                                                                                                                                                                                                                                                                                                                                                                                                                                                                                                                                                                                                                                                                                                                                                                                                                                                                                                                                                                                                                                                                                                                                                                                                                                                                                                                                                                                                                                                                                                                                                                                                                                                                                                                                                                                                                                                                                                                                                                                                                                                                                                                                                                                                                                                                                                                                                                                                                                                                                                                                                                                                                                                                                                                                                                                                                                                                                                                                                                                                                                                                                                                                                                                                                                                                                                                                                                                                                                                                                                                                                                                                                                                                                                                       | DOHMH Riverside                 | New York City Public Health Laboratory                                                                                                     | Jade Wang, et al.                                                                                                                                                            |
| EPI_ISL_1017974                                                                                                                                                                                                                                                                                                                                                                                                                                                                                                                                                                                                                                                                                                                                                                                                                                                                                                                                                                                                                                                                                                                                                                                                                                                                                                                                                                                                                                                                                                                                                                                                                                                                                                                                                                                                                                                                                                                                                                                                                                                                                                                                                                                                                                                                                                                                                                                                                                                                                                                                                                                                                                                                                                                                                                                                                                                                                                                                                                                                                                                                                                                                                                                                                                                                                                                                                                                                                                                                                                                                                                                                                                                                                                                                                                                                                                                                                                                                                                                                                                                                                                                                                                                                                                                                                                                                                                                         | DOHMH Morrisania                | New York City Public Health Laboratory                                                                                                     | Jade Wang, et al.                                                                                                                                                            |
| EPI_ISL_1017975                                                                                                                                                                                                                                                                                                                                                                                                                                                                                                                                                                                                                                                                                                                                                                                                                                                                                                                                                                                                                                                                                                                                                                                                                                                                                                                                                                                                                                                                                                                                                                                                                                                                                                                                                                                                                                                                                                                                                                                                                                                                                                                                                                                                                                                                                                                                                                                                                                                                                                                                                                                                                                                                                                                                                                                                                                                                                                                                                                                                                                                                                                                                                                                                                                                                                                                                                                                                                                                                                                                                                                                                                                                                                                                                                                                                                                                                                                                                                                                                                                                                                                                                                                                                                                                                                                                                                                                         | DOHMH Corona                    | New York City Public Health Laboratory                                                                                                     | Jade Wang, et al.                                                                                                                                                            |
| EPI_ISL_1017976, EPI_ISL_1017977                                                                                                                                                                                                                                                                                                                                                                                                                                                                                                                                                                                                                                                                                                                                                                                                                                                                                                                                                                                                                                                                                                                                                                                                                                                                                                                                                                                                                                                                                                                                                                                                                                                                                                                                                                                                                                                                                                                                                                                                                                                                                                                                                                                                                                                                                                                                                                                                                                                                                                                                                                                                                                                                                                                                                                                                                                                                                                                                                                                                                                                                                                                                                                                                                                                                                                                                                                                                                                                                                                                                                                                                                                                                                                                                                                                                                                                                                                                                                                                                                                                                                                                                                                                                                                                                                                                                                                        | DOHMH Jamaica                   | New York City Public Health Laboratory                                                                                                     | Jade Wang, et al.                                                                                                                                                            |
| EPI_ISL_1017978                                                                                                                                                                                                                                                                                                                                                                                                                                                                                                                                                                                                                                                                                                                                                                                                                                                                                                                                                                                                                                                                                                                                                                                                                                                                                                                                                                                                                                                                                                                                                                                                                                                                                                                                                                                                                                                                                                                                                                                                                                                                                                                                                                                                                                                                                                                                                                                                                                                                                                                                                                                                                                                                                                                                                                                                                                                                                                                                                                                                                                                                                                                                                                                                                                                                                                                                                                                                                                                                                                                                                                                                                                                                                                                                                                                                                                                                                                                                                                                                                                                                                                                                                                                                                                                                                                                                                                                         | DOHMH Chelsea                   | New York City Public Health Laboratory                                                                                                     | Jade Wang, et al.                                                                                                                                                            |
| EPI_ISL_1017979                                                                                                                                                                                                                                                                                                                                                                                                                                                                                                                                                                                                                                                                                                                                                                                                                                                                                                                                                                                                                                                                                                                                                                                                                                                                                                                                                                                                                                                                                                                                                                                                                                                                                                                                                                                                                                                                                                                                                                                                                                                                                                                                                                                                                                                                                                                                                                                                                                                                                                                                                                                                                                                                                                                                                                                                                                                                                                                                                                                                                                                                                                                                                                                                                                                                                                                                                                                                                                                                                                                                                                                                                                                                                                                                                                                                                                                                                                                                                                                                                                                                                                                                                                                                                                                                                                                                                                                         | DOHMH PHL                       | New York City Public Health Laboratory                                                                                                     | Jade Wang, et al.                                                                                                                                                            |
| EPI_ISL_1017980, EPI_ISL_1017981                                                                                                                                                                                                                                                                                                                                                                                                                                                                                                                                                                                                                                                                                                                                                                                                                                                                                                                                                                                                                                                                                                                                                                                                                                                                                                                                                                                                                                                                                                                                                                                                                                                                                                                                                                                                                                                                                                                                                                                                                                                                                                                                                                                                                                                                                                                                                                                                                                                                                                                                                                                                                                                                                                                                                                                                                                                                                                                                                                                                                                                                                                                                                                                                                                                                                                                                                                                                                                                                                                                                                                                                                                                                                                                                                                                                                                                                                                                                                                                                                                                                                                                                                                                                                                                                                                                                                                        | DOHMH Morrisania                | New York City Public Health Laboratory                                                                                                     | Jade Wang, et al.                                                                                                                                                            |
| EPI_ISL_1017982, EPI_ISL_1017983, EPI_ISL_1017984, EPI_ISL_1017985                                                                                                                                                                                                                                                                                                                                                                                                                                                                                                                                                                                                                                                                                                                                                                                                                                                                                                                                                                                                                                                                                                                                                                                                                                                                                                                                                                                                                                                                                                                                                                                                                                                                                                                                                                                                                                                                                                                                                                                                                                                                                                                                                                                                                                                                                                                                                                                                                                                                                                                                                                                                                                                                                                                                                                                                                                                                                                                                                                                                                                                                                                                                                                                                                                                                                                                                                                                                                                                                                                                                                                                                                                                                                                                                                                                                                                                                                                                                                                                                                                                                                                                                                                                                                                                                                                                                      | DOHMH Central Harlem            | New York City Public Health Laboratory                                                                                                     | Jade Wang, et al.                                                                                                                                                            |
| EPI_ISL_1017986, EPI_ISL_1017987, EPI_ISL_1017988                                                                                                                                                                                                                                                                                                                                                                                                                                                                                                                                                                                                                                                                                                                                                                                                                                                                                                                                                                                                                                                                                                                                                                                                                                                                                                                                                                                                                                                                                                                                                                                                                                                                                                                                                                                                                                                                                                                                                                                                                                                                                                                                                                                                                                                                                                                                                                                                                                                                                                                                                                                                                                                                                                                                                                                                                                                                                                                                                                                                                                                                                                                                                                                                                                                                                                                                                                                                                                                                                                                                                                                                                                                                                                                                                                                                                                                                                                                                                                                                                                                                                                                                                                                                                                                                                                                                                       | DOHMH Corona                    | New York City Public Health Laboratory                                                                                                     | Jade Wang, et al.                                                                                                                                                            |
| EPI_ISL_1017989, EPI_ISL_1017990                                                                                                                                                                                                                                                                                                                                                                                                                                                                                                                                                                                                                                                                                                                                                                                                                                                                                                                                                                                                                                                                                                                                                                                                                                                                                                                                                                                                                                                                                                                                                                                                                                                                                                                                                                                                                                                                                                                                                                                                                                                                                                                                                                                                                                                                                                                                                                                                                                                                                                                                                                                                                                                                                                                                                                                                                                                                                                                                                                                                                                                                                                                                                                                                                                                                                                                                                                                                                                                                                                                                                                                                                                                                                                                                                                                                                                                                                                                                                                                                                                                                                                                                                                                                                                                                                                                                                                        | Department of Homeless Services | New York City Public Health Laboratory                                                                                                     | Jade Wang, et al.                                                                                                                                                            |
| EPI_ISL_1017991                                                                                                                                                                                                                                                                                                                                                                                                                                                                                                                                                                                                                                                                                                                                                                                                                                                                                                                                                                                                                                                                                                                                                                                                                                                                                                                                                                                                                                                                                                                                                                                                                                                                                                                                                                                                                                                                                                                                                                                                                                                                                                                                                                                                                                                                                                                                                                                                                                                                                                                                                                                                                                                                                                                                                                                                                                                                                                                                                                                                                                                                                                                                                                                                                                                                                                                                                                                                                                                                                                                                                                                                                                                                                                                                                                                                                                                                                                                                                                                                                                                                                                                                                                                                                                                                                                                                                                                         | DOHMH PHL                       | New York City Public Health Laboratory                                                                                                     | Jade Wang, et al.                                                                                                                                                            |
| EPI_ISL_1017992, EPI_ISL_1017993, EPI_ISL_1017994                                                                                                                                                                                                                                                                                                                                                                                                                                                                                                                                                                                                                                                                                                                                                                                                                                                                                                                                                                                                                                                                                                                                                                                                                                                                                                                                                                                                                                                                                                                                                                                                                                                                                                                                                                                                                                                                                                                                                                                                                                                                                                                                                                                                                                                                                                                                                                                                                                                                                                                                                                                                                                                                                                                                                                                                                                                                                                                                                                                                                                                                                                                                                                                                                                                                                                                                                                                                                                                                                                                                                                                                                                                                                                                                                                                                                                                                                                                                                                                                                                                                                                                                                                                                                                                                                                                                                       | DOHMH Jamaica                   | New York City Public Health Laboratory                                                                                                     | Jade Wang, et al.                                                                                                                                                            |
| EPI_ISL_1017995, EPI_ISL_1017996, EPI_ISL_1017997, EPI_ISL_1017998, EPI_ISL_1017999                                                                                                                                                                                                                                                                                                                                                                                                                                                                                                                                                                                                                                                                                                                                                                                                                                                                                                                                                                                                                                                                                                                                                                                                                                                                                                                                                                                                                                                                                                                                                                                                                                                                                                                                                                                                                                                                                                                                                                                                                                                                                                                                                                                                                                                                                                                                                                                                                                                                                                                                                                                                                                                                                                                                                                                                                                                                                                                                                                                                                                                                                                                                                                                                                                                                                                                                                                                                                                                                                                                                                                                                                                                                                                                                                                                                                                                                                                                                                                                                                                                                                                                                                                                                                                                                                                                     | DOHMH Corona                    | New York City Public Health Laboratory                                                                                                     | Jade Wang, et al.                                                                                                                                                            |
| EPI_ISL_1018000                                                                                                                                                                                                                                                                                                                                                                                                                                                                                                                                                                                                                                                                                                                                                                                                                                                                                                                                                                                                                                                                                                                                                                                                                                                                                                                                                                                                                                                                                                                                                                                                                                                                                                                                                                                                                                                                                                                                                                                                                                                                                                                                                                                                                                                                                                                                                                                                                                                                                                                                                                                                                                                                                                                                                                                                                                                                                                                                                                                                                                                                                                                                                                                                                                                                                                                                                                                                                                                                                                                                                                                                                                                                                                                                                                                                                                                                                                                                                                                                                                                                                                                                                                                                                                                                                                                                                                                         | DOHMH Morrisania                | New York City Public Health Laboratory                                                                                                     | Jade Wang, et al.                                                                                                                                                            |
| EPI_ISL_1018001                                                                                                                                                                                                                                                                                                                                                                                                                                                                                                                                                                                                                                                                                                                                                                                                                                                                                                                                                                                                                                                                                                                                                                                                                                                                                                                                                                                                                                                                                                                                                                                                                                                                                                                                                                                                                                                                                                                                                                                                                                                                                                                                                                                                                                                                                                                                                                                                                                                                                                                                                                                                                                                                                                                                                                                                                                                                                                                                                                                                                                                                                                                                                                                                                                                                                                                                                                                                                                                                                                                                                                                                                                                                                                                                                                                                                                                                                                                                                                                                                                                                                                                                                                                                                                                                                                                                                                                         | DOHMH Central Harlem            | New York City Public Health Laboratory                                                                                                     | Jade Wang, et al.                                                                                                                                                            |
| EPI_ISL_1018002, EPI_ISL_1018003, EPI_ISL_1018004                                                                                                                                                                                                                                                                                                                                                                                                                                                                                                                                                                                                                                                                                                                                                                                                                                                                                                                                                                                                                                                                                                                                                                                                                                                                                                                                                                                                                                                                                                                                                                                                                                                                                                                                                                                                                                                                                                                                                                                                                                                                                                                                                                                                                                                                                                                                                                                                                                                                                                                                                                                                                                                                                                                                                                                                                                                                                                                                                                                                                                                                                                                                                                                                                                                                                                                                                                                                                                                                                                                                                                                                                                                                                                                                                                                                                                                                                                                                                                                                                                                                                                                                                                                                                                                                                                                                                       | DOHMH PHL                       | New York City Public Health Laboratory                                                                                                     | Jade Wang, et al.                                                                                                                                                            |
| EPI_ISL_1018005                                                                                                                                                                                                                                                                                                                                                                                                                                                                                                                                                                                                                                                                                                                                                                                                                                                                                                                                                                                                                                                                                                                                                                                                                                                                                                                                                                                                                                                                                                                                                                                                                                                                                                                                                                                                                                                                                                                                                                                                                                                                                                                                                                                                                                                                                                                                                                                                                                                                                                                                                                                                                                                                                                                                                                                                                                                                                                                                                                                                                                                                                                                                                                                                                                                                                                                                                                                                                                                                                                                                                                                                                                                                                                                                                                                                                                                                                                                                                                                                                                                                                                                                                                                                                                                                                                                                                                                         | DOHMH Corona                    | New York City Public Health Laboratory                                                                                                     | Jade Wang, et al.                                                                                                                                                            |
| EPI_ISL_1018006, EPI_ISL_1018007, EPI_ISL_1018008, EPI_ISL_1018009, EPI_ISL_1018010                                                                                                                                                                                                                                                                                                                                                                                                                                                                                                                                                                                                                                                                                                                                                                                                                                                                                                                                                                                                                                                                                                                                                                                                                                                                                                                                                                                                                                                                                                                                                                                                                                                                                                                                                                                                                                                                                                                                                                                                                                                                                                                                                                                                                                                                                                                                                                                                                                                                                                                                                                                                                                                                                                                                                                                                                                                                                                                                                                                                                                                                                                                                                                                                                                                                                                                                                                                                                                                                                                                                                                                                                                                                                                                                                                                                                                                                                                                                                                                                                                                                                                                                                                                                                                                                                                                     | DOHMH Morrisania                | New York City Public Health Laboratory                                                                                                     | Jade Wang, et al.                                                                                                                                                            |
| EPI_ISL_1018011                                                                                                                                                                                                                                                                                                                                                                                                                                                                                                                                                                                                                                                                                                                                                                                                                                                                                                                                                                                                                                                                                                                                                                                                                                                                                                                                                                                                                                                                                                                                                                                                                                                                                                                                                                                                                                                                                                                                                                                                                                                                                                                                                                                                                                                                                                                                                                                                                                                                                                                                                                                                                                                                                                                                                                                                                                                                                                                                                                                                                                                                                                                                                                                                                                                                                                                                                                                                                                                                                                                                                                                                                                                                                                                                                                                                                                                                                                                                                                                                                                                                                                                                                                                                                                                                                                                                                                                         | DOHMH Chelsea                   | New York City Public Health Laboratory                                                                                                     | Jade Wang, et al.                                                                                                                                                            |
| EPI_ISL_1018012, EPI_ISL_1018013, EPI_ISL_1018014, EPI_ISL_1018015, EPI_ISL_1018016, EPI_ISL_1018017, EPI_ISL_1018018, EPI_ISL_1018019, EPI_ISL_1018020                                                                                                                                                                                                                                                                                                                                                                                                                                                                                                                                                                                                                                                                                                                                                                                                                                                                                                                                                                                                                                                                                                                                                                                                                                                                                                                                                                                                                                                                                                                                                                                                                                                                                                                                                                                                                                                                                                                                                                                                                                                                                                                                                                                                                                                                                                                                                                                                                                                                                                                                                                                                                                                                                                                                                                                                                                                                                                                                                                                                                                                                                                                                                                                                                                                                                                                                                                                                                                                                                                                                                                                                                                                                                                                                                                                                                                                                                                                                                                                                                                                                                                                                                                                                                                                 | DOHMH Jamaica                   | New York City Public Health Laboratory                                                                                                     | Jade Wang, et al.                                                                                                                                                            |
| EPI_ISL_1018021                                                                                                                                                                                                                                                                                                                                                                                                                                                                                                                                                                                                                                                                                                                                                                                                                                                                                                                                                                                                                                                                                                                                                                                                                                                                                                                                                                                                                                                                                                                                                                                                                                                                                                                                                                                                                                                                                                                                                                                                                                                                                                                                                                                                                                                                                                                                                                                                                                                                                                                                                                                                                                                                                                                                                                                                                                                                                                                                                                                                                                                                                                                                                                                                                                                                                                                                                                                                                                                                                                                                                                                                                                                                                                                                                                                                                                                                                                                                                                                                                                                                                                                                                                                                                                                                                                                                                                                         | DOHMH Crown Heights             | New York City Public Health Laboratory                                                                                                     | Jade Wang, et al.                                                                                                                                                            |
| EPI_ISL_1018022, EPI_ISL_1018023                                                                                                                                                                                                                                                                                                                                                                                                                                                                                                                                                                                                                                                                                                                                                                                                                                                                                                                                                                                                                                                                                                                                                                                                                                                                                                                                                                                                                                                                                                                                                                                                                                                                                                                                                                                                                                                                                                                                                                                                                                                                                                                                                                                                                                                                                                                                                                                                                                                                                                                                                                                                                                                                                                                                                                                                                                                                                                                                                                                                                                                                                                                                                                                                                                                                                                                                                                                                                                                                                                                                                                                                                                                                                                                                                                                                                                                                                                                                                                                                                                                                                                                                                                                                                                                                                                                                                                        | DOHMH Jamaica                   | New York City Public Health Laboratory                                                                                                     | Jade Wang, et al.                                                                                                                                                            |
| EPI_ISL_1018024                                                                                                                                                                                                                                                                                                                                                                                                                                                                                                                                                                                                                                                                                                                                                                                                                                                                                                                                                                                                                                                                                                                                                                                                                                                                                                                                                                                                                                                                                                                                                                                                                                                                                                                                                                                                                                                                                                                                                                                                                                                                                                                                                                                                                                                                                                                                                                                                                                                                                                                                                                                                                                                                                                                                                                                                                                                                                                                                                                                                                                                                                                                                                                                                                                                                                                                                                                                                                                                                                                                                                                                                                                                                                                                                                                                                                                                                                                                                                                                                                                                                                                                                                                                                                                                                                                                                                                                         | DOHMH Crown Heights             | New York City Public Health Laboratory                                                                                                     | Jade Wang, et al.                                                                                                                                                            |
| EPI_ISL_1018025, EPI_ISL_1018026                                                                                                                                                                                                                                                                                                                                                                                                                                                                                                                                                                                                                                                                                                                                                                                                                                                                                                                                                                                                                                                                                                                                                                                                                                                                                                                                                                                                                                                                                                                                                                                                                                                                                                                                                                                                                                                                                                                                                                                                                                                                                                                                                                                                                                                                                                                                                                                                                                                                                                                                                                                                                                                                                                                                                                                                                                                                                                                                                                                                                                                                                                                                                                                                                                                                                                                                                                                                                                                                                                                                                                                                                                                                                                                                                                                                                                                                                                                                                                                                                                                                                                                                                                                                                                                                                                                                                                        | DOHMH Morrisania                | New York City Public Health Laboratory                                                                                                     | Jade Wang, et al.                                                                                                                                                            |
| EPI_ISL_1018027, EPI_ISL_1018028, EPI_ISL_1018029, EPI_ISL_1018030, EPI_ISL_1018031                                                                                                                                                                                                                                                                                                                                                                                                                                                                                                                                                                                                                                                                                                                                                                                                                                                                                                                                                                                                                                                                                                                                                                                                                                                                                                                                                                                                                                                                                                                                                                                                                                                                                                                                                                                                                                                                                                                                                                                                                                                                                                                                                                                                                                                                                                                                                                                                                                                                                                                                                                                                                                                                                                                                                                                                                                                                                                                                                                                                                                                                                                                                                                                                                                                                                                                                                                                                                                                                                                                                                                                                                                                                                                                                                                                                                                                                                                                                                                                                                                                                                                                                                                                                                                                                                                                     | DOHMH Corona                    | New York City Public Health Laboratory                                                                                                     | Jade Wang, et al.                                                                                                                                                            |
| EPI_ISL_1018032, EPI_ISL_1018033, EPI_ISL_1018034, EPI_ISL_1018035, EPI_ISL_1018036, EPI_ISL_1018037, EPI_ISL_1018038, EPI_ISL_1018039, EPI_ISL_1018040, EPI_ISL_1018041, EPI_ISL_1018042, EPI_ISL_1018043, EPI_ISL_1018044, EPI_ISL_1018045, EPI_ISL_1018046, EPI_ISL_1018047, EPI_ISL_1018048, EPI_ISL_1018049                                                                                                                                                                                                                                                                                                                                                                                                                                                                                                                                                                                                                                                                                                                                                                                                                                                                                                                                                                                                                                                                                                                                                                                                                                                                                                                                                                                                                                                                                                                                                                                                                                                                                                                                                                                                                                                                                                                                                                                                                                                                                                                                                                                                                                                                                                                                                                                                                                                                                                                                                                                                                                                                                                                                                                                                                                                                                                                                                                                                                                                                                                                                                                                                                                                                                                                                                                                                                                                                                                                                                                                                                                                                                                                                                                                                                                                                                                                                                                                                                                                                                        | see above                       | OCME Office Of Chief Medical Examiner<br>New York City Public Health Laboratory                                                            | Jade Wang, et al.                                                                                                                                                            |
| EPI_ISL_1020487, EPI_ISL_1020488, EPI_ISL_1020489, EPI_ISL_1020490, EPI_ISL_1020491, EPI_ISL_1020492, EPI_ISL_1020493, EPI_ISL_1020494, EPI_ISL_1020495, EPI_ISL_1020496, EPI_ISL_1020497, EPI_ISL_1020498, EPI_ISL_1020499, EPI_ISL_1020500, EPI_ISL_1020501, EPI_ISL_1020502, EPI_ISL_1020503, EPI_ISL_1020504, EPI_ISL_1020505, EPI_ISL_1020506, EPI_ISL_1020507, EPI_ISL_1020508, EPI_ISL_1020509, EPI_ISL_1020510, EPI_ISL_1020511, EPI_ISL_1020512, EPI_ISL_1020513, EPI_ISL_1020514, EPI_ISL_1020515, EPI_ISL_1020516, EPI_ISL_1020517, EPI_ISL_1020518, EPI_ISL_1020519, EPI_ISL_1020520, EPI_ISL_1020521, EPI_ISL_1020522, EPI_ISL_1020523, EPI_ISL_1020524, EPI_ISL_1020525, EPI_ISL_1020526, EPI_ISL_1020527, EPI_ISL_1020528, EPI_ISL_1020529, EPI_ISL_1020530, EPI_ISL_1020531, EPI_ISL_1020532, EPI_ISL_1020533, EPI_ISL_1020534, EPI_ISL_1020535, EPI_ISL_1020536, EPI_ISL_1020537, EPI_ISL_1020538, EPI_ISL_1020539, EPI_ISL_1020540, EPI_ISL_1020541, EPI_ISL_1020542, EPI_ISL_1020543, EPI_ISL_1020544, EPI_ISL_1020545, EPI_ISL_1020546, EPI_ISL_1020547, EPI_ISL_1020548, EPI_ISL_1020549, EPI_ISL_1020550                                                                                                                                                                                                                                                                                                                                                                                                                                                                                                                                                                                                                                                                                                                                                                                                                                                                                                                                                                                                                                                                                                                                                                                                                                                                                                                                                                                                                                                                                                                                                                                                                                                                                                                                                                                                                                                                                                                                                                                                                                                                                                                                                                                                                                                                                                                                                                                                                                                                                                                                                                                                                                                                                                                                                                                                                                                                                                                                                                                                                                                                                                                                                                                                                                                                          | see above                       | Columbia University Irving Medical Center<br>Wadsworth Center, New York State Department of Health                                         | Kristen St. George, Daryl M. Lamson, Alexis Russel, Matthew Shudt, Melissa A Leisner, Jonathan Pitnick, Navjot Singh, John Kelly, Erasmus Schneider, Erica Lasek-Nesselquist |
| EPI_ISL_1020593, EPI_ISL_1020774, EPI_ISL_1020778, EPI_ISL_1020810, EPI_ISL_1020839, EPI_ISL_1020872, EPI_ISL_1020911, EPI_ISL_1020934, EPI_ISL_1020989, EPI_ISL_1020994, EPI_ISL_1021030, EPI_ISL_1021033, EPI_ISL_1021041, EPI_ISL_1021054, EPI_ISL_1021057, EPI_ISL_1021066, EPI_ISL_1021081, EPI_ISL_1021094, EPI_ISL_1021098, EPI_ISL_1021121, EPI_ISL_1021123, EPI_ISL_1021125, EPI_ISL_1021128, EPI_ISL_1021135, EPI_ISL_1021136, EPI_ISL_1021168, EPI_ISL_1021181, EPI_ISL_1021210, EPI_ISL_1021229, EPI_ISL_1021257, EPI_ISL_1021265, EPI_ISL_1021359, EPI_ISL_1021360, EPI_ISL_1021361, EPI_ISL_1021368, EPI_ISL_1021383, EPI_ISL_1021384, EPI_ISL_1021394, EPI_ISL_1021413, EPI_ISL_1021428, EPI_ISL_1021437, EPI_ISL_1021501, EPI_ISL_1021507, EPI_ISL_1021508, EPI_ISL_1021540, EPI_ISL_1021542, EPI_ISL_1021561, EPI_ISL_1021562, EPI_ISL_1021592, EPI_ISL_1021630, EPI_ISL_1021655, EPI_ISL_1021669, EPI_ISL_1021722, EPI_ISL_1021735, EPI_ISL_1021736, EPI_ISL_1021750, EPI_ISL_1021751, EPI_ISL_1021761, EPI_ISL_1021803, EPI_ISL_1021819, EPI_ISL_1021824, EPI_ISL_1021832, EPI_ISL_1021857, EPI_ISL_1021865, EPI_ISL_1021868, EPI_ISL_1021928, EPI_ISL_1021963, EPI_ISL_1021969, EPI_ISL_1021970, EPI_ISL_1021981, EPI_ISL_1022042, EPI_ISL_1022048, EPI_ISL_1022085, EPI_ISL_1022107, EPI_ISL_1022108, EPI_ISL_1022130, EPI_ISL_1022131, EPI_ISL_1022132, EPI_ISL_1022167, EPI_ISL_1022205, EPI_ISL_1022209, EPI_ISL_1022214, EPI_ISL_1022227, EPI_ISL_1022261, EPI_ISL_1022269, EPI_ISL_1022288, EPI_ISL_1022311, EPI_ISL_1022325, EPI_ISL_1022336, EPI_ISL_1022371, EPI_ISL_1022372, EPI_ISL_1022373, EPI_ISL_1022374, EPI_ISL_1022395, EPI_ISL_1022396, EPI_ISL_1022600, EPI_ISL_1026006, EPI_ISL_1026023, EPI_ISL_1026103, EPI_ISL_1026107, EPI_ISL_1026212, EPI_ISL_1026215, EPI_ISL_1026241, EPI_ISL_1026300, EPI_ISL_1026306, EPI_ISL_1026346, EPI_ISL_1026443, EPI_ISL_1026456, EPI_ISL_1026490, EPI_ISL_1026532, EPI_ISL_1026540, EPI_ISL_1026613, EPI_ISL_1026630, EPI_ISL_1026672, EPI_ISL_1026695, EPI_ISL_1026726, EPI_ISL_1026732, EPI_ISL_1026854, EPI_ISL_1027684, EPI_ISL_1027727, EPI_ISL_1027736, EPI_ISL_1027771, EPI_ISL_1027772, EPI_ISL_1027774, EPI_ISL_1027777, EPI_ISL_1027779, EPI_ISL_1027812, EPI_ISL_1027837, EPI_ISL_1027866, EPI_ISL_1027919, EPI_ISL_1027979, EPI_ISL_1027990, EPI_ISL_1028017, EPI_ISL_1028026, EPI_ISL_1028037, EPI_ISL_1028113, EPI_ISL_1028119, EPI_ISL_1028181, EPI_ISL_1028310, EPI_ISL_1028315, EPI_ISL_1028330, EPI_ISL_1028384, EPI_ISL_1028401, EPI_ISL_1028439, EPI_ISL_1028460, EPI_ISL_1028469, EPI_ISL_1028524, EPI_ISL_1028539, EPI_ISL_1028544, EPI_ISL_1028547, EPI_ISL_1028558, EPI_ISL_1028572, EPI_ISL_1028615, EPI_ISL_1028632, EPI_ISL_1028640, EPI_ISL_1028645, EPI_ISL_1028656, EPI_ISL_1028687, EPI_ISL_1028690, EPI_ISL_1028716, EPI_ISL_1028743, EPI_ISL_1028773, EPI_ISL_1028812, EPI_ISL_1028847, EPI_ISL_1028870, EPI_ISL_1028936, EPI_ISL_1028951, EPI_ISL_1028954, EPI_ISL_1029021, EPI_ISL_1029031, EPI_ISL_1029056, EPI_ISL_1029070, EPI_ISL_1029074, EPI_ISL_1029084, EPI_ISL_1029086, EPI_ISL_1029087, EPI_ISL_1029088, EPI_ISL_1029244, EPI_ISL_1029245, EPI_ISL_1029248, EPI_ISL_1029249, EPI_ISL_1029287, EPI_ISL_1029288, EPI_ISL_1029289, EPI_ISL_1029328, EPI_ISL_1029401, EPI_ISL_1029411, EPI_ISL_1029440, EPI_ISL_1029441, EPI_ISL_1029442, EPI_ISL_1029485, EPI_ISL_1029486, EPI_ISL_1029487, EPI_ISL_1029501, EPI_ISL_1029502, EPI_ISL_1029917, EPI_ISL_1029939, EPI_ISL_1029941, EPI_ISL_1029943, EPI_ISL_1030530, EPI_ISL_1030622, EPI_ISL_1030672, EPI_ISL_1030682, EPI_ISL_1030748, EPI_ISL_1030785, EPI_ISL_1030833, EPI_ISL_1030880, EPI_ISL_1030908, EPI_ISL_1030946, EPI_ISL_1030998, EPI_ISL_1031026, EPI_ISL_1031031, EPI_ISL_1031049, EPI_ISL_1031122, EPI_ISL_1031224, EPI_ISL_1031247, EPI_ISL_1031251, EPI_ISL_1031276, EPI_ISL_1031295, EPI_ISL_1031374, EPI_ISL_1031503, EPI_ISL_1031511, EPI_ISL_1031544, EPI_ISL_1031563, EPI_ISL_1031660, EPI_ISL_1031678, EPI_ISL_1031687, EPI_ISL_1031765, EPI_ISL_1031766, EPI_ISL_1031797, EPI_ISL_1031873, EPI_ISL_1032050, EPI_ISL_1032060, EPI_ISL_1032067, EPI_ISL_1032163, EPI_ISL_1032196, EPI_ISL_1032197, EPI_ISL_1032201, EPI_ISL_1032205, EPI_ISL_1032344, EPI_ISL_1032393, EPI_ISL_1032394, EPI_ISL_1032395, EPI_ISL_1032399, EPI_ISL_1032401, EPI_ISL_1032405, EPI_ISL_1032567, EPI_ISL_1032580, EPI_ISL_1032581 | see above                       | Laboratory Corporation of America<br>Respiratory Viruses Branch, Division of Viral Diseases,<br>Centers for Disease Control and Prevention | Peter W. Cook, Dakota Howard, Dhvani Batra, Ben L. Rambo-Martin, Clinton R. Paden, Suxiang Tong, Duncan MacCannell                                                           |
| EPI_ISL_1034279                                                                                                                                                                                                                                                                                                                                                                                                                                                                                                                                                                                                                                                                                                                                                                                                                                                                                                                                                                                                                                                                                                                                                                                                                                                                                                                                                                                                                                                                                                                                                                                                                                                                                                                                                                                                                                                                                                                                                                                                                                                                                                                                                                                                                                                                                                                                                                                                                                                                                                                                                                                                                                                                                                                                                                                                                                                                                                                                                                                                                                                                                                                                                                                                                                                                                                                                                                                                                                                                                                                                                                                                                                                                                                                                                                                                                                                                                                                                                                                                                                                                                                                                                                                                                                                                                                                                                                                         | Northwest Pathology             | UW Virology Lab                                                                                                                            | Pavitra Roychoudhury, Lasata Shrestha, Shah A Mohamed Bakhsh, Michelle Lin, Hong Xie, Meei-Li Huang, Keith R Jerome, Alexander Greninger                                     |
| EPI_ISL_1036954, EPI_ISL_1037009, EPI_ISL_1037086, EPI_ISL_1037167, EPI_ISL_1037195, EPI_ISL_1037232, EPI_ISL_1037250, EPI_ISL_1037255, EPI_ISL_1037306, EPI_ISL_1037475, EPI_ISL_1037497, EPI_ISL_1037510, EPI_ISL_1037640, EPI_ISL_1037650, EPI_ISL_1037655, EPI_ISL_1037790, EPI_ISL_1037859, EPI_ISL_1037868, EPI_ISL_1037980, EPI_ISL_1037988, EPI_ISL_1038042, EPI_ISL_1038074, EPI_ISL_1038121, EPI_ISL_1038179, EPI_ISL_1038215, EPI_ISL_1038223, EPI_ISL_1038235, EPI_ISL_1038302, EPI_ISL_1038344, EPI_ISL_1038361, EPI_ISL_1038367, EPI_ISL_1038368, EPI_ISL_1038406, EPI_ISL_1038485, EPI_ISL_1038490, EPI_ISL_1038491, EPI_ISL_1038492, EPI_ISL_1038493, EPI_ISL_1038784, EPI_ISL_1038785                                                                                                                                                                                                                                                                                                                                                                                                                                                                                                                                                                                                                                                                                                                                                                                                                                                                                                                                                                                                                                                                                                                                                                                                                                                                                                                                                                                                                                                                                                                                                                                                                                                                                                                                                                                                                                                                                                                                                                                                                                                                                                                                                                                                                                                                                                                                                                                                                                                                                                                                                                                                                                                                                                                                                                                                                                                                                                                                                                                                                                                                                                                                                                                                                                                                                                                                                                                                                                                                                                                                                                                                                                                                                                  | see above                       | Laboratory Corporation of America<br>Respiratory Viruses Branch, Division of Viral Diseases,                                               | Peter W. Cook, Dakota Howard, Dhvani Batra, Ben L. Rambo-Martin, Clinton R. Paden, Suxiang Tong, Duncan MacCannell                                                           |



|                                                                                                                                                                                                                                                                                                                                                                                                                                                                                                                                                                                                                                                                                                                                |                                                       |                                                                        |                                                                                                                                                                                                                                                                                                                                                                                                                              |                                                                                                                                                                               |
|--------------------------------------------------------------------------------------------------------------------------------------------------------------------------------------------------------------------------------------------------------------------------------------------------------------------------------------------------------------------------------------------------------------------------------------------------------------------------------------------------------------------------------------------------------------------------------------------------------------------------------------------------------------------------------------------------------------------------------|-------------------------------------------------------|------------------------------------------------------------------------|------------------------------------------------------------------------------------------------------------------------------------------------------------------------------------------------------------------------------------------------------------------------------------------------------------------------------------------------------------------------------------------------------------------------------|-------------------------------------------------------------------------------------------------------------------------------------------------------------------------------|
|                                                                                                                                                                                                                                                                                                                                                                                                                                                                                                                                                                                                                                                                                                                                |                                                       | Division of Viral Diseases, Centers for Disease Control and Prevention | Sickler, Jingtao Liu, Eric Allen, Phil Febbo, Summer Galloway, Nicole L. Washington, Simon White, Geraint Levan, Kelly Schiabor Barrett, Elizabeth Cirulli, Alexandre Bolze, Ary Ascencio, Charlotte Rivera-Garcia, Ryan Cho, Jason Nguyen, Sherry Wang, Jimmy Ramirez, Tyler Cassens, Eren Sandoval, Magnus Isaksson, William Lee, David Becker, Marc Laurent, James Lu, Clinton R. Paden, Suixiang Tong, Duncan MacCannell |                                                                                                                                                                               |
| EPI_ISL_853648, EPI_ISL_853649                                                                                                                                                                                                                                                                                                                                                                                                                                                                                                                                                                                                                                                                                                 | THE MARY IMOGENE BASSETT HOSPITAL                     | Wadsworth Center, New York State Department of Health                  | Kirsten St. George, Daryl M. Lamson, Alexis Russel, Matthew Shudt, Melissa A Leisner, Jonathan Plitnick, Navjot Singh, John Kelly, Erasmus Schneider, Erica Lasek-Nesselquist                                                                                                                                                                                                                                                |                                                                                                                                                                               |
| EPI_ISL_853650, EPI_ISL_853651                                                                                                                                                                                                                                                                                                                                                                                                                                                                                                                                                                                                                                                                                                 | NORTHWELL HEALTH LABORATORIES                         | Wadsworth Center, New York State Department of Health                  | Kirsten St. George, Daryl M. Lamson, Alexis Russel, Matthew Shudt, Melissa A Leisner, Jonathan Plitnick, Navjot Singh, John Kelly, Erasmus Schneider, Erica Lasek-Nesselquist                                                                                                                                                                                                                                                |                                                                                                                                                                               |
| EPI_ISL_853652                                                                                                                                                                                                                                                                                                                                                                                                                                                                                                                                                                                                                                                                                                                 | THE MARY IMOGENE BASSETT HOSPITAL                     | Wadsworth Center, New York State Department of Health                  | Kirsten St. George, Daryl M. Lamson, Alexis Russel, Matthew Shudt, Melissa A Leisner, Jonathan Plitnick, Navjot Singh, John Kelly, Erasmus Schneider, Erica Lasek-Nesselquist                                                                                                                                                                                                                                                |                                                                                                                                                                               |
| EPI_ISL_853653, EPI_ISL_853654, EPI_ISL_853655, EPI_ISL_853656, EPI_ISL_853657, EPI_ISL_853658, EPI_ISL_853659, EPI_ISL_853660, EPI_ISL_853661, EPI_ISL_853662, EPI_ISL_853663, EPI_ISL_853664, EPI_ISL_853665, EPI_ISL_853666                                                                                                                                                                                                                                                                                                                                                                                                                                                                                                 | see above                                             | NORTHWELL HEALTH LABORATORIES                                          | Wadsworth Center, New York State Department of Health                                                                                                                                                                                                                                                                                                                                                                        | Kirsten St. George, Daryl M. Lamson, Alexis Russel, Matthew Shudt, Melissa A Leisner, Jonathan Plitnick, Navjot Singh, John Kelly, Erasmus Schneider, Erica Lasek-Nesselquist |
| EPI_ISL_853667, EPI_ISL_853668, EPI_ISL_853669                                                                                                                                                                                                                                                                                                                                                                                                                                                                                                                                                                                                                                                                                 | THE MARY IMOGENE BASSETT HOSPITAL                     | Wadsworth Center, New York State Department of Health                  | Kirsten St. George, Daryl M. Lamson, Alexis Russel, Matthew Shudt, Melissa A Leisner, Jonathan Plitnick, Navjot Singh, John Kelly, Erasmus Schneider, Erica Lasek-Nesselquist                                                                                                                                                                                                                                                |                                                                                                                                                                               |
| EPI_ISL_853670, EPI_ISL_853671, EPI_ISL_853672, EPI_ISL_853673, EPI_ISL_853674, EPI_ISL_853675                                                                                                                                                                                                                                                                                                                                                                                                                                                                                                                                                                                                                                 | NORTHWELL HEALTH LABORATORIES                         | Wadsworth Center, New York State Department of Health                  | Kirsten St. George, Daryl M. Lamson, Alexis Russel, Matthew Shudt, Melissa A Leisner, Jonathan Plitnick, Navjot Singh, John Kelly, Erasmus Schneider, Erica Lasek-Nesselquist                                                                                                                                                                                                                                                |                                                                                                                                                                               |
| EPI_ISL_853676, EPI_ISL_853677, EPI_ISL_853678, EPI_ISL_853679, EPI_ISL_853680, EPI_ISL_853681, EPI_ISL_853682                                                                                                                                                                                                                                                                                                                                                                                                                                                                                                                                                                                                                 | ACUTIS DIAGNOSTICS                                    | Wadsworth Center, New York State Department of Health                  | Kirsten St. George, Daryl M. Lamson, Alexis Russel, Matthew Shudt, Melissa A Leisner, Jonathan Plitnick, Navjot Singh, John Kelly, Erasmus Schneider, Erica Lasek-Nesselquist                                                                                                                                                                                                                                                |                                                                                                                                                                               |
| EPI_ISL_853683                                                                                                                                                                                                                                                                                                                                                                                                                                                                                                                                                                                                                                                                                                                 | NORTHWELL HEALTH LABORATORIES                         | Wadsworth Center, New York State Department of Health                  | Kirsten St. George, Daryl M. Lamson, Alexis Russel, Matthew Shudt, Melissa A Leisner, Jonathan Plitnick, Navjot Singh, John Kelly, Erasmus Schneider, Erica Lasek-Nesselquist                                                                                                                                                                                                                                                |                                                                                                                                                                               |
| EPI_ISL_853684, EPI_ISL_853685, EPI_ISL_853686, EPI_ISL_853687                                                                                                                                                                                                                                                                                                                                                                                                                                                                                                                                                                                                                                                                 | ALBANY MEDICAL CENTER HOSPITAL CLINICAL LABORATORIES  | Wadsworth Center, New York State Department of Health                  | Kirsten St. George, Daryl M. Lamson, Alexis Russel, Matthew Shudt, Melissa A Leisner, Jonathan Plitnick, Navjot Singh, John Kelly, Erasmus Schneider, Erica Lasek-Nesselquist                                                                                                                                                                                                                                                |                                                                                                                                                                               |
| EPI_ISL_853688                                                                                                                                                                                                                                                                                                                                                                                                                                                                                                                                                                                                                                                                                                                 | THE MARY IMOGENE BASSETT HOSPITAL                     | Wadsworth Center, New York State Department of Health                  | Kirsten St. George, Daryl M. Lamson, Alexis Russel, Matthew Shudt, Melissa A Leisner, Jonathan Plitnick, Navjot Singh, John Kelly, Erasmus Schneider, Erica Lasek-Nesselquist                                                                                                                                                                                                                                                |                                                                                                                                                                               |
| EPI_ISL_853689                                                                                                                                                                                                                                                                                                                                                                                                                                                                                                                                                                                                                                                                                                                 | SUNY UPSTATE MEDICAL UNIVERSITY                       | Wadsworth Center, New York State Department of Health                  | Kirsten St. George, Daryl M. Lamson, Alexis Russel, Matthew Shudt, Melissa A Leisner, Jonathan Plitnick, Navjot Singh, John Kelly, Erasmus Schneider, Erica Lasek-Nesselquist                                                                                                                                                                                                                                                |                                                                                                                                                                               |
| EPI_ISL_853690, EPI_ISL_853691, EPI_ISL_853692, EPI_ISL_853693, EPI_ISL_853694, EPI_ISL_853695, EPI_ISL_853696, EPI_ISL_853697, EPI_ISL_853698, EPI_ISL_853699, EPI_ISL_853700, EPI_ISL_853701, EPI_ISL_853702, EPI_ISL_853703, EPI_ISL_853704                                                                                                                                                                                                                                                                                                                                                                                                                                                                                 | see above                                             | ALBANY MEDICAL CENTER HOSPITAL CLINICAL LABORATORIES                   | Wadsworth Center, New York State Department of Health                                                                                                                                                                                                                                                                                                                                                                        | Kirsten St. George, Daryl M. Lamson, Alexis Russel, Matthew Shudt, Melissa A Leisner, Jonathan Plitnick, Navjot Singh, John Kelly, Erasmus Schneider, Erica Lasek-Nesselquist |
| EPI_ISL_853705                                                                                                                                                                                                                                                                                                                                                                                                                                                                                                                                                                                                                                                                                                                 | NORTHWELL HEALTH LABORATORIES                         | Wadsworth Center, New York State Department of Health                  | Kirsten St. George, Daryl M. Lamson, Alexis Russel, Matthew Shudt, Melissa A Leisner, Jonathan Plitnick, Navjot Singh, John Kelly, Erasmus Schneider, Erica Lasek-Nesselquist                                                                                                                                                                                                                                                |                                                                                                                                                                               |
| EPI_ISL_853706, EPI_ISL_853707, EPI_ISL_853708                                                                                                                                                                                                                                                                                                                                                                                                                                                                                                                                                                                                                                                                                 | SUNY UPSTATE MEDICAL UNIVERSITY                       | Wadsworth Center, New York State Department of Health                  | Kirsten St. George, Daryl M. Lamson, Alexis Russel, Matthew Shudt, Melissa A Leisner, Jonathan Plitnick, Navjot Singh, John Kelly, Erasmus Schneider, Erica Lasek-Nesselquist                                                                                                                                                                                                                                                |                                                                                                                                                                               |
| EPI_ISL_853709, EPI_ISL_853710, EPI_ISL_853711                                                                                                                                                                                                                                                                                                                                                                                                                                                                                                                                                                                                                                                                                 | ALBANY MEDICAL CENTER HOSPITAL CLINICAL LABORATORIES  | Wadsworth Center, New York State Department of Health                  | Kirsten St. George, Daryl M. Lamson, Alexis Russel, Matthew Shudt, Melissa A Leisner, Jonathan Plitnick, Navjot Singh, John Kelly, Erasmus Schneider, Erica Lasek-Nesselquist                                                                                                                                                                                                                                                |                                                                                                                                                                               |
| EPI_ISL_853712, EPI_ISL_853713, EPI_ISL_853714                                                                                                                                                                                                                                                                                                                                                                                                                                                                                                                                                                                                                                                                                 | NORTHWELL HEALTH LABORATORIES                         | Wadsworth Center, New York State Department of Health                  | Kirsten St. George, Daryl M. Lamson, Alexis Russel, Matthew Shudt, Melissa A Leisner, Jonathan Plitnick, Navjot Singh, John Kelly, Erasmus Schneider, Erica Lasek-Nesselquist                                                                                                                                                                                                                                                |                                                                                                                                                                               |
| EPI_ISL_853715                                                                                                                                                                                                                                                                                                                                                                                                                                                                                                                                                                                                                                                                                                                 | SUNY UPSTATE MEDICAL UNIVERSITY                       | Wadsworth Center, New York State Department of Health                  | Kirsten St. George, Daryl M. Lamson, Alexis Russel, Matthew Shudt, Melissa A Leisner, Jonathan Plitnick, Navjot Singh, John Kelly, Erasmus Schneider, Erica Lasek-Nesselquist                                                                                                                                                                                                                                                |                                                                                                                                                                               |
| EPI_ISL_853716, EPI_ISL_853717                                                                                                                                                                                                                                                                                                                                                                                                                                                                                                                                                                                                                                                                                                 | NORTHWELL HEALTH LABORATORIES                         | Wadsworth Center, New York State Department of Health                  | Kirsten St. George, Daryl M. Lamson, Alexis Russel, Matthew Shudt, Melissa A Leisner, Jonathan Plitnick, Navjot Singh, John Kelly, Erasmus Schneider, Erica Lasek-Nesselquist                                                                                                                                                                                                                                                |                                                                                                                                                                               |
| EPI_ISL_854305                                                                                                                                                                                                                                                                                                                                                                                                                                                                                                                                                                                                                                                                                                                 | ESOTERIX GENETIC LABORATORIES LLC                     | Wadsworth Center, New York State Department of Health                  | Kirsten St. George, Daryl M. Lamson, Alexis Russel, Matthew Shudt, Melissa A Leisner, Jonathan Plitnick, Navjot Singh, John Kelly, Erasmus Schneider, Erica Lasek-Nesselquist                                                                                                                                                                                                                                                |                                                                                                                                                                               |
| EPI_ISL_854306, EPI_ISL_854307, EPI_ISL_854308, EPI_ISL_854309, EPI_ISL_854310, EPI_ISL_854311, EPI_ISL_854312, EPI_ISL_854313, EPI_ISL_854314, EPI_ISL_854315, EPI_ISL_854316, EPI_ISL_854317, EPI_ISL_854318, EPI_ISL_854319, EPI_ISL_854320, EPI_ISL_854321, EPI_ISL_854322, EPI_ISL_854323, EPI_ISL_854324, EPI_ISL_854325, EPI_ISL_854326, EPI_ISL_854327, EPI_ISL_854328, EPI_ISL_854329, EPI_ISL_854330, EPI_ISL_854331, EPI_ISL_854332, EPI_ISL_854333, EPI_ISL_854334, EPI_ISL_854335, EPI_ISL_854336, EPI_ISL_854337, EPI_ISL_854338, EPI_ISL_854339, EPI_ISL_854340, EPI_ISL_854341, EPI_ISL_854342, EPI_ISL_854343, EPI_ISL_854344, EPI_ISL_854345, EPI_ISL_854346, EPI_ISL_854347, EPI_ISL_854348, EPI_ISL_854349 | see above                                             | URMC LABS                                                              | Wadsworth Center, New York State Department of Health                                                                                                                                                                                                                                                                                                                                                                        | Kirsten St. George, Daryl M. Lamson, Alexis Russel, Matthew Shudt, Melissa A Leisner, Jonathan Plitnick, Navjot Singh, John Kelly, Erasmus Schneider, Erica Lasek-Nesselquist |
| EPI_ISL_854350, EPI_ISL_854351, EPI_ISL_854352, EPI_ISL_854353, EPI_ISL_854354, EPI_ISL_854355, EPI_ISL_854356, EPI_ISL_854357, EPI_ISL_854358, EPI_ISL_854359, EPI_ISL_854360, EPI_ISL_854361, EPI_ISL_854362, EPI_ISL_854363, EPI_ISL_854364, EPI_ISL_854365, EPI_ISL_854366, EPI_ISL_854367                                                                                                                                                                                                                                                                                                                                                                                                                                 | see above                                             | BIO-REFERENCE LABORATORIES                                             | Wadsworth Center, New York State Department of Health                                                                                                                                                                                                                                                                                                                                                                        | Kirsten St. George, Daryl M. Lamson, Alexis Russel, Matthew Shudt, Melissa A Leisner, Jonathan Plitnick, Navjot Singh, John Kelly, Erasmus Schneider, Erica Lasek-Nesselquist |
| EPI_ISL_854368                                                                                                                                                                                                                                                                                                                                                                                                                                                                                                                                                                                                                                                                                                                 | Wadsworth Center, New York State Department of Health | Wadsworth Center, New York State Department of Health                  | Kirsten St. George, Daryl M. Lamson, Alexis Russel, Matthew Shudt, Melissa A Leisner, Jonathan Plitnick, Navjot Singh, John Kelly, Erasmus Schneider, Erica Lasek-Nesselquist                                                                                                                                                                                                                                                |                                                                                                                                                                               |
| EPI_ISL_854369                                                                                                                                                                                                                                                                                                                                                                                                                                                                                                                                                                                                                                                                                                                 | BIO-REFERENCE LABORATORIES                            | Wadsworth Center, New York State Department of Health                  | Kirsten St. George, Daryl M. Lamson, Alexis Russel, Matthew Shudt, Melissa A Leisner, Jonathan Plitnick, Navjot Singh, John Kelly, Erasmus Schneider, Erica Lasek-Nesselquist                                                                                                                                                                                                                                                |                                                                                                                                                                               |
| EPI_ISL_854370, EPI_ISL_854371                                                                                                                                                                                                                                                                                                                                                                                                                                                                                                                                                                                                                                                                                                 | URMC LABS                                             | Wadsworth Center, New York State Department of Health                  | Kirsten St. George, Daryl M. Lamson, Alexis Russel, Matthew Shudt, Melissa A Leisner, Jonathan Plitnick, Navjot Singh, John Kelly, Erasmus Schneider, Erica Lasek-Nesselquist                                                                                                                                                                                                                                                |                                                                                                                                                                               |
| EPI_ISL_854372                                                                                                                                                                                                                                                                                                                                                                                                                                                                                                                                                                                                                                                                                                                 | BIO-REFERENCE LABORATORIES                            | Wadsworth Center, New York State Department of Health                  | Kirsten St. George, Daryl M. Lamson, Alexis Russel, Matthew Shudt, Melissa A Leisner, Jonathan Plitnick, Navjot Singh, John Kelly, Erasmus Schneider, Erica Lasek-Nesselquist                                                                                                                                                                                                                                                |                                                                                                                                                                               |
| EPI_ISL_854373                                                                                                                                                                                                                                                                                                                                                                                                                                                                                                                                                                                                                                                                                                                 | MONTEFIORE MEDICAL CENTER LABORATORIES                | Wadsworth Center, New York State Department of Health                  | Kirsten St. George, Daryl M. Lamson, Alexis Russel, Matthew Shudt, Melissa A Leisner, Jonathan Plitnick, Navjot Singh, John Kelly, Erasmus Schneider, Erica Lasek-Nesselquist                                                                                                                                                                                                                                                |                                                                                                                                                                               |
| EPI_ISL_854374, EPI_ISL_854375, EPI_ISL_854376, EPI_ISL_854377, EPI_ISL_854378, EPI_ISL_854379, EPI_ISL_854380, EPI_ISL_854381, EPI_ISL_854382, EPI_ISL_854383, EPI_ISL_854384, EPI_ISL_854385, EPI_ISL_854386, EPI_ISL_854387, EPI_ISL_854388, EPI_ISL_854389, EPI_ISL_854390, EPI_ISL_854391, EPI_ISL_854392, EPI_ISL_854393, EPI_ISL_854394, EPI_ISL_854395, EPI_ISL_854396, EPI_ISL_854397, EPI_ISL_854398                                                                                                                                                                                                                                                                                                                 | see above                                             | WESTCHESTER MEDICAL CENTER                                             | Wadsworth Center, New York State Department of Health                                                                                                                                                                                                                                                                                                                                                                        | Kirsten St. George, Daryl M. Lamson, Alexis Russel, Matthew Shudt, Melissa A Leisner, Jonathan Plitnick, Navjot Singh, John Kelly, Erasmus Schneider, Erica Lasek-Nesselquist |
| EPI_ISL_854399                                                                                                                                                                                                                                                                                                                                                                                                                                                                                                                                                                                                                                                                                                                 | URMC LABS                                             | Wadsworth Center, New York State Department of Health                  | Kirsten St. George, Daryl M. Lamson, Alexis Russel, Matthew Shudt, Melissa A Leisner, Jonathan Plitnick, Navjot Singh, John Kelly, Erasmus Schneider, Erica Lasek-Nesselquist                                                                                                                                                                                                                                                |                                                                                                                                                                               |
| EPI_ISL_854400, EPI_ISL_854401,                                                                                                                                                                                                                                                                                                                                                                                                                                                                                                                                                                                                                                                                                                | WESTCHESTER MEDICAL CENTER                            | Wadsworth Center, New York State Department of Health                  | Kirsten St. George, Daryl M. Lamson, Alexis Russel, Matthew Shudt, Melissa A Leisner, Jonathan Plitnick, Navjot Singh, John Kelly, Erasmus Schneider,                                                                                                                                                                                                                                                                        |                                                                                                                                                                               |

|                                                                                                                                                                                                                                                                |                                        |                                                       |                                                                                                                                                                                                  |
|----------------------------------------------------------------------------------------------------------------------------------------------------------------------------------------------------------------------------------------------------------------|----------------------------------------|-------------------------------------------------------|--------------------------------------------------------------------------------------------------------------------------------------------------------------------------------------------------|
| EPI_ISL_854402, EPI_ISL_854403                                                                                                                                                                                                                                 |                                        |                                                       | Erica Lasek-Nesselquist                                                                                                                                                                          |
| EPI_ISL_854404                                                                                                                                                                                                                                                 | URMC LABS                              | Wadsworth Center, New York State Department of Health | Kirsten St. George, Daryl M. Lamson, Alexis Russel, Matthew Shudt, Melissa A Leisner, Jonathan Plitnick, Navjot Singh, John Kelly, Erasmus Schneider, Erica Lasek-Nesselquist                    |
| EPI_ISL_854405, EPI_ISL_854406, EPI_ISL_854407, EPI_ISL_854408, EPI_ISL_854409, EPI_ISL_854410, EPI_ISL_854411, EPI_ISL_854412, EPI_ISL_854413, EPI_ISL_854414, EPI_ISL_854415, EPI_ISL_854416, EPI_ISL_854417, EPI_ISL_854418, EPI_ISL_854419, EPI_ISL_854420 | see above                              | MONTEFIORE MEDICAL CENTER LABORATORIES                | Wadsworth Center, New York State Department of Health                                                                                                                                            |
| EPI_ISL_854421                                                                                                                                                                                                                                                 | SARATOGA HOSPITAL LABORATORY           | Wadsworth Center, New York State Department of Health | Kirsten St. George, Daryl M. Lamson, Alexis Russel, Matthew Shudt, Melissa A Leisner, Jonathan Plitnick, Navjot Singh, John Kelly, Erasmus Schneider, Erica Lasek-Nesselquist                    |
| EPI_ISL_854422, EPI_ISL_854423, EPI_ISL_854424, EPI_ISL_854425, EPI_ISL_854426, EPI_ISL_854427, EPI_ISL_854428, EPI_ISL_854429, EPI_ISL_854430, EPI_ISL_854431, EPI_ISL_854432, EPI_ISL_854433, EPI_ISL_854434, EPI_ISL_854435                                 | see above                              | MONTEFIORE MEDICAL CENTER LABORATORIES                | Wadsworth Center, New York State Department of Health                                                                                                                                            |
| EPI_ISL_854436, EPI_ISL_854437, EPI_ISL_854438, EPI_ISL_854439, EPI_ISL_854440, EPI_ISL_854441, EPI_ISL_854442, EPI_ISL_854443, EPI_ISL_854444, EPI_ISL_854445                                                                                                 |                                        | SARATOGA HOSPITAL LABORATORY                          | Wadsworth Center, New York State Department of Health                                                                                                                                            |
| EPI_ISL_854446                                                                                                                                                                                                                                                 | BOSTON HEART DIAGNOSTICS CORP          | Wadsworth Center, New York State Department of Health | Kirsten St. George, Daryl M. Lamson, Alexis Russel, Matthew Shudt, Melissa A Leisner, Jonathan Plitnick, Navjot Singh, John Kelly, Erasmus Schneider, Erica Lasek-Nesselquist                    |
| EPI_ISL_854447, EPI_ISL_854448                                                                                                                                                                                                                                 | TEMPUS LABS INC                        | Wadsworth Center, New York State Department of Health | Kirsten St. George, Daryl M. Lamson, Alexis Russel, Matthew Shudt, Melissa A Leisner, Jonathan Plitnick, Navjot Singh, John Kelly, Erasmus Schneider, Erica Lasek-Nesselquist                    |
| EPI_ISL_854449                                                                                                                                                                                                                                                 | WESTCHESTER MEDICAL CENTER             | Wadsworth Center, New York State Department of Health | Kirsten St. George, Daryl M. Lamson, Alexis Russel, Matthew Shudt, Melissa A Leisner, Jonathan Plitnick, Navjot Singh, John Kelly, Erasmus Schneider, Erica Lasek-Nesselquist                    |
| EPI_ISL_854450                                                                                                                                                                                                                                                 | MONTEFIORE MEDICAL CENTER LABORATORIES | Wadsworth Center, New York State Department of Health | Kirsten St. George, Daryl M. Lamson, Alexis Russel, Matthew Shudt, Melissa A Leisner, Jonathan Plitnick, Navjot Singh, John Kelly, Erasmus Schneider, Erica Lasek-Nesselquist                    |
| EPI_ISL_854451                                                                                                                                                                                                                                                 | WESTCHESTER MEDICAL CENTER             | Wadsworth Center, New York State Department of Health | Kirsten St. George, Daryl M. Lamson, Alexis Russel, Matthew Shudt, Melissa A Leisner, Jonathan Plitnick, Navjot Singh, John Kelly, Erasmus Schneider, Erica Lasek-Nesselquist                    |
| EPI_ISL_854452, EPI_ISL_854453, EPI_ISL_854454, EPI_ISL_854455, EPI_ISL_854456, EPI_ISL_854457, EPI_ISL_854458, EPI_ISL_854459                                                                                                                                 |                                        | MONTEFIORE MEDICAL CENTER LABORATORIES                | Wadsworth Center, New York State Department of Health                                                                                                                                            |
| EPI_ISL_855165                                                                                                                                                                                                                                                 | Quest Diagnostics                      | Quest Diagnostics                                     | Rosenthal,S.H., Gerasimova,A., Kagan,R.M., Anderson, B., Hua, M., Liu Y., Bernstein, L.E., Livingston, K.E., Perez, A., Shalhout, D.F., Shlyakhter, I.A., Owen, R., Tanpaiboon, P., Lacbawan, F. |
| EPI_ISL_857056, EPI_ISL_857057, EPI_ISL_857058, EPI_ISL_857059, EPI_ISL_857060, EPI_ISL_857061, EPI_ISL_857062                                                                                                                                                 | OCME Office Of Chief Medical Examiner  | New York City Public Health Laboratory                | Jade Wang, et al.                                                                                                                                                                                |
| EPI_ISL_857063, EPI_ISL_857064, EPI_ISL_857065                                                                                                                                                                                                                 | DOHMH PHL                              | New York City Public Health Laboratory                | Jade Wang, et al.                                                                                                                                                                                |
| EPI_ISL_857066                                                                                                                                                                                                                                                 | OCME Office Of Chief Medical Examiner  | New York City Public Health Laboratory                | Jade Wang, et al.                                                                                                                                                                                |
| EPI_ISL_857067                                                                                                                                                                                                                                                 | DOHMH Corona                           | New York City Public Health Laboratory                | Jade Wang, et al.                                                                                                                                                                                |
| EPI_ISL_857068                                                                                                                                                                                                                                                 | DOHMH PHL                              | New York City Public Health Laboratory                | Jade Wang, et al.                                                                                                                                                                                |
| EPI_ISL_857069                                                                                                                                                                                                                                                 | DOHMH Jamaica                          | New York City Public Health Laboratory                | Jade Wang, et al.                                                                                                                                                                                |
| EPI_ISL_857070                                                                                                                                                                                                                                                 | DOHMH PHL                              | New York City Public Health Laboratory                | Jade Wang, et al.                                                                                                                                                                                |
| EPI_ISL_857071                                                                                                                                                                                                                                                 | DOHMH Morrisania                       | New York City Public Health Laboratory                | Jade Wang, et al.                                                                                                                                                                                |
| EPI_ISL_857072                                                                                                                                                                                                                                                 | DOHMH PHL                              | New York City Public Health Laboratory                | Jade Wang, et al.                                                                                                                                                                                |
| EPI_ISL_857073                                                                                                                                                                                                                                                 | DOHMH Corona                           | New York City Public Health Laboratory                | Jade Wang, et al.                                                                                                                                                                                |
| EPI_ISL_857074                                                                                                                                                                                                                                                 | DOHMH Morrisania                       | New York City Public Health Laboratory                | Jade Wang, et al.                                                                                                                                                                                |
| EPI_ISL_857075                                                                                                                                                                                                                                                 | DOHMH Jamaica                          | New York City Public Health Laboratory                | Jade Wang, et al.                                                                                                                                                                                |
| EPI_ISL_857076                                                                                                                                                                                                                                                 | DOHMH Chelsea                          | New York City Public Health Laboratory                | Jade Wang, et al.                                                                                                                                                                                |
| EPI_ISL_857077, EPI_ISL_857078, EPI_ISL_857079, EPI_ISL_857080                                                                                                                                                                                                 | DOHMH Central Harlem                   | New York City Public Health Laboratory                | Jade Wang, et al.                                                                                                                                                                                |
| EPI_ISL_857081                                                                                                                                                                                                                                                 | DOHMH Morrisania                       | New York City Public Health Laboratory                | Jade Wang, et al.                                                                                                                                                                                |
| EPI_ISL_857082, EPI_ISL_857083, EPI_ISL_857084                                                                                                                                                                                                                 | DOHMH Corona                           | New York City Public Health Laboratory                | Jade Wang, et al.                                                                                                                                                                                |
| EPI_ISL_857085, EPI_ISL_857086                                                                                                                                                                                                                                 | DOHMH Central Harlem                   | New York City Public Health Laboratory                | Jade Wang, et al.                                                                                                                                                                                |
| EPI_ISL_857087, EPI_ISL_857088                                                                                                                                                                                                                                 | DOHMH PHL                              | New York City Public Health Laboratory                | Jade Wang, et al.                                                                                                                                                                                |
| EPI_ISL_857089                                                                                                                                                                                                                                                 | DOHMH Crown Heights                    | New York City Public Health Laboratory                | Jade Wang, et al.                                                                                                                                                                                |
| EPI_ISL_857090                                                                                                                                                                                                                                                 | DOHMH Riverside                        | New York City Public Health Laboratory                | Jade Wang, et al.                                                                                                                                                                                |
| EPI_ISL_857091                                                                                                                                                                                                                                                 | DOHMH Jamaica                          | New York City Public Health Laboratory                | Jade Wang, et al.                                                                                                                                                                                |
| EPI_ISL_857092                                                                                                                                                                                                                                                 | DOHMH Riverside                        | New York City Public Health Laboratory                | Jade Wang, et al.                                                                                                                                                                                |
| EPI_ISL_857093                                                                                                                                                                                                                                                 | DOHMH Morrisania                       | New York City Public Health Laboratory                | Jade Wang, et al.                                                                                                                                                                                |
| EPI_ISL_857094                                                                                                                                                                                                                                                 | DOHMH Central Harlem                   | New York City Public Health Laboratory                | Jade Wang, et al.                                                                                                                                                                                |
| EPI_ISL_857095                                                                                                                                                                                                                                                 | DOHMH Fort Greene                      | New York City Public Health Laboratory                | Jade Wang, et al.                                                                                                                                                                                |
| EPI_ISL_857096                                                                                                                                                                                                                                                 | DOHMH Jamaica                          | New York City Public Health Laboratory                | Jade Wang, et al.                                                                                                                                                                                |
| EPI_ISL_857097                                                                                                                                                                                                                                                 | DOHMH Crown Heights                    | New York City Public Health Laboratory                | Jade Wang, et al.                                                                                                                                                                                |
| EPI_ISL_857098, EPI_ISL_857099                                                                                                                                                                                                                                 | DOHMH Morrisania                       | New York City Public Health Laboratory                | Jade Wang, et al.                                                                                                                                                                                |

|                                                                                      |                                       |                                        |                   |
|--------------------------------------------------------------------------------------|---------------------------------------|----------------------------------------|-------------------|
| EPI_ISL_857100                                                                       | DOHMH Central Harlem                  | New York City Public Health Laboratory | Jade Wang, et al. |
| EPI_ISL_857101, EPI_ISL_857102,<br>EPI_ISL_857103, EPI_ISL_857104,<br>EPI_ISL_857105 | DOHMH Corona                          | New York City Public Health Laboratory | Jade Wang, et al. |
| EPI_ISL_857106, EPI_ISL_857107,<br>EPI_ISL_857108, EPI_ISL_857109,<br>EPI_ISL_857110 | DOHMH Chelsea                         | New York City Public Health Laboratory | Jade Wang, et al. |
| EPI_ISL_857111                                                                       | DOHMH Riverside                       | New York City Public Health Laboratory | Jade Wang, et al. |
| EPI_ISL_857112, EPI_ISL_857113,<br>EPI_ISL_857114, EPI_ISL_857115                    | DOHMH Fort Greene                     | New York City Public Health Laboratory | Jade Wang, et al. |
| EPI_ISL_857116                                                                       | DOHMH Central Harlem                  | New York City Public Health Laboratory | Jade Wang, et al. |
| EPI_ISL_857117                                                                       | DOHMH Chelsea                         | New York City Public Health Laboratory | Jade Wang, et al. |
| EPI_ISL_857118                                                                       | DOHMH Central Harlem                  | New York City Public Health Laboratory | Jade Wang, et al. |
| EPI_ISL_857119                                                                       | DOHMH Morrisania                      | New York City Public Health Laboratory | Jade Wang, et al. |
| EPI_ISL_857120                                                                       | DOHMH Central Harlem                  | New York City Public Health Laboratory | Jade Wang, et al. |
| EPI_ISL_857121                                                                       | DOHMH PHL                             | New York City Public Health Laboratory | Jade Wang, et al. |
| EPI_ISL_857122, EPI_ISL_857123,<br>EPI_ISL_857124, EPI_ISL_857125                    | DOHMH Morrisania                      | New York City Public Health Laboratory | Jade Wang, et al. |
| EPI_ISL_857126                                                                       | DOHMH Central Harlem                  | New York City Public Health Laboratory | Jade Wang, et al. |
| EPI_ISL_857127, EPI_ISL_857128,<br>EPI_ISL_857129                                    | DOHMH PHL                             | New York City Public Health Laboratory | Jade Wang, et al. |
| EPI_ISL_857130, EPI_ISL_857131                                                       | DOHMH Chelsea                         | New York City Public Health Laboratory | Jade Wang, et al. |
| EPI_ISL_857132, EPI_ISL_857133                                                       | DOHMH Central Harlem                  | New York City Public Health Laboratory | Jade Wang, et al. |
| EPI_ISL_857134                                                                       | DOHMH PHL                             | New York City Public Health Laboratory | Jade Wang, et al. |
| EPI_ISL_857135                                                                       | DOHMH Corona                          | New York City Public Health Laboratory | Jade Wang, et al. |
| EPI_ISL_857136, EPI_ISL_857137,<br>EPI_ISL_857138, EPI_ISL_857139                    | DOHMH Chelsea                         | New York City Public Health Laboratory | Jade Wang, et al. |
| EPI_ISL_857140, EPI_ISL_857141                                                       | DOHMH Morrisania                      | New York City Public Health Laboratory | Jade Wang, et al. |
| EPI_ISL_857142                                                                       | DOHMH Central Harlem                  | New York City Public Health Laboratory | Jade Wang, et al. |
| EPI_ISL_857143, EPI_ISL_857144                                                       | DOHMH Riverside                       | New York City Public Health Laboratory | Jade Wang, et al. |
| EPI_ISL_857145, EPI_ISL_857146,<br>EPI_ISL_857147                                    | DOHMH Corona                          | New York City Public Health Laboratory | Jade Wang, et al. |
| EPI_ISL_857148                                                                       | DOHMH Fort Greene                     | New York City Public Health Laboratory | Jade Wang, et al. |
| EPI_ISL_857149, EPI_ISL_857150,<br>EPI_ISL_857151, EPI_ISL_857152                    | DOHMH Jamaica                         | New York City Public Health Laboratory | Jade Wang, et al. |
| EPI_ISL_857153                                                                       | DOHMH Corona                          | New York City Public Health Laboratory | Jade Wang, et al. |
| EPI_ISL_857154, EPI_ISL_857155                                                       | DOHMH Jamaica                         | New York City Public Health Laboratory | Jade Wang, et al. |
| EPI_ISL_857156                                                                       | DOHMH Corona                          | New York City Public Health Laboratory | Jade Wang, et al. |
| EPI_ISL_857157                                                                       | DOHMH PHL                             | New York City Public Health Laboratory | Jade Wang, et al. |
| EPI_ISL_857158                                                                       | DOHMH Corona                          | New York City Public Health Laboratory | Jade Wang, et al. |
| EPI_ISL_857159, EPI_ISL_857160                                                       | DOHMH Morrisania                      | New York City Public Health Laboratory | Jade Wang, et al. |
| EPI_ISL_857161, EPI_ISL_857162                                                       | DOHMH PHL                             | New York City Public Health Laboratory | Jade Wang, et al. |
| EPI_ISL_857163                                                                       | DOHMH Central Harlem                  | New York City Public Health Laboratory | Jade Wang, et al. |
| EPI_ISL_857164                                                                       | DOHMH Morrisania                      | New York City Public Health Laboratory | Jade Wang, et al. |
| EPI_ISL_857165                                                                       | DOHMH Corona                          | New York City Public Health Laboratory | Jade Wang, et al. |
| EPI_ISL_857166, EPI_ISL_857167                                                       | DOHMH Fort Greene                     | New York City Public Health Laboratory | Jade Wang, et al. |
| EPI_ISL_857168                                                                       | DOHMH Corona                          | New York City Public Health Laboratory | Jade Wang, et al. |
| EPI_ISL_857169, EPI_ISL_857170,<br>EPI_ISL_857171                                    | DOHMH Morrisania                      | New York City Public Health Laboratory | Jade Wang, et al. |
| EPI_ISL_857172, EPI_ISL_857173                                                       | DOHMH Crown Heights                   | New York City Public Health Laboratory | Jade Wang, et al. |
| EPI_ISL_857174, EPI_ISL_857175,<br>EPI_ISL_857176, EPI_ISL_857177                    | DOHMH Jamaica                         | New York City Public Health Laboratory | Jade Wang, et al. |
| EPI_ISL_857178                                                                       | DOHMH Riverside                       | New York City Public Health Laboratory | Jade Wang, et al. |
| EPI_ISL_857179                                                                       | DOHMH Jamaica                         | New York City Public Health Laboratory | Jade Wang, et al. |
| EPI_ISL_857180, EPI_ISL_857181,<br>EPI_ISL_857182, EPI_ISL_857183                    | DOHMH Central Harlem                  | New York City Public Health Laboratory | Jade Wang, et al. |
| EPI_ISL_857184                                                                       | DOHMH Riverside                       | New York City Public Health Laboratory | Jade Wang, et al. |
| EPI_ISL_857185                                                                       | DOHMH PHL                             | New York City Public Health Laboratory | Jade Wang, et al. |
| EPI_ISL_857186                                                                       | OCME Office Of Chief Medical Examiner | New York City Public Health Laboratory | Jade Wang, et al. |
| EPI_ISL_857187                                                                       | DOHMH PHL                             | New York City Public Health Laboratory | Jade Wang, et al. |
| EPI_ISL_857188                                                                       | Department of Homeless Services       | New York City Public Health Laboratory | Jade Wang, et al. |
| EPI_ISL_857189                                                                       | DOHMH Corona                          | New York City Public Health Laboratory | Jade Wang, et al. |
| EPI_ISL_857190                                                                       | DOHMH PHL                             | New York City Public Health Laboratory | Jade Wang, et al. |



|                                                                                                                                                                            |                                       |                                        |                   |
|----------------------------------------------------------------------------------------------------------------------------------------------------------------------------|---------------------------------------|----------------------------------------|-------------------|
| EPI_ISL_857191                                                                                                                                                             | DOHMH Morrisania                      | New York City Public Health Laboratory | Jade Wang, et al. |
| EPI_ISL_857192                                                                                                                                                             | DOHMH PHL                             | New York City Public Health Laboratory | Jade Wang, et al. |
| EPI_ISL_857193                                                                                                                                                             | OCME Office Of Chief Medical Examiner | New York City Public Health Laboratory | Jade Wang, et al. |
| EPI_ISL_857194                                                                                                                                                             | DOHMH Central Harlem                  | New York City Public Health Laboratory | Jade Wang, et al. |
| EPI_ISL_857195                                                                                                                                                             | DOHMH Riverside                       | New York City Public Health Laboratory | Jade Wang, et al. |
| EPI_ISL_857196                                                                                                                                                             | DOHMH Crown Heights                   | New York City Public Health Laboratory | Jade Wang, et al. |
| EPI_ISL_857197                                                                                                                                                             | DOHMH Jamaica                         | New York City Public Health Laboratory | Jade Wang, et al. |
| EPI_ISL_857198                                                                                                                                                             | Department of Homeless Services       | New York City Public Health Laboratory | Jade Wang, et al. |
| EPI_ISL_857199                                                                                                                                                             | OCME Office Of Chief Medical Examiner | New York City Public Health Laboratory | Jade Wang, et al. |
| EPI_ISL_857200                                                                                                                                                             | DOHMH Central Harlem                  | New York City Public Health Laboratory | Jade Wang, et al. |
| EPI_ISL_857201                                                                                                                                                             | DOHMH Jamaica                         | New York City Public Health Laboratory | Jade Wang, et al. |
| EPI_ISL_857202                                                                                                                                                             | DOHMH PHL                             | New York City Public Health Laboratory | Jade Wang, et al. |
| EPI_ISL_857203                                                                                                                                                             | DOHMH Riverside                       | New York City Public Health Laboratory | Jade Wang, et al. |
| EPI_ISL_857204, EPI_ISL_857205                                                                                                                                             | DOHMH Central Harlem                  | New York City Public Health Laboratory | Jade Wang, et al. |
| EPI_ISL_857206                                                                                                                                                             | DOHMH PHL                             | New York City Public Health Laboratory | Jade Wang, et al. |
| EPI_ISL_857207, EPI_ISL_857208                                                                                                                                             | DOHMH Morrisania                      | New York City Public Health Laboratory | Jade Wang, et al. |
| EPI_ISL_857209                                                                                                                                                             | DOHMH Central Harlem                  | New York City Public Health Laboratory | Jade Wang, et al. |
| EPI_ISL_857210, EPI_ISL_857211,<br>EPI_ISL_857212, EPI_ISL_857213,<br>EPI_ISL_857214, EPI_ISL_857215,<br>EPI_ISL_857216, EPI_ISL_857217                                    | DOHMH Jamaica                         | New York City Public Health Laboratory | Jade Wang, et al. |
| EPI_ISL_857218, EPI_ISL_857219,<br>EPI_ISL_857220                                                                                                                          | DOHMH Corona                          | New York City Public Health Laboratory | Jade Wang, et al. |
| EPI_ISL_857221                                                                                                                                                             | DOHMH Fort Greene                     | New York City Public Health Laboratory | Jade Wang, et al. |
| EPI_ISL_857222, EPI_ISL_857223,<br>EPI_ISL_857224                                                                                                                          | DOHMH Jamaica                         | New York City Public Health Laboratory | Jade Wang, et al. |
| EPI_ISL_857225                                                                                                                                                             | DOHMH Corona                          | New York City Public Health Laboratory | Jade Wang, et al. |
| EPI_ISL_857226                                                                                                                                                             | DOHMH Jamaica                         | New York City Public Health Laboratory | Jade Wang, et al. |
| EPI_ISL_857227, EPI_ISL_857228                                                                                                                                             | DOHMH Riverside                       | New York City Public Health Laboratory | Jade Wang, et al. |
| EPI_ISL_857229                                                                                                                                                             | DOHMH Morrisania                      | New York City Public Health Laboratory | Jade Wang, et al. |
| EPI_ISL_857230                                                                                                                                                             | DOHMH Chelsea                         | New York City Public Health Laboratory | Jade Wang, et al. |
| EPI_ISL_857231, EPI_ISL_857232,<br>EPI_ISL_857233                                                                                                                          | DOHMH Central Harlem                  | New York City Public Health Laboratory | Jade Wang, et al. |
| EPI_ISL_857234, EPI_ISL_857235,<br>EPI_ISL_857236, EPI_ISL_857237                                                                                                          | DOHMH Jamaica                         | New York City Public Health Laboratory | Jade Wang, et al. |
| EPI_ISL_857238, EPI_ISL_857239,<br>EPI_ISL_857240                                                                                                                          | DOHMH Corona                          | New York City Public Health Laboratory | Jade Wang, et al. |
| EPI_ISL_857241, EPI_ISL_857242,<br>EPI_ISL_857243, EPI_ISL_857244,<br>EPI_ISL_857245, EPI_ISL_857246,<br>EPI_ISL_857247, EPI_ISL_857248,<br>EPI_ISL_857249, EPI_ISL_857250 | DOHMH Jamaica                         | New York City Public Health Laboratory | Jade Wang, et al. |
| EPI_ISL_857251, EPI_ISL_857252                                                                                                                                             | DOHMH Morrisania                      | New York City Public Health Laboratory | Jade Wang, et al. |
| EPI_ISL_857253, EPI_ISL_857254                                                                                                                                             | DOHMH Chelsea                         | New York City Public Health Laboratory | Jade Wang, et al. |
| EPI_ISL_857255                                                                                                                                                             | DOHMH Central Harlem                  | New York City Public Health Laboratory | Jade Wang, et al. |
| EPI_ISL_857256                                                                                                                                                             | DOHMH Fort Greene                     | New York City Public Health Laboratory | Jade Wang, et al. |
| EPI_ISL_857257                                                                                                                                                             | DOHMH PHL                             | New York City Public Health Laboratory | Jade Wang, et al. |
| EPI_ISL_857258, EPI_ISL_857259                                                                                                                                             | DOHMH Central Harlem                  | New York City Public Health Laboratory | Jade Wang, et al. |
| EPI_ISL_857260, EPI_ISL_857261,<br>EPI_ISL_857262                                                                                                                          | DOHMH Chelsea                         | New York City Public Health Laboratory | Jade Wang, et al. |
| EPI_ISL_857263, EPI_ISL_857264                                                                                                                                             | DOHMH Corona                          | New York City Public Health Laboratory | Jade Wang, et al. |
| EPI_ISL_857265                                                                                                                                                             | DOHMH Fort Greene                     | New York City Public Health Laboratory | Jade Wang, et al. |
| EPI_ISL_857266                                                                                                                                                             | DOHMH PHL                             | New York City Public Health Laboratory | Jade Wang, et al. |
| EPI_ISL_857267, EPI_ISL_857268,<br>EPI_ISL_857269, EPI_ISL_857270                                                                                                          | DOHMH Jamaica                         | New York City Public Health Laboratory | Jade Wang, et al. |
| EPI_ISL_857271, EPI_ISL_857272,<br>EPI_ISL_857273                                                                                                                          | DOHMH Morrisania                      | New York City Public Health Laboratory | Jade Wang, et al. |
| EPI_ISL_857274, EPI_ISL_857275,<br>EPI_ISL_857276                                                                                                                          | DOHMH Jamaica                         | New York City Public Health Laboratory | Jade Wang, et al. |
| EPI_ISL_857277                                                                                                                                                             | DOHMH Corona                          | New York City Public Health Laboratory | Jade Wang, et al. |
| EPI_ISL_857278                                                                                                                                                             | DOHMH PHL                             | New York City Public Health Laboratory | Jade Wang, et al. |
| EPI_ISL_857279, EPI_ISL_857280                                                                                                                                             | DOHMH Fort Greene                     | New York City Public Health Laboratory | Jade Wang, et al. |
| EPI_ISL_857281                                                                                                                                                             | DOHMH Riverside                       | New York City Public Health Laboratory | Jade Wang, et al. |
| EPI_ISL_857282, EPI_ISL_857283                                                                                                                                             | DOHMH Morrisania                      | New York City Public Health Laboratory | Jade Wang, et al. |



|                                                                                                                                                                                                                                                                                                                                                                                                                                                                                                                                                                                                                                                                                                                                |           |                                       |                                                                                                                            |                                                                                                                                                                                                                                                                                                                                                                                                                                                                                                                                                                                                                                                                                                                                                                                        |
|--------------------------------------------------------------------------------------------------------------------------------------------------------------------------------------------------------------------------------------------------------------------------------------------------------------------------------------------------------------------------------------------------------------------------------------------------------------------------------------------------------------------------------------------------------------------------------------------------------------------------------------------------------------------------------------------------------------------------------|-----------|---------------------------------------|----------------------------------------------------------------------------------------------------------------------------|----------------------------------------------------------------------------------------------------------------------------------------------------------------------------------------------------------------------------------------------------------------------------------------------------------------------------------------------------------------------------------------------------------------------------------------------------------------------------------------------------------------------------------------------------------------------------------------------------------------------------------------------------------------------------------------------------------------------------------------------------------------------------------------|
| EPI_ISL_861369, EPI_ISL_861370, EPI_ISL_861371, EPI_ISL_861372, EPI_ISL_861373, EPI_ISL_861374, EPI_ISL_861375, EPI_ISL_861376, EPI_ISL_861377, EPI_ISL_861378, EPI_ISL_861379, EPI_ISL_861380, EPI_ISL_861381, EPI_ISL_861382, EPI_ISL_861383, EPI_ISL_861384, EPI_ISL_861385, EPI_ISL_861386, EPI_ISL_861387, EPI_ISL_861388, EPI_ISL_861389, EPI_ISL_861390, EPI_ISL_861391, EPI_ISL_861392, EPI_ISL_861393, EPI_ISL_861394, EPI_ISL_861395, EPI_ISL_861396, EPI_ISL_861397, EPI_ISL_861398, EPI_ISL_861399, EPI_ISL_861400, EPI_ISL_861401, EPI_ISL_861402, EPI_ISL_861403, EPI_ISL_861404, EPI_ISL_861405, EPI_ISL_861406, EPI_ISL_861407, EPI_ISL_861408, EPI_ISL_861409, EPI_ISL_861410, EPI_ISL_861411, EPI_ISL_861412 | see above | WESTCHESTER MEDICAL CENTER            | Wadsworth Center, New York State Department of Health                                                                      | Kirsten St. George, Daryl M. Lamson, Alexis Russel, Matthew Shudt, Melissa A Leisner, Jonathan Plitnick, Navjot Singh, John Kelly, Erasmus Schneider, Erica Lasek-Nesselquist                                                                                                                                                                                                                                                                                                                                                                                                                                                                                                                                                                                                          |
| EPI_ISL_861413, EPI_ISL_861414, EPI_ISL_861415, EPI_ISL_861416, EPI_ISL_861417, EPI_ISL_861418                                                                                                                                                                                                                                                                                                                                                                                                                                                                                                                                                                                                                                 |           | NORTH SHORE UNIVERSITY HOSPITAL       | Wadsworth Center, New York State Department of Health                                                                      | Kirsten St. George, Daryl M. Lamson, Alexis Russel, Matthew Shudt, Melissa A Leisner, Jonathan Plitnick, Navjot Singh, John Kelly, Erasmus Schneider, Erica Lasek-Nesselquist                                                                                                                                                                                                                                                                                                                                                                                                                                                                                                                                                                                                          |
| EPI_ISL_861758                                                                                                                                                                                                                                                                                                                                                                                                                                                                                                                                                                                                                                                                                                                 |           | Murphy Medical Associates             | Grubaugh Lab - Yale School of Public Health                                                                                | Tara Alpert, Joseph Fauver, Anderson Brito, Mallery Breban, Anne Wylie, Chantal Vogels, Mary Petrone, Annie Watkins, Chaney Kalinich, Isabel Ott, Nathan Grubaugh                                                                                                                                                                                                                                                                                                                                                                                                                                                                                                                                                                                                                      |
| EPI_ISL_876032, EPI_ISL_876033, EPI_ISL_876034, EPI_ISL_876035, EPI_ISL_876036, EPI_ISL_876037, EPI_ISL_876038, EPI_ISL_876039, EPI_ISL_876040, EPI_ISL_876041                                                                                                                                                                                                                                                                                                                                                                                                                                                                                                                                                                 |           | Montefiore Medical Center             | Albert Einstein College of Medicine, Dept. of Microbiology & Immunology, Chandran lab                                      | J. Maximilian Fels, Saad Khan, Ryan Forster, Karin A. Skalina, Surksha Sirichand, Amy S. Fox, Aviv Bergman, William B. Mitchell, Lucia R. Wolgast, Wendy Szymczak, Robert H. Bortz III, M. Eugenia Dieterle, Catalina Florez, Denise Haslwanter, Rohit K. Jangra, Ethan Laudermilch, Ariel S. Wirchanski, Jason Barnhill, David L. Goldman, Hnin Khine, D. Yitzchak Goldstein, Johanna P. Daily, Kartik Chandran, Libusha Kelly                                                                                                                                                                                                                                                                                                                                                        |
| EPI_ISL_876519                                                                                                                                                                                                                                                                                                                                                                                                                                                                                                                                                                                                                                                                                                                 |           | DOHMH Jamaica                         | New York City Public Health Laboratory                                                                                     | Jade Wang, et al.                                                                                                                                                                                                                                                                                                                                                                                                                                                                                                                                                                                                                                                                                                                                                                      |
| EPI_ISL_876711, EPI_ISL_876712                                                                                                                                                                                                                                                                                                                                                                                                                                                                                                                                                                                                                                                                                                 |           | Helix/Illumina                        | Genomics and Discovery, Respiratory Viruses Branch, Division of Viral Diseases, Centers for Disease Control and Prevention | Peter W. Cook, Dhvani Batra, Ben L. Rambo-Martin, Eileen de Feo, Jan Antico, Christine Tran, Matthew Tolentino, Shannon Wickline, Kim Gietzen, Brad Sickler, Jingtao Liu, Eric Allen, Phil Febbo, Summer Galloway, Nicole L. Washington, Simon White, Geraint Levan, Kelly Schiabor Barrett, Elizabeth Cirulli, Alexandre Bolze, Ary Ascencio, Charlotte Rivera-Garcia, Ryan Cho, Jason Nguyen, Sherry Wang, Jimmy Ramirez, Tyler Cassens, Efrén Sandoval, Magnus Isaksson, William Lee, David Becker, Marc Laurent, James Lu, Clinton R. Paden, Suxiang Tong, Duncan MacCannell, Rosenthal, S.H., Gerasimova, A., Kagan, R.M., Anderson, B., Hua, M., Liu, Y., Bernstein, L.E., Livingston, K.E., Perez, A., Shalhout, D.F., Shlyakhter, I.A., Owen, R., Tanpaiboon, P., Lacbawan, F. |
| EPI_ISL_876925, EPI_ISL_876951, EPI_ISL_877121                                                                                                                                                                                                                                                                                                                                                                                                                                                                                                                                                                                                                                                                                 |           | Quest Diagnostics                     | Quest Diagnostics                                                                                                          | Rosenthal, S.H., Gerasimova, A., Kagan, R.M., Anderson, B., Hua, M., Liu, Y., Bernstein, L.E., Livingston, K.E., Perez, A., Shalhout, D.F., Shlyakhter, I.A., Owen, R., Tanpaiboon, P., Lacbawan, F.                                                                                                                                                                                                                                                                                                                                                                                                                                                                                                                                                                                   |
| EPI_ISL_883307, EPI_ISL_883308                                                                                                                                                                                                                                                                                                                                                                                                                                                                                                                                                                                                                                                                                                 |           | Pandemic Response Laboratory          | New York City Public Health Laboratory                                                                                     | Jade Wang, et al.                                                                                                                                                                                                                                                                                                                                                                                                                                                                                                                                                                                                                                                                                                                                                                      |
| EPI_ISL_883309                                                                                                                                                                                                                                                                                                                                                                                                                                                                                                                                                                                                                                                                                                                 |           | DOHMH Central Harlem                  | New York City Public Health Laboratory                                                                                     | Jade Wang, et al.                                                                                                                                                                                                                                                                                                                                                                                                                                                                                                                                                                                                                                                                                                                                                                      |
| EPI_ISL_883310                                                                                                                                                                                                                                                                                                                                                                                                                                                                                                                                                                                                                                                                                                                 |           | DOHMH Jamaica                         | New York City Public Health Laboratory                                                                                     | Jade Wang, et al.                                                                                                                                                                                                                                                                                                                                                                                                                                                                                                                                                                                                                                                                                                                                                                      |
| EPI_ISL_883311                                                                                                                                                                                                                                                                                                                                                                                                                                                                                                                                                                                                                                                                                                                 |           | Pandemic Response Laboratory          | New York City Public Health Laboratory                                                                                     | Jade Wang, et al.                                                                                                                                                                                                                                                                                                                                                                                                                                                                                                                                                                                                                                                                                                                                                                      |
| EPI_ISL_883312, EPI_ISL_883313                                                                                                                                                                                                                                                                                                                                                                                                                                                                                                                                                                                                                                                                                                 |           | DOHMH Corona                          | New York City Public Health Laboratory                                                                                     | Jade Wang, et al.                                                                                                                                                                                                                                                                                                                                                                                                                                                                                                                                                                                                                                                                                                                                                                      |
| EPI_ISL_883314                                                                                                                                                                                                                                                                                                                                                                                                                                                                                                                                                                                                                                                                                                                 |           | DOHMH Jamaica                         | New York City Public Health Laboratory                                                                                     | Jade Wang, et al.                                                                                                                                                                                                                                                                                                                                                                                                                                                                                                                                                                                                                                                                                                                                                                      |
| EPI_ISL_883315, EPI_ISL_883316                                                                                                                                                                                                                                                                                                                                                                                                                                                                                                                                                                                                                                                                                                 |           | OCME Office Of Chief Medical Examiner | New York City Public Health Laboratory                                                                                     | Jade Wang, et al.                                                                                                                                                                                                                                                                                                                                                                                                                                                                                                                                                                                                                                                                                                                                                                      |
| EPI_ISL_883317                                                                                                                                                                                                                                                                                                                                                                                                                                                                                                                                                                                                                                                                                                                 |           | Pandemic Response Laboratory          | New York City Public Health Laboratory                                                                                     | Jade Wang, et al.                                                                                                                                                                                                                                                                                                                                                                                                                                                                                                                                                                                                                                                                                                                                                                      |
| EPI_ISL_883318, EPI_ISL_883319, EPI_ISL_883320, EPI_ISL_883321, EPI_ISL_883322, EPI_ISL_883323                                                                                                                                                                                                                                                                                                                                                                                                                                                                                                                                                                                                                                 |           | DOHMH Jamaica                         | New York City Public Health Laboratory                                                                                     | Jade Wang, et al.                                                                                                                                                                                                                                                                                                                                                                                                                                                                                                                                                                                                                                                                                                                                                                      |
| EPI_ISL_883324                                                                                                                                                                                                                                                                                                                                                                                                                                                                                                                                                                                                                                                                                                                 |           | DOHMH Central Harlem                  | New York City Public Health Laboratory                                                                                     | Jade Wang, et al.                                                                                                                                                                                                                                                                                                                                                                                                                                                                                                                                                                                                                                                                                                                                                                      |
| EPI_ISL_883325                                                                                                                                                                                                                                                                                                                                                                                                                                                                                                                                                                                                                                                                                                                 |           | OCME Office Of Chief Medical Examiner | New York City Public Health Laboratory                                                                                     | Jade Wang, et al.                                                                                                                                                                                                                                                                                                                                                                                                                                                                                                                                                                                                                                                                                                                                                                      |
| EPI_ISL_883326                                                                                                                                                                                                                                                                                                                                                                                                                                                                                                                                                                                                                                                                                                                 |           | Department of Homeless Services       | New York City Public Health Laboratory                                                                                     | Jade Wang, et al.                                                                                                                                                                                                                                                                                                                                                                                                                                                                                                                                                                                                                                                                                                                                                                      |
| EPI_ISL_883327                                                                                                                                                                                                                                                                                                                                                                                                                                                                                                                                                                                                                                                                                                                 |           | DOHMH Central Harlem                  | New York City Public Health Laboratory                                                                                     | Jade Wang, et al.                                                                                                                                                                                                                                                                                                                                                                                                                                                                                                                                                                                                                                                                                                                                                                      |
| EPI_ISL_883328                                                                                                                                                                                                                                                                                                                                                                                                                                                                                                                                                                                                                                                                                                                 |           | OCME Office Of Chief Medical Examiner | New York City Public Health Laboratory                                                                                     | Jade Wang, et al.                                                                                                                                                                                                                                                                                                                                                                                                                                                                                                                                                                                                                                                                                                                                                                      |
| EPI_ISL_883329                                                                                                                                                                                                                                                                                                                                                                                                                                                                                                                                                                                                                                                                                                                 |           | DOHMH Central Harlem                  | New York City Public Health Laboratory                                                                                     | Jade Wang, et al.                                                                                                                                                                                                                                                                                                                                                                                                                                                                                                                                                                                                                                                                                                                                                                      |
| EPI_ISL_883330                                                                                                                                                                                                                                                                                                                                                                                                                                                                                                                                                                                                                                                                                                                 |           | OCME Office Of Chief Medical Examiner | New York City Public Health Laboratory                                                                                     | Jade Wang, et al.                                                                                                                                                                                                                                                                                                                                                                                                                                                                                                                                                                                                                                                                                                                                                                      |
| EPI_ISL_883331                                                                                                                                                                                                                                                                                                                                                                                                                                                                                                                                                                                                                                                                                                                 |           | DOHMH Morrisania                      | New York City Public Health Laboratory                                                                                     | Jade Wang, et al.                                                                                                                                                                                                                                                                                                                                                                                                                                                                                                                                                                                                                                                                                                                                                                      |
| EPI_ISL_883332                                                                                                                                                                                                                                                                                                                                                                                                                                                                                                                                                                                                                                                                                                                 |           | Department of Homeless Services       | New York City Public Health Laboratory                                                                                     | Jade Wang, et al.                                                                                                                                                                                                                                                                                                                                                                                                                                                                                                                                                                                                                                                                                                                                                                      |
| EPI_ISL_883333, EPI_ISL_883334                                                                                                                                                                                                                                                                                                                                                                                                                                                                                                                                                                                                                                                                                                 |           | DOHMH Riverside                       | New York City Public Health Laboratory                                                                                     | Jade Wang, et al.                                                                                                                                                                                                                                                                                                                                                                                                                                                                                                                                                                                                                                                                                                                                                                      |
| EPI_ISL_883335                                                                                                                                                                                                                                                                                                                                                                                                                                                                                                                                                                                                                                                                                                                 |           | DOHMH Chelsea                         | New York City Public Health Laboratory                                                                                     | Jade Wang, et al.                                                                                                                                                                                                                                                                                                                                                                                                                                                                                                                                                                                                                                                                                                                                                                      |
| EPI_ISL_883336                                                                                                                                                                                                                                                                                                                                                                                                                                                                                                                                                                                                                                                                                                                 |           | OCME Office Of Chief Medical Examiner | New York City Public Health Laboratory                                                                                     | Jade Wang, et al.                                                                                                                                                                                                                                                                                                                                                                                                                                                                                                                                                                                                                                                                                                                                                                      |
| EPI_ISL_883337                                                                                                                                                                                                                                                                                                                                                                                                                                                                                                                                                                                                                                                                                                                 |           | DOHMH Crown Heights                   | New York City Public Health Laboratory                                                                                     | Jade Wang, et al.                                                                                                                                                                                                                                                                                                                                                                                                                                                                                                                                                                                                                                                                                                                                                                      |
| EPI_ISL_883338                                                                                                                                                                                                                                                                                                                                                                                                                                                                                                                                                                                                                                                                                                                 |           | DOHMH Morrisania                      | New York City Public Health Laboratory                                                                                     | Jade Wang, et al.                                                                                                                                                                                                                                                                                                                                                                                                                                                                                                                                                                                                                                                                                                                                                                      |
| EPI_ISL_883339                                                                                                                                                                                                                                                                                                                                                                                                                                                                                                                                                                                                                                                                                                                 |           | DOHMH Chelsea                         | New York City Public Health Laboratory                                                                                     | Jade Wang, et al.                                                                                                                                                                                                                                                                                                                                                                                                                                                                                                                                                                                                                                                                                                                                                                      |
| EPI_ISL_883340, EPI_ISL_883341, EPI_ISL_883342, EPI_ISL_883343                                                                                                                                                                                                                                                                                                                                                                                                                                                                                                                                                                                                                                                                 |           | DOHMH PHL                             | New York City Public Health Laboratory                                                                                     | Jade Wang, et al.                                                                                                                                                                                                                                                                                                                                                                                                                                                                                                                                                                                                                                                                                                                                                                      |
| EPI_ISL_883344, EPI_ISL_883345                                                                                                                                                                                                                                                                                                                                                                                                                                                                                                                                                                                                                                                                                                 |           | OCME Office Of Chief Medical Examiner | New York City Public Health Laboratory                                                                                     | Jade Wang, et al.                                                                                                                                                                                                                                                                                                                                                                                                                                                                                                                                                                                                                                                                                                                                                                      |
| EPI_ISL_883346                                                                                                                                                                                                                                                                                                                                                                                                                                                                                                                                                                                                                                                                                                                 |           | DOHMH PHL                             | New York City Public Health Laboratory                                                                                     | Jade Wang, et al.                                                                                                                                                                                                                                                                                                                                                                                                                                                                                                                                                                                                                                                                                                                                                                      |
| EPI_ISL_883347                                                                                                                                                                                                                                                                                                                                                                                                                                                                                                                                                                                                                                                                                                                 |           | DOHMH Morrisania                      | New York City Public Health Laboratory                                                                                     | Jade Wang, et al.                                                                                                                                                                                                                                                                                                                                                                                                                                                                                                                                                                                                                                                                                                                                                                      |
| EPI_ISL_883348                                                                                                                                                                                                                                                                                                                                                                                                                                                                                                                                                                                                                                                                                                                 |           | DOHMH Corona                          | New York City Public Health Laboratory                                                                                     | Jade Wang, et al.                                                                                                                                                                                                                                                                                                                                                                                                                                                                                                                                                                                                                                                                                                                                                                      |
| EPI_ISL_883349                                                                                                                                                                                                                                                                                                                                                                                                                                                                                                                                                                                                                                                                                                                 |           | DOHMH Jamaica                         | New York City Public Health Laboratory                                                                                     | Jade Wang, et al.                                                                                                                                                                                                                                                                                                                                                                                                                                                                                                                                                                                                                                                                                                                                                                      |
| EPI_ISL_883350, EPI_ISL_883351, EPI_ISL_883352, EPI_ISL_883353                                                                                                                                                                                                                                                                                                                                                                                                                                                                                                                                                                                                                                                                 |           | OCME Office Of Chief Medical Examiner | New York City Public Health Laboratory                                                                                     | Jade Wang, et al.                                                                                                                                                                                                                                                                                                                                                                                                                                                                                                                                                                                                                                                                                                                                                                      |
| EPI_ISL_883354, EPI_ISL_883355, EPI_ISL_883356                                                                                                                                                                                                                                                                                                                                                                                                                                                                                                                                                                                                                                                                                 |           | DOHMH Corona                          | New York City Public Health Laboratory                                                                                     | Jade Wang, et al.                                                                                                                                                                                                                                                                                                                                                                                                                                                                                                                                                                                                                                                                                                                                                                      |
| EPI_ISL_883357, EPI_ISL_883358, EPI_ISL_883359, EPI_ISL_883360                                                                                                                                                                                                                                                                                                                                                                                                                                                                                                                                                                                                                                                                 |           | DOHMH Crown Heights                   | New York City Public Health Laboratory                                                                                     | Jade Wang, et al.                                                                                                                                                                                                                                                                                                                                                                                                                                                                                                                                                                                                                                                                                                                                                                      |
| EPI_ISL_883361, EPI_ISL_883362, EPI_ISL_883363                                                                                                                                                                                                                                                                                                                                                                                                                                                                                                                                                                                                                                                                                 |           | DOHMH PHL                             | New York City Public Health Laboratory                                                                                     | Jade Wang, et al.                                                                                                                                                                                                                                                                                                                                                                                                                                                                                                                                                                                                                                                                                                                                                                      |
| EPI_ISL_883364                                                                                                                                                                                                                                                                                                                                                                                                                                                                                                                                                                                                                                                                                                                 |           | DOHMH Crown Heights                   | New York City Public Health Laboratory                                                                                     | Jade Wang, et al.                                                                                                                                                                                                                                                                                                                                                                                                                                                                                                                                                                                                                                                                                                                                                                      |
| EPI_ISL_883365, EPI_ISL_883366, EPI_ISL_883367                                                                                                                                                                                                                                                                                                                                                                                                                                                                                                                                                                                                                                                                                 |           | DOHMH Morrisania                      | New York City Public Health Laboratory                                                                                     | Jade Wang, et al.                                                                                                                                                                                                                                                                                                                                                                                                                                                                                                                                                                                                                                                                                                                                                                      |

|                                                                                                                                                                                                                                                                                                                                                                                                                                                                |                                                       |                                                       |                                                                                                                                                                               |
|----------------------------------------------------------------------------------------------------------------------------------------------------------------------------------------------------------------------------------------------------------------------------------------------------------------------------------------------------------------------------------------------------------------------------------------------------------------|-------------------------------------------------------|-------------------------------------------------------|-------------------------------------------------------------------------------------------------------------------------------------------------------------------------------|
| EPI_ISL_883368, EPI_ISL_883369                                                                                                                                                                                                                                                                                                                                                                                                                                 | DOHMH Chelsea                                         | New York City Public Health Laboratory                | Jade Wang, et al.                                                                                                                                                             |
| EPI_ISL_883370                                                                                                                                                                                                                                                                                                                                                                                                                                                 | DOHMH Crown Heights                                   | New York City Public Health Laboratory                | Jade Wang, et al.                                                                                                                                                             |
| EPI_ISL_883371, EPI_ISL_883372                                                                                                                                                                                                                                                                                                                                                                                                                                 | DOHMH Central Harlem                                  | New York City Public Health Laboratory                | Jade Wang, et al.                                                                                                                                                             |
| EPI_ISL_883373, EPI_ISL_883374, EPI_ISL_883375                                                                                                                                                                                                                                                                                                                                                                                                                 | DOHMH Jamaica                                         | New York City Public Health Laboratory                | Jade Wang, et al.                                                                                                                                                             |
| EPI_ISL_883376, EPI_ISL_883377, EPI_ISL_883378, EPI_ISL_883379                                                                                                                                                                                                                                                                                                                                                                                                 | DOHMH Central Harlem                                  | New York City Public Health Laboratory                | Jade Wang, et al.                                                                                                                                                             |
| EPI_ISL_883380, EPI_ISL_883381, EPI_ISL_883382                                                                                                                                                                                                                                                                                                                                                                                                                 | DOHMH PHL                                             | New York City Public Health Laboratory                | Jade Wang, et al.                                                                                                                                                             |
| EPI_ISL_883383, EPI_ISL_883384, EPI_ISL_883385, EPI_ISL_883386, EPI_ISL_883387, EPI_ISL_883388, EPI_ISL_883389                                                                                                                                                                                                                                                                                                                                                 | Pandemic Response Laboratory                          | New York City Public Health Laboratory                | Jade Wang, et al.                                                                                                                                                             |
| EPI_ISL_883390, EPI_ISL_883391, EPI_ISL_883392, EPI_ISL_883393, EPI_ISL_883394                                                                                                                                                                                                                                                                                                                                                                                 | OCME Office Of Chief Medical Examiner                 | New York City Public Health Laboratory                | Jade Wang, et al.                                                                                                                                                             |
| EPI_ISL_883395, EPI_ISL_883396                                                                                                                                                                                                                                                                                                                                                                                                                                 | Department of Homeless Services                       | New York City Public Health Laboratory                | Jade Wang, et al.                                                                                                                                                             |
| EPI_ISL_883397, EPI_ISL_883398, EPI_ISL_883399, EPI_ISL_883400, EPI_ISL_883401, EPI_ISL_883402                                                                                                                                                                                                                                                                                                                                                                 | OCME Office Of Chief Medical Examiner                 | New York City Public Health Laboratory                | Jade Wang, et al.                                                                                                                                                             |
| EPI_ISL_883403                                                                                                                                                                                                                                                                                                                                                                                                                                                 | Department of Homeless Services                       | New York City Public Health Laboratory                | Jade Wang, et al.                                                                                                                                                             |
| EPI_ISL_883404, EPI_ISL_883405, EPI_ISL_883406, EPI_ISL_883407, EPI_ISL_883408                                                                                                                                                                                                                                                                                                                                                                                 | OCME Office Of Chief Medical Examiner                 | New York City Public Health Laboratory                | Jade Wang, et al.                                                                                                                                                             |
| EPI_ISL_883409                                                                                                                                                                                                                                                                                                                                                                                                                                                 | DOHMH Central Harlem                                  | New York City Public Health Laboratory                | Jade Wang, et al.                                                                                                                                                             |
| EPI_ISL_883410, EPI_ISL_883411                                                                                                                                                                                                                                                                                                                                                                                                                                 | DOHMH Corona                                          | New York City Public Health Laboratory                | Jade Wang, et al.                                                                                                                                                             |
| EPI_ISL_883412                                                                                                                                                                                                                                                                                                                                                                                                                                                 | DOHMH Crown Heights                                   | New York City Public Health Laboratory                | Jade Wang, et al.                                                                                                                                                             |
| EPI_ISL_883413, EPI_ISL_883414, EPI_ISL_883415                                                                                                                                                                                                                                                                                                                                                                                                                 | DOHMH Central Harlem                                  | New York City Public Health Laboratory                | Jade Wang, et al.                                                                                                                                                             |
| EPI_ISL_883416, EPI_ISL_883417                                                                                                                                                                                                                                                                                                                                                                                                                                 | DOHMH Fort Greene                                     | New York City Public Health Laboratory                | Jade Wang, et al.                                                                                                                                                             |
| EPI_ISL_883418, EPI_ISL_883419, EPI_ISL_883420, EPI_ISL_883421, EPI_ISL_883422, EPI_ISL_883423                                                                                                                                                                                                                                                                                                                                                                 | DOHMH Jamaica                                         | New York City Public Health Laboratory                | Jade Wang, et al.                                                                                                                                                             |
| EPI_ISL_883424                                                                                                                                                                                                                                                                                                                                                                                                                                                 | DOHMH PHL                                             | New York City Public Health Laboratory                | Jade Wang, et al.                                                                                                                                                             |
| EPI_ISL_883425                                                                                                                                                                                                                                                                                                                                                                                                                                                 | BOSTON HEART DIAGNOSTICS CORP                         | Wadsworth Center, New York State Department of Health | Kirsten St. George, Daryl M. Lamson, Alexis Russel, Matthew Shudt, Melissa A Leisner, Jonathan Plitnick, Navjot Singh, John Kelly, Erasmus Schneider, Erica Lasek-Nesselquist |
| EPI_ISL_883426, EPI_ISL_883427, EPI_ISL_883428                                                                                                                                                                                                                                                                                                                                                                                                                 | NORTHWELL HEALTH LABORATORIES                         | Wadsworth Center, New York State Department of Health | Kirsten St. George, Daryl M. Lamson, Alexis Russel, Matthew Shudt, Melissa A Leisner, Jonathan Plitnick, Navjot Singh, John Kelly, Erasmus Schneider, Erica Lasek-Nesselquist |
| EPI_ISL_883429, EPI_ISL_883430                                                                                                                                                                                                                                                                                                                                                                                                                                 | BOSTON HEART DIAGNOSTICS CORP                         | Wadsworth Center, New York State Department of Health | Kirsten St. George, Daryl M. Lamson, Alexis Russel, Matthew Shudt, Melissa A Leisner, Jonathan Plitnick, Navjot Singh, John Kelly, Erasmus Schneider, Erica Lasek-Nesselquist |
| EPI_ISL_883431, EPI_ISL_883432, EPI_ISL_883433, EPI_ISL_883434, EPI_ISL_883435                                                                                                                                                                                                                                                                                                                                                                                 | NORTHWELL HEALTH LABORATORIES                         | Wadsworth Center, New York State Department of Health | Kirsten St. George, Daryl M. Lamson, Alexis Russel, Matthew Shudt, Melissa A Leisner, Jonathan Plitnick, Navjot Singh, John Kelly, Erasmus Schneider, Erica Lasek-Nesselquist |
| EPI_ISL_883436, EPI_ISL_883437, EPI_ISL_883438, EPI_ISL_883439, EPI_ISL_883440, EPI_ISL_883441, EPI_ISL_883442, EPI_ISL_883443, EPI_ISL_883444                                                                                                                                                                                                                                                                                                                 | ADIRONDACK MEDICAL CENTER                             | Wadsworth Center, New York State Department of Health | Kirsten St. George, Daryl M. Lamson, Alexis Russel, Matthew Shudt, Melissa A Leisner, Jonathan Plitnick, Navjot Singh, John Kelly, Erasmus Schneider, Erica Lasek-Nesselquist |
| EPI_ISL_883445, EPI_ISL_883446, EPI_ISL_883447, EPI_ISL_883448, EPI_ISL_883449, EPI_ISL_883450, EPI_ISL_883451, EPI_ISL_883452, EPI_ISL_883453, EPI_ISL_883454, EPI_ISL_883455, EPI_ISL_883456, EPI_ISL_883457, EPI_ISL_883458, EPI_ISL_883459, EPI_ISL_883460, EPI_ISL_883461, EPI_ISL_883462, EPI_ISL_883463, EPI_ISL_883464, EPI_ISL_883465, EPI_ISL_883466, EPI_ISL_883467, EPI_ISL_883468, EPI_ISL_883469, EPI_ISL_883470, EPI_ISL_883471, EPI_ISL_883472 |                                                       |                                                       |                                                                                                                                                                               |
| see above                                                                                                                                                                                                                                                                                                                                                                                                                                                      | NORTHWELL HEALTH LABORATORIES                         | Wadsworth Center, New York State Department of Health | Kirsten St. George, Daryl M. Lamson, Alexis Russel, Matthew Shudt, Melissa A Leisner, Jonathan Plitnick, Navjot Singh, John Kelly, Erasmus Schneider, Erica Lasek-Nesselquist |
| EPI_ISL_883473                                                                                                                                                                                                                                                                                                                                                                                                                                                 | ADIRONDACK MEDICAL CENTER                             | Wadsworth Center, New York State Department of Health | Kirsten St. George, Daryl M. Lamson, Alexis Russel, Matthew Shudt, Melissa A Leisner, Jonathan Plitnick, Navjot Singh, John Kelly, Erasmus Schneider, Erica Lasek-Nesselquist |
| EPI_ISL_883474, EPI_ISL_883475, EPI_ISL_883476, EPI_ISL_883477, EPI_ISL_883478, EPI_ISL_883479, EPI_ISL_883480, EPI_ISL_883481, EPI_ISL_883482, EPI_ISL_883483, EPI_ISL_883484, EPI_ISL_883485, EPI_ISL_883486, EPI_ISL_883487, EPI_ISL_883488, EPI_ISL_883489, EPI_ISL_883490, EPI_ISL_883491, EPI_ISL_883492, EPI_ISL_883493, EPI_ISL_883494, EPI_ISL_883495, EPI_ISL_883496, EPI_ISL_883497, EPI_ISL_883498                                                 |                                                       |                                                       |                                                                                                                                                                               |
| see above                                                                                                                                                                                                                                                                                                                                                                                                                                                      | NORTHWELL HEALTH LABORATORIES                         | Wadsworth Center, New York State Department of Health | Kirsten St. George, Daryl M. Lamson, Alexis Russel, Matthew Shudt, Melissa A Leisner, Jonathan Plitnick, Navjot Singh, John Kelly, Erasmus Schneider, Erica Lasek-Nesselquist |
| EPI_ISL_884008, EPI_ISL_884009, EPI_ISL_884010, EPI_ISL_884011, EPI_ISL_884012                                                                                                                                                                                                                                                                                                                                                                                 | ALBANY MEDICAL CENTER HOSPITAL CLINICAL LABORATORIES  | Wadsworth Center, New York State Department of Health | Kirsten St. George, Daryl M. Lamson, Alexis Russel, Matthew Shudt, Melissa A Leisner, Jonathan Plitnick, Navjot Singh, John Kelly, Erasmus Schneider, Erica Lasek-Nesselquist |
| EPI_ISL_884013, EPI_ISL_884014, EPI_ISL_884015, EPI_ISL_884016                                                                                                                                                                                                                                                                                                                                                                                                 | Wadsworth Center, New York State Department of Health | Wadsworth Center, New York State Department of Health | Kirsten St. George, Daryl M. Lamson, Alexis Russel, Matthew Shudt, Melissa A Leisner, Jonathan Plitnick, Navjot Singh, John Kelly, Erasmus Schneider, Erica Lasek-Nesselquist |
| EPI_ISL_884017, EPI_ISL_884018, EPI_ISL_884019, EPI_ISL_884020, EPI_ISL_884021, EPI_ISL_884022, EPI_ISL_884023, EPI_ISL_884024, EPI_ISL_884025, EPI_ISL_884026, EPI_ISL_884027, EPI_ISL_884028, EPI_ISL_884029, EPI_ISL_884030, EPI_ISL_884031                                                                                                                                                                                                                 |                                                       |                                                       |                                                                                                                                                                               |
| see above                                                                                                                                                                                                                                                                                                                                                                                                                                                      | ALBANY MEDICAL CENTER HOSPITAL CLINICAL LABORATORIES  | Wadsworth Center, New York State Department of Health | Kirsten St. George, Daryl M. Lamson, Alexis Russel, Matthew Shudt, Melissa A Leisner, Jonathan Plitnick, Navjot Singh, John Kelly, Erasmus Schneider, Erica Lasek-Nesselquist |
| EPI_ISL_884032, EPI_ISL_884033, EPI_ISL_884034, EPI_ISL_884035, EPI_ISL_884036, EPI_ISL_884037, EPI_ISL_884038, EPI_ISL_884039, EPI_ISL_884040, EPI_ISL_884041                                                                                                                                                                                                                                                                                                 | Wadsworth Center, New York State Department of Health | Wadsworth Center, New York State Department of Health | Kirsten St. George, Daryl M. Lamson, Alexis Russel, Matthew Shudt, Melissa A Leisner, Jonathan Plitnick, Navjot Singh, John Kelly, Erasmus Schneider, Erica Lasek-Nesselquist |

|                                                                                                                                                                                                                                                                                                                                                                                                                                                                                                                                                                                                                                                                                                                                                                                                                                                |                                                                                                                                       |                                                                                                                                                                                                                                                                                                                                                                                                                                                                                                                                                                                                                                                                                                                                                                                                                                                      |                                                                                                                                                                                                                                                                                                                                                                                                                                  |
|------------------------------------------------------------------------------------------------------------------------------------------------------------------------------------------------------------------------------------------------------------------------------------------------------------------------------------------------------------------------------------------------------------------------------------------------------------------------------------------------------------------------------------------------------------------------------------------------------------------------------------------------------------------------------------------------------------------------------------------------------------------------------------------------------------------------------------------------|---------------------------------------------------------------------------------------------------------------------------------------|------------------------------------------------------------------------------------------------------------------------------------------------------------------------------------------------------------------------------------------------------------------------------------------------------------------------------------------------------------------------------------------------------------------------------------------------------------------------------------------------------------------------------------------------------------------------------------------------------------------------------------------------------------------------------------------------------------------------------------------------------------------------------------------------------------------------------------------------------|----------------------------------------------------------------------------------------------------------------------------------------------------------------------------------------------------------------------------------------------------------------------------------------------------------------------------------------------------------------------------------------------------------------------------------|
| EPI_ISL_884042, EPI_ISL_884043, EPI_ISL_884044, EPI_ISL_884045, EPI_ISL_884046                                                                                                                                                                                                                                                                                                                                                                                                                                                                                                                                                                                                                                                                                                                                                                 | ALBANY MEDICAL CENTER HOSPITAL CLINICAL LABORATORIES                                                                                  | Wadsworth Center, New York State Department of Health                                                                                                                                                                                                                                                                                                                                                                                                                                                                                                                                                                                                                                                                                                                                                                                                | Kirsten St. George, Daryl M. Lamson, Alexis Russel, Matthew Shudt, Melissa A Leisner, Jonathan Plitnick, Navjot Singh, John Kelly, Erasmus Schneider, Erica Lasek-Nesselquist                                                                                                                                                                                                                                                    |
| EPI_ISL_884047                                                                                                                                                                                                                                                                                                                                                                                                                                                                                                                                                                                                                                                                                                                                                                                                                                 | Wadsworth Center, New York State Department of Health                                                                                 | Wadsworth Center, New York State Department of Health                                                                                                                                                                                                                                                                                                                                                                                                                                                                                                                                                                                                                                                                                                                                                                                                | Kirsten St. George, Daryl M. Lamson, Alexis Russel, Matthew Shudt, Melissa A Leisner, Jonathan Plitnick, Navjot Singh, John Kelly, Erasmus Schneider, Erica Lasek-Nesselquist                                                                                                                                                                                                                                                    |
| EPI_ISL_884048, EPI_ISL_884049, EPI_ISL_884050, EPI_ISL_884051, EPI_ISL_884052, EPI_ISL_884053                                                                                                                                                                                                                                                                                                                                                                                                                                                                                                                                                                                                                                                                                                                                                 | ALBANY MEDICAL CENTER HOSPITAL CLINICAL LABORATORIES                                                                                  | Wadsworth Center, New York State Department of Health                                                                                                                                                                                                                                                                                                                                                                                                                                                                                                                                                                                                                                                                                                                                                                                                | Kirsten St. George, Daryl M. Lamson, Alexis Russel, Matthew Shudt, Melissa A Leisner, Jonathan Plitnick, Navjot Singh, John Kelly, Erasmus Schneider, Erica Lasek-Nesselquist                                                                                                                                                                                                                                                    |
| EPI_ISL_884054                                                                                                                                                                                                                                                                                                                                                                                                                                                                                                                                                                                                                                                                                                                                                                                                                                 | TEMPUS LABS INC                                                                                                                       | Wadsworth Center, New York State Department of Health                                                                                                                                                                                                                                                                                                                                                                                                                                                                                                                                                                                                                                                                                                                                                                                                | Kirsten St. George, Daryl M. Lamson, Alexis Russel, Matthew Shudt, Melissa A Leisner, Jonathan Plitnick, Navjot Singh, John Kelly, Erasmus Schneider, Erica Lasek-Nesselquist                                                                                                                                                                                                                                                    |
| EPI_ISL_884055, EPI_ISL_884056, EPI_ISL_884057, EPI_ISL_884058                                                                                                                                                                                                                                                                                                                                                                                                                                                                                                                                                                                                                                                                                                                                                                                 | Wadsworth Center, New York State Department of Health                                                                                 | Wadsworth Center, New York State Department of Health                                                                                                                                                                                                                                                                                                                                                                                                                                                                                                                                                                                                                                                                                                                                                                                                | Kirsten St. George, Daryl M. Lamson, Alexis Russel, Matthew Shudt, Melissa A Leisner, Jonathan Plitnick, Navjot Singh, John Kelly, Erasmus Schneider, Erica Lasek-Nesselquist                                                                                                                                                                                                                                                    |
| EPI_ISL_884059, EPI_ISL_884060, EPI_ISL_884061, EPI_ISL_884062, EPI_ISL_884063, EPI_ISL_884064, EPI_ISL_884065, EPI_ISL_884066, EPI_ISL_884067, EPI_ISL_884068, EPI_ISL_884069, EPI_ISL_884070, EPI_ISL_884071, EPI_ISL_884072, EPI_ISL_884073, EPI_ISL_884074, EPI_ISL_884075, EPI_ISL_884076, EPI_ISL_884077, EPI_ISL_884078, EPI_ISL_884079                                                                                                                                                                                                                                                                                                                                                                                                                                                                                                 | ALBANY MEDICAL CENTER HOSPITAL CLINICAL LABORATORIES                                                                                  | Wadsworth Center, New York State Department of Health                                                                                                                                                                                                                                                                                                                                                                                                                                                                                                                                                                                                                                                                                                                                                                                                | Kirsten St. George, Daryl M. Lamson, Alexis Russel, Matthew Shudt, Melissa A Leisner, Jonathan Plitnick, Navjot Singh, John Kelly, Erasmus Schneider, Erica Lasek-Nesselquist                                                                                                                                                                                                                                                    |
| see above                                                                                                                                                                                                                                                                                                                                                                                                                                                                                                                                                                                                                                                                                                                                                                                                                                      | ALBANY MEDICAL CENTER HOSPITAL CLINICAL LABORATORIES                                                                                  | Wadsworth Center, New York State Department of Health                                                                                                                                                                                                                                                                                                                                                                                                                                                                                                                                                                                                                                                                                                                                                                                                | Kirsten St. George, Daryl M. Lamson, Alexis Russel, Matthew Shudt, Melissa A Leisner, Jonathan Plitnick, Navjot Singh, John Kelly, Erasmus Schneider, Erica Lasek-Nesselquist                                                                                                                                                                                                                                                    |
| EPI_ISL_884080                                                                                                                                                                                                                                                                                                                                                                                                                                                                                                                                                                                                                                                                                                                                                                                                                                 | Wadsworth Center, New York State Department of Health                                                                                 | Wadsworth Center, New York State Department of Health                                                                                                                                                                                                                                                                                                                                                                                                                                                                                                                                                                                                                                                                                                                                                                                                | Kirsten St. George, Daryl M. Lamson, Alexis Russel, Matthew Shudt, Melissa A Leisner, Jonathan Plitnick, Navjot Singh, John Kelly, Erasmus Schneider, Erica Lasek-Nesselquist                                                                                                                                                                                                                                                    |
| EPI_ISL_884081, EPI_ISL_884082, EPI_ISL_884083, EPI_ISL_884084, EPI_ISL_884085                                                                                                                                                                                                                                                                                                                                                                                                                                                                                                                                                                                                                                                                                                                                                                 | ALBANY MEDICAL CENTER HOSPITAL CLINICAL LABORATORIES                                                                                  | Wadsworth Center, New York State Department of Health                                                                                                                                                                                                                                                                                                                                                                                                                                                                                                                                                                                                                                                                                                                                                                                                | Kirsten St. George, Daryl M. Lamson, Alexis Russel, Matthew Shudt, Melissa A Leisner, Jonathan Plitnick, Navjot Singh, John Kelly, Erasmus Schneider, Erica Lasek-Nesselquist                                                                                                                                                                                                                                                    |
| EPI_ISL_884086                                                                                                                                                                                                                                                                                                                                                                                                                                                                                                                                                                                                                                                                                                                                                                                                                                 | Wadsworth Center, New York State Department of Health                                                                                 | Wadsworth Center, New York State Department of Health                                                                                                                                                                                                                                                                                                                                                                                                                                                                                                                                                                                                                                                                                                                                                                                                | Kirsten St. George, Daryl M. Lamson, Alexis Russel, Matthew Shudt, Melissa A Leisner, Jonathan Plitnick, Navjot Singh, John Kelly, Erasmus Schneider, Erica Lasek-Nesselquist                                                                                                                                                                                                                                                    |
| EPI_ISL_884390, EPI_ISL_884391, EPI_ISL_884392, EPI_ISL_884393                                                                                                                                                                                                                                                                                                                                                                                                                                                                                                                                                                                                                                                                                                                                                                                 | Infectious Diseases, Quest Diagnostics                                                                                                | Infectious Diseases, Quest Diagnostics                                                                                                                                                                                                                                                                                                                                                                                                                                                                                                                                                                                                                                                                                                                                                                                                               | Rosenthal,S.H., Gerasimova,A., Kagan,R.M., Anderson,B., Bernstein,L.E., Livingston,K.E., Hua,M., Liu,Y., Shalhout,D.F., Owen,R., Lacbawan,F.                                                                                                                                                                                                                                                                                     |
| EPI_ISL_884713, EPI_ISL_884795                                                                                                                                                                                                                                                                                                                                                                                                                                                                                                                                                                                                                                                                                                                                                                                                                 | Respiratory Viruses Branch, Centers for Disease Control and Prevention                                                                | Respiratory Viruses Branch, Centers for Disease Control and Prevention                                                                                                                                                                                                                                                                                                                                                                                                                                                                                                                                                                                                                                                                                                                                                                               | Cook,P.W., Batra,D., Rambo-Martin,B.L., de Feo,E., Antico,J., Tran,C., Tolentino,M., Wickline,S., Gietzen,K., Sickler,B., Liu,J., Allen,E., Febbo,P., Galloway,S., Washington,N.L., White,S., Levan,G., Barret,K.S., Cirulli,E., Bolze,A., Ascencio,A., Rivera-Garcia,C., Cho,R., Nguyen,J., Wang,S., Ramirez,J., Cassens,T., Sandoval,E., Isaksson,M., Lee,W., Becker,D., Laurent,M., Lu,J., Paden,C.R., Tong,S., MacCannell,D. |
| EPI_ISL_886231, EPI_ISL_886365, EPI_ISL_886366, EPI_ISL_886405, EPI_ISL_886508, EPI_ISL_886563, EPI_ISL_886666, EPI_ISL_886772, EPI_ISL_886830, EPI_ISL_886837, EPI_ISL_886838, EPI_ISL_886892, EPI_ISL_886918, EPI_ISL_886920, EPI_ISL_886927, EPI_ISL_886991, EPI_ISL_886998, EPI_ISL_887004, EPI_ISL_887034, EPI_ISL_887036, EPI_ISL_887046, EPI_ISL_887075, EPI_ISL_887087, EPI_ISL_887102, EPI_ISL_887601, EPI_ISL_887612, EPI_ISL_887631, EPI_ISL_887660, EPI_ISL_887662, EPI_ISL_887665, EPI_ISL_887711, EPI_ISL_887770, EPI_ISL_887792, EPI_ISL_887814, EPI_ISL_887894, EPI_ISL_888114, EPI_ISL_888141, EPI_ISL_888144, EPI_ISL_888146, EPI_ISL_888172, EPI_ISL_888229, EPI_ISL_888271, EPI_ISL_888349, EPI_ISL_888367, EPI_ISL_888405, EPI_ISL_888416, EPI_ISL_888452, EPI_ISL_888456, EPI_ISL_888481, EPI_ISL_888513, EPI_ISL_888562 | Labcorp<br>Genomics and Discovery, Respiratory Viruses Branch, Division of Viral Diseases, Centers for Disease Control and Prevention | Peter W. Cook,Dhwani Batra,Ben L. Rambo-Martin,Summer Galloway,Brian Krueger,Minoo Agarwal,Eyad Almasri,Debbie Boles,Ayla Burns,Nuthawin Charoensri,Oren Cohen,Susan Countryman,Mary Ann Cristobal,Bobbi Crox,Suzanne Daie,Hrushikesh Deshmukh,Amanda Douglas,Vincent Drouillon,Marcia Eisenberg,Howard Engler,Rama Ghatti,Prashant Gupta,Susan Hicks,Jake Humphrey,Lax Iyer,Manoj Jain,Mohan Koli,Tim Kuphal,Stanley Letovsky,Michael Levandoski,Craig Lukasik,Jonathan Meltzer,Brian Norvell,Mindy Nye,Scott Parker,Christos Petropoulos,John Pruitt,Steven Ragan,Scott Ryan,Mike Sapeta,Jana Schroth,Suresh Babu Selvaraju,Goran Stevcovic,Amanda Suchanek,Andrea Throop,Lyndon Tilson,Thomas Urban,Joe Voshell,Kimberly Wagner,Jonathan Williams,Mary Williamson,Qian Zeng,Tricia Zwielfelhofer,Clinton R. Paden,Suxiang Tong,Duncan MacCannell, |                                                                                                                                                                                                                                                                                                                                                                                                                                  |
| EPI_ISL_896216, EPI_ISL_896217                                                                                                                                                                                                                                                                                                                                                                                                                                                                                                                                                                                                                                                                                                                                                                                                                 | Columbia University Irving Medical Center                                                                                             | Wadsworth Center, New York State Department of Health                                                                                                                                                                                                                                                                                                                                                                                                                                                                                                                                                                                                                                                                                                                                                                                                | Kirsten St. George, Daryl M. Lamson, Alexis Russel, Matthew Shudt, Melissa A Leisner, Jonathan Plitnick, Navjot Singh, John Kelly, Erasmus Schneider, Erica Lasek-Nesselquist                                                                                                                                                                                                                                                    |
| EPI_ISL_896218, EPI_ISL_896219, EPI_ISL_896220, EPI_ISL_896221, EPI_ISL_896222, EPI_ISL_896223, EPI_ISL_896224, EPI_ISL_896225                                                                                                                                                                                                                                                                                                                                                                                                                                                                                                                                                                                                                                                                                                                 | SUNY UPSTATE MEDICAL UNIVERSITY                                                                                                       | Wadsworth Center, New York State Department of Health                                                                                                                                                                                                                                                                                                                                                                                                                                                                                                                                                                                                                                                                                                                                                                                                | Kirsten St. George, Daryl M. Lamson, Alexis Russel, Matthew Shudt, Melissa A Leisner, Jonathan Plitnick, Navjot Singh, John Kelly, Erasmus Schneider, Erica Lasek-Nesselquist                                                                                                                                                                                                                                                    |
| EPI_ISL_896226                                                                                                                                                                                                                                                                                                                                                                                                                                                                                                                                                                                                                                                                                                                                                                                                                                 | TEMPUS LABS INC                                                                                                                       | Wadsworth Center, New York State Department of Health                                                                                                                                                                                                                                                                                                                                                                                                                                                                                                                                                                                                                                                                                                                                                                                                | Kirsten St. George, Daryl M. Lamson, Alexis Russel, Matthew Shudt, Melissa A Leisner, Jonathan Plitnick, Navjot Singh, John Kelly, Erasmus Schneider, Erica Lasek-Nesselquist                                                                                                                                                                                                                                                    |
| EPI_ISL_896227                                                                                                                                                                                                                                                                                                                                                                                                                                                                                                                                                                                                                                                                                                                                                                                                                                 | Columbia University Irving Medical Center                                                                                             | Wadsworth Center, New York State Department of Health                                                                                                                                                                                                                                                                                                                                                                                                                                                                                                                                                                                                                                                                                                                                                                                                | Kirsten St. George, Daryl M. Lamson, Alexis Russel, Matthew Shudt, Melissa A Leisner, Jonathan Plitnick, Navjot Singh, John Kelly, Erasmus Schneider, Erica Lasek-Nesselquist                                                                                                                                                                                                                                                    |
| EPI_ISL_896228, EPI_ISL_896229, EPI_ISL_896230                                                                                                                                                                                                                                                                                                                                                                                                                                                                                                                                                                                                                                                                                                                                                                                                 | SUNY UPSTATE MEDICAL UNIVERSITY                                                                                                       | Wadsworth Center, New York State Department of Health                                                                                                                                                                                                                                                                                                                                                                                                                                                                                                                                                                                                                                                                                                                                                                                                | Kirsten St. George, Daryl M. Lamson, Alexis Russel, Matthew Shudt, Melissa A Leisner, Jonathan Plitnick, Navjot Singh, John Kelly, Erasmus Schneider, Erica Lasek-Nesselquist                                                                                                                                                                                                                                                    |
| EPI_ISL_896231, EPI_ISL_896232, EPI_ISL_896233, EPI_ISL_896234                                                                                                                                                                                                                                                                                                                                                                                                                                                                                                                                                                                                                                                                                                                                                                                 | Columbia University Irving Medical Center                                                                                             | Wadsworth Center, New York State Department of Health                                                                                                                                                                                                                                                                                                                                                                                                                                                                                                                                                                                                                                                                                                                                                                                                | Kirsten St. George, Daryl M. Lamson, Alexis Russel, Matthew Shudt, Melissa A Leisner, Jonathan Plitnick, Navjot Singh, John Kelly, Erasmus Schneider, Erica Lasek-Nesselquist                                                                                                                                                                                                                                                    |
| EPI_ISL_896235                                                                                                                                                                                                                                                                                                                                                                                                                                                                                                                                                                                                                                                                                                                                                                                                                                 | SUNY UPSTATE MEDICAL UNIVERSITY                                                                                                       | Wadsworth Center, New York State Department of Health                                                                                                                                                                                                                                                                                                                                                                                                                                                                                                                                                                                                                                                                                                                                                                                                | Kirsten St. George, Daryl M. Lamson, Alexis Russel, Matthew Shudt, Melissa A Leisner, Jonathan Plitnick, Navjot Singh, John Kelly, Erasmus Schneider, Erica Lasek-Nesselquist                                                                                                                                                                                                                                                    |
| EPI_ISL_896236, EPI_ISL_896237, EPI_ISL_896238, EPI_ISL_896239, EPI_ISL_896240, EPI_ISL_896241, EPI_ISL_896242, EPI_ISL_896243, EPI_ISL_896244, EPI_ISL_896245, EPI_ISL_896246                                                                                                                                                                                                                                                                                                                                                                                                                                                                                                                                                                                                                                                                 | Columbia University Irving Medical Center                                                                                             | Wadsworth Center, New York State Department of Health                                                                                                                                                                                                                                                                                                                                                                                                                                                                                                                                                                                                                                                                                                                                                                                                | Kirsten St. George, Daryl M. Lamson, Alexis Russel, Matthew Shudt, Melissa A Leisner, Jonathan Plitnick, Navjot Singh, John Kelly, Erasmus Schneider, Erica Lasek-Nesselquist                                                                                                                                                                                                                                                    |
| see above                                                                                                                                                                                                                                                                                                                                                                                                                                                                                                                                                                                                                                                                                                                                                                                                                                      | Columbia University Irving Medical Center                                                                                             | Wadsworth Center, New York State Department of Health                                                                                                                                                                                                                                                                                                                                                                                                                                                                                                                                                                                                                                                                                                                                                                                                | Kirsten St. George, Daryl M. Lamson, Alexis Russel, Matthew Shudt, Melissa A Leisner, Jonathan Plitnick, Navjot Singh, John Kelly, Erasmus Schneider, Erica Lasek-Nesselquist                                                                                                                                                                                                                                                    |
| EPI_ISL_896247, EPI_ISL_896248, EPI_ISL_896249, EPI_ISL_896250, EPI_ISL_896251, EPI_ISL_896252, EPI_ISL_896253, EPI_ISL_896254, EPI_ISL_896255, EPI_ISL_896256, EPI_ISL_896257, EPI_ISL_896258, EPI_ISL_896259, EPI_ISL_896260, EPI_ISL_896261, EPI_ISL_896262, EPI_ISL_896263, EPI_ISL_896264, EPI_ISL_896265, EPI_ISL_896266, EPI_ISL_896267, EPI_ISL_896268, EPI_ISL_896269, EPI_ISL_896270, EPI_ISL_896271, EPI_ISL_896272, EPI_ISL_896273, EPI_ISL_896274, EPI_ISL_896275, EPI_ISL_896276, EPI_ISL_896277, EPI_ISL_896278, EPI_ISL_896279, EPI_ISL_896280, EPI_ISL_896281, EPI_ISL_896282, EPI_ISL_896283, EPI_ISL_896284, EPI_ISL_896285, EPI_ISL_896286, EPI_ISL_896287, EPI_ISL_896288, EPI_ISL_896289, EPI_ISL_896290, EPI_ISL_896291, EPI_ISL_896292, EPI_ISL_896293                                                                 | SUNY UPSTATE MEDICAL UNIVERSITY                                                                                                       | Wadsworth Center, New York State Department of Health                                                                                                                                                                                                                                                                                                                                                                                                                                                                                                                                                                                                                                                                                                                                                                                                | Kirsten St. George, Daryl M. Lamson, Alexis Russel, Matthew Shudt, Melissa A Leisner, Jonathan Plitnick, Navjot Singh, John Kelly, Erasmus Schneider, Erica Lasek-Nesselquist                                                                                                                                                                                                                                                    |
| see above                                                                                                                                                                                                                                                                                                                                                                                                                                                                                                                                                                                                                                                                                                                                                                                                                                      | SUNY UPSTATE MEDICAL UNIVERSITY                                                                                                       | Wadsworth Center, New York State Department of Health                                                                                                                                                                                                                                                                                                                                                                                                                                                                                                                                                                                                                                                                                                                                                                                                | Kirsten St. George, Daryl M. Lamson, Alexis Russel, Matthew Shudt, Melissa A Leisner, Jonathan Plitnick, Navjot Singh, John Kelly, Erasmus Schneider, Erica Lasek-Nesselquist                                                                                                                                                                                                                                                    |
| EPI_ISL_896294                                                                                                                                                                                                                                                                                                                                                                                                                                                                                                                                                                                                                                                                                                                                                                                                                                 | New York Presbyterian Hospital                                                                                                        | Wadsworth Center, New York State Department of Health                                                                                                                                                                                                                                                                                                                                                                                                                                                                                                                                                                                                                                                                                                                                                                                                | Kirsten St. George, Daryl M. Lamson, Alexis Russel, Matthew Shudt, Melissa A Leisner, Jonathan Plitnick, Navjot Singh, John Kelly, Erasmus Schneider, Erica Lasek-Nesselquist                                                                                                                                                                                                                                                    |
| EPI_ISL_896295                                                                                                                                                                                                                                                                                                                                                                                                                                                                                                                                                                                                                                                                                                                                                                                                                                 | MEMORIAL SLOAN KETTERING CANCER CENTER                                                                                                | Wadsworth Center, New York State Department of Health                                                                                                                                                                                                                                                                                                                                                                                                                                                                                                                                                                                                                                                                                                                                                                                                | Kirsten St. George, Daryl M. Lamson, Alexis Russel, Matthew Shudt, Melissa A Leisner, Jonathan Plitnick, Navjot Singh, John Kelly, Erasmus Schneider, Erica Lasek-Nesselquist                                                                                                                                                                                                                                                    |
| EPI_ISL_896296                                                                                                                                                                                                                                                                                                                                                                                                                                                                                                                                                                                                                                                                                                                                                                                                                                 | New York Presbyterian Hospital                                                                                                        | Wadsworth Center, New York State Department of Health                                                                                                                                                                                                                                                                                                                                                                                                                                                                                                                                                                                                                                                                                                                                                                                                | Kirsten St. George, Daryl M. Lamson, Alexis Russel, Matthew Shudt, Melissa A Leisner, Jonathan Plitnick, Navjot Singh, John Kelly, Erasmus Schneider, Erica Lasek-Nesselquist                                                                                                                                                                                                                                                    |
| EPI_ISL_896297                                                                                                                                                                                                                                                                                                                                                                                                                                                                                                                                                                                                                                                                                                                                                                                                                                 | BIO-REFERENCE LABORATORIES                                                                                                            | Wadsworth Center, New York State Department of Health                                                                                                                                                                                                                                                                                                                                                                                                                                                                                                                                                                                                                                                                                                                                                                                                | Kirsten St. George, Daryl M. Lamson, Alexis Russel, Matthew Shudt, Melissa A Leisner, Jonathan Plitnick, Navjot Singh, John Kelly, Erasmus Schneider, Erica Lasek-Nesselquist                                                                                                                                                                                                                                                    |
| EPI_ISL_896298                                                                                                                                                                                                                                                                                                                                                                                                                                                                                                                                                                                                                                                                                                                                                                                                                                 | New York Presbyterian Hospital                                                                                                        | Wadsworth Center, New York State Department of Health                                                                                                                                                                                                                                                                                                                                                                                                                                                                                                                                                                                                                                                                                                                                                                                                | Kirsten St. George, Daryl M. Lamson, Alexis Russel, Matthew Shudt, Melissa A Leisner, Jonathan Plitnick, Navjot Singh, John Kelly, Erasmus Schneider, Erica Lasek-Nesselquist                                                                                                                                                                                                                                                    |
| EPI_ISL_896299                                                                                                                                                                                                                                                                                                                                                                                                                                                                                                                                                                                                                                                                                                                                                                                                                                 | MEMORIAL SLOAN KETTERING CANCER CENTER                                                                                                | Wadsworth Center, New York State Department of Health                                                                                                                                                                                                                                                                                                                                                                                                                                                                                                                                                                                                                                                                                                                                                                                                | Kirsten St. George, Daryl M. Lamson, Alexis Russel, Matthew Shudt, Melissa A Leisner, Jonathan Plitnick, Navjot Singh, John Kelly, Erasmus Schneider, Erica Lasek-Nesselquist                                                                                                                                                                                                                                                    |



|                                                                                                                                                                                                                                                                                                                                                                                                                                                                                                |                                           |                                                                                                                            |                                                                                                                                                                                                                                                                         |
|------------------------------------------------------------------------------------------------------------------------------------------------------------------------------------------------------------------------------------------------------------------------------------------------------------------------------------------------------------------------------------------------------------------------------------------------------------------------------------------------|-------------------------------------------|----------------------------------------------------------------------------------------------------------------------------|-------------------------------------------------------------------------------------------------------------------------------------------------------------------------------------------------------------------------------------------------------------------------|
| EPI_ISL_896534                                                                                                                                                                                                                                                                                                                                                                                                                                                                                 | New York Presbyterian Hospital            | Wadsworth Center, New York State Department of Health                                                                      | Kirsten St. George, Daryl M. Lamson, Alexis Russel, Matthew Shudt, Melissa A Leisner, Jonathan Plitnick, Navjot Singh, John Kelly, Erasmus Schneider, Erica Lasek-Nesselquist                                                                                           |
| EPI_ISL_896535, EPI_ISL_896536                                                                                                                                                                                                                                                                                                                                                                                                                                                                 | MEMORIAL SLOAN KETTERING CANCER CENTER    | Wadsworth Center, New York State Department of Health                                                                      | Kirsten St. George, Daryl M. Lamson, Alexis Russel, Matthew Shudt, Melissa A Leisner, Jonathan Plitnick, Navjot Singh, John Kelly, Erasmus Schneider, Erica Lasek-Nesselquist                                                                                           |
| EPI_ISL_896537, EPI_ISL_896538, EPI_ISL_896539, EPI_ISL_896540                                                                                                                                                                                                                                                                                                                                                                                                                                 | New York Presbyterian Hospital            | Wadsworth Center, New York State Department of Health                                                                      | Kirsten St. George, Daryl M. Lamson, Alexis Russel, Matthew Shudt, Melissa A Leisner, Jonathan Plitnick, Navjot Singh, John Kelly, Erasmus Schneider, Erica Lasek-Nesselquist                                                                                           |
| EPI_ISL_896541, EPI_ISL_896542, EPI_ISL_896543, EPI_ISL_896544, EPI_ISL_896545, EPI_ISL_896546, EPI_ISL_896547, EPI_ISL_896548                                                                                                                                                                                                                                                                                                                                                                 | MEMORIAL SLOAN KETTERING CANCER CENTER    | Wadsworth Center, New York State Department of Health                                                                      | Kirsten St. George, Daryl M. Lamson, Alexis Russel, Matthew Shudt, Melissa A Leisner, Jonathan Plitnick, Navjot Singh, John Kelly, Erasmus Schneider, Erica Lasek-Nesselquist                                                                                           |
| EPI_ISL_896549, EPI_ISL_896550, EPI_ISL_896551                                                                                                                                                                                                                                                                                                                                                                                                                                                 | New York Presbyterian Hospital            | Wadsworth Center, New York State Department of Health                                                                      | Kirsten St. George, Daryl M. Lamson, Alexis Russel, Matthew Shudt, Melissa A Leisner, Jonathan Plitnick, Navjot Singh, John Kelly, Erasmus Schneider, Erica Lasek-Nesselquist                                                                                           |
| EPI_ISL_896552                                                                                                                                                                                                                                                                                                                                                                                                                                                                                 | MEMORIAL SLOAN KETTERING CANCER CENTER    | Wadsworth Center, New York State Department of Health                                                                      | Kirsten St. George, Daryl M. Lamson, Alexis Russel, Matthew Shudt, Melissa A Leisner, Jonathan Plitnick, Navjot Singh, John Kelly, Erasmus Schneider, Erica Lasek-Nesselquist                                                                                           |
| EPI_ISL_896553, EPI_ISL_896554                                                                                                                                                                                                                                                                                                                                                                                                                                                                 | New York Presbyterian Hospital            | Wadsworth Center, New York State Department of Health                                                                      | Kirsten St. George, Daryl M. Lamson, Alexis Russel, Matthew Shudt, Melissa A Leisner, Jonathan Plitnick, Navjot Singh, John Kelly, Erasmus Schneider, Erica Lasek-Nesselquist                                                                                           |
| EPI_ISL_896555                                                                                                                                                                                                                                                                                                                                                                                                                                                                                 | MEMORIAL SLOAN KETTERING CANCER CENTER    | Wadsworth Center, New York State Department of Health                                                                      | Kirsten St. George, Daryl M. Lamson, Alexis Russel, Matthew Shudt, Melissa A Leisner, Jonathan Plitnick, Navjot Singh, John Kelly, Erasmus Schneider, Erica Lasek-Nesselquist                                                                                           |
| EPI_ISL_896556, EPI_ISL_896557, EPI_ISL_896558, EPI_ISL_896559, EPI_ISL_896560, EPI_ISL_896561                                                                                                                                                                                                                                                                                                                                                                                                 | New York Presbyterian Hospital            | Wadsworth Center, New York State Department of Health                                                                      | Kirsten St. George, Daryl M. Lamson, Alexis Russel, Matthew Shudt, Melissa A Leisner, Jonathan Plitnick, Navjot Singh, John Kelly, Erasmus Schneider, Erica Lasek-Nesselquist                                                                                           |
| EPI_ISL_896562                                                                                                                                                                                                                                                                                                                                                                                                                                                                                 | MEMORIAL SLOAN KETTERING CANCER CENTER    | Wadsworth Center, New York State Department of Health                                                                      | Kirsten St. George, Daryl M. Lamson, Alexis Russel, Matthew Shudt, Melissa A Leisner, Jonathan Plitnick, Navjot Singh, John Kelly, Erasmus Schneider, Erica Lasek-Nesselquist                                                                                           |
| EPI_ISL_896563, EPI_ISL_896564, EPI_ISL_896565, EPI_ISL_896566, EPI_ISL_896567, EPI_ISL_896568, EPI_ISL_896569                                                                                                                                                                                                                                                                                                                                                                                 | URMC LABS                                 | Wadsworth Center, New York State Department of Health                                                                      | Kirsten St. George, Daryl M. Lamson, Alexis Russel, Matthew Shudt, Melissa A Leisner, Jonathan Plitnick, Navjot Singh, John Kelly, Erasmus Schneider, Erica Lasek-Nesselquist                                                                                           |
| EPI_ISL_896570, EPI_ISL_896571                                                                                                                                                                                                                                                                                                                                                                                                                                                                 | MEMORIAL SLOAN KETTERING CANCER CENTER    | Wadsworth Center, New York State Department of Health                                                                      | Kirsten St. George, Daryl M. Lamson, Alexis Russel, Matthew Shudt, Melissa A Leisner, Jonathan Plitnick, Navjot Singh, John Kelly, Erasmus Schneider, Erica Lasek-Nesselquist                                                                                           |
| EPI_ISL_903950, EPI_ISL_903977                                                                                                                                                                                                                                                                                                                                                                                                                                                                 | NYSDOH Wadsworth Center, Virology Lab     | Genomics and Discovery, Respiratory Viruses Branch, Division of Viral Diseases, Centers for Disease Control and Prevention | Krista Queen, Yan Li, Ying Tao, Jing Zhang, Anna Uehara, Anna Montmayer, Clinton R. Paden, Peter W. Cook, Rachel Marine, Mili Sheth, Jasmine Padilla, Sarah Nobles, Mark Burroughs, Lori Rowe, Haibin Wang, Ben L. Rambo-Martin, Dhvani Batra, Justin Lee, Suxiang Tong |
| EPI_ISL_912169                                                                                                                                                                                                                                                                                                                                                                                                                                                                                 | East Gene                                 | Grubaugh Lab - Yale School of Public Health                                                                                | Tara Alpert, Joseph Fauver, Anderson Brito, Mallery Breban, Anne Wylie, Chantal Vogels, Mary Petrone, Annie Watkins, Chaney Kalinich, Isabel Ott, Nathan Grubaugh                                                                                                       |
| EPI_ISL_915340, EPI_ISL_915341, EPI_ISL_915342, EPI_ISL_915343, EPI_ISL_915344, EPI_ISL_915345                                                                                                                                                                                                                                                                                                                                                                                                 | Quest Diagnostics                         | Quest Diagnostics                                                                                                          | Rosenthal,S.H., Gerasimova,A., Kagan,R.M., Anderson, B., Hua, M., Liu Y., Bernstein, L.E., Livingston, K.E., Perez, A., Shalhout, D.F., Shlyakhter, I.A., Owen, R., Tanpaiboon, P., Lactawan, F.                                                                        |
| EPI_ISL_935973, EPI_ISL_935974, EPI_ISL_935975, EPI_ISL_935976, EPI_ISL_935977, EPI_ISL_935978, EPI_ISL_935979, EPI_ISL_935980, EPI_ISL_935981, EPI_ISL_935982, EPI_ISL_935983, EPI_ISL_935984, EPI_ISL_935985, EPI_ISL_935986, EPI_ISL_935987, EPI_ISL_935988, EPI_ISL_935989, EPI_ISL_935990, EPI_ISL_935991, EPI_ISL_935992                                                                                                                                                                 | GLENS FALLS HOSPITAL LABORATORY           | Wadsworth Center, New York State Department of Health                                                                      | Kirsten St. George, Daryl M. Lamson, Alexis Russel, Matthew Shudt, Melissa A Leisner, Jonathan Plitnick, Navjot Singh, John Kelly, Erasmus Schneider, Erica Lasek-Nesselquist                                                                                           |
| see above                                                                                                                                                                                                                                                                                                                                                                                                                                                                                      | GLENS FALLS HOSPITAL LABORATORY           | Wadsworth Center, New York State Department of Health                                                                      | Kirsten St. George, Daryl M. Lamson, Alexis Russel, Matthew Shudt, Melissa A Leisner, Jonathan Plitnick, Navjot Singh, John Kelly, Erasmus Schneider, Erica Lasek-Nesselquist                                                                                           |
| EPI_ISL_935993, EPI_ISL_935994, EPI_ISL_935995, EPI_ISL_935996, EPI_ISL_935997, EPI_ISL_935998, EPI_ISL_935999, EPI_ISL_936000, EPI_ISL_936001, EPI_ISL_936002, EPI_ISL_936003, EPI_ISL_936004, EPI_ISL_936005, EPI_ISL_936006, EPI_ISL_936007, EPI_ISL_936008, EPI_ISL_936009, EPI_ISL_936010, EPI_ISL_936011, EPI_ISL_936012, EPI_ISL_936013, EPI_ISL_936014, EPI_ISL_936015, EPI_ISL_936016, EPI_ISL_936017, EPI_ISL_936018, EPI_ISL_936019, EPI_ISL_936020, EPI_ISL_936021, EPI_ISL_936022 | SUNY UPSTATE MEDICAL UNIVERSITY           | Wadsworth Center, New York State Department of Health                                                                      | Kirsten St. George, Daryl M. Lamson, Alexis Russel, Matthew Shudt, Melissa A Leisner, Jonathan Plitnick, Navjot Singh, John Kelly, Erasmus Schneider, Erica Lasek-Nesselquist                                                                                           |
| see above                                                                                                                                                                                                                                                                                                                                                                                                                                                                                      | SUNY UPSTATE MEDICAL UNIVERSITY           | Wadsworth Center, New York State Department of Health                                                                      | Kirsten St. George, Daryl M. Lamson, Alexis Russel, Matthew Shudt, Melissa A Leisner, Jonathan Plitnick, Navjot Singh, John Kelly, Erasmus Schneider, Erica Lasek-Nesselquist                                                                                           |
| EPI_ISL_936023, EPI_ISL_936024, EPI_ISL_936025, EPI_ISL_936026, EPI_ISL_936027, EPI_ISL_936028, EPI_ISL_936029, EPI_ISL_936030, EPI_ISL_936031, EPI_ISL_936032, EPI_ISL_936033, EPI_ISL_936034, EPI_ISL_936035                                                                                                                                                                                                                                                                                 | THE MARY IMOGENE BASSETT HOSPITAL         | Wadsworth Center, New York State Department of Health                                                                      | Kirsten St. George, Daryl M. Lamson, Alexis Russel, Matthew Shudt, Melissa A Leisner, Jonathan Plitnick, Navjot Singh, John Kelly, Erasmus Schneider, Erica Lasek-Nesselquist                                                                                           |
| see above                                                                                                                                                                                                                                                                                                                                                                                                                                                                                      | THE MARY IMOGENE BASSETT HOSPITAL         | Wadsworth Center, New York State Department of Health                                                                      | Kirsten St. George, Daryl M. Lamson, Alexis Russel, Matthew Shudt, Melissa A Leisner, Jonathan Plitnick, Navjot Singh, John Kelly, Erasmus Schneider, Erica Lasek-Nesselquist                                                                                           |
| EPI_ISL_936036, EPI_ISL_936037, EPI_ISL_936038, EPI_ISL_936039, EPI_ISL_936040, EPI_ISL_936041, EPI_ISL_936042, EPI_ISL_936043, EPI_ISL_936044, EPI_ISL_936045                                                                                                                                                                                                                                                                                                                                 | Columbia University Irving Medical Center | Wadsworth Center, New York State Department of Health                                                                      | Kirsten St. George, Daryl M. Lamson, Alexis Russel, Matthew Shudt, Melissa A Leisner, Jonathan Plitnick, Navjot Singh, John Kelly, Erasmus Schneider, Erica Lasek-Nesselquist                                                                                           |
| EPI_ISL_936046, EPI_ISL_936047, EPI_ISL_936048, EPI_ISL_936049, EPI_ISL_936050, EPI_ISL_936051, EPI_ISL_936052, EPI_ISL_936053, EPI_ISL_936054, EPI_ISL_936055, EPI_ISL_936056, EPI_ISL_936057, EPI_ISL_936058, EPI_ISL_936059                                                                                                                                                                                                                                                                 | ADIRONDACK MEDICAL CENTER                 | Wadsworth Center, New York State Department of Health                                                                      | Kirsten St. George, Daryl M. Lamson, Alexis Russel, Matthew Shudt, Melissa A Leisner, Jonathan Plitnick, Navjot Singh, John Kelly, Erasmus Schneider, Erica Lasek-Nesselquist                                                                                           |
| see above                                                                                                                                                                                                                                                                                                                                                                                                                                                                                      | ADIRONDACK MEDICAL CENTER                 | Wadsworth Center, New York State Department of Health                                                                      | Kirsten St. George, Daryl M. Lamson, Alexis Russel, Matthew Shudt, Melissa A Leisner, Jonathan Plitnick, Navjot Singh, John Kelly, Erasmus Schneider, Erica Lasek-Nesselquist                                                                                           |
| EPI_ISL_936060, EPI_ISL_936061, EPI_ISL_936062                                                                                                                                                                                                                                                                                                                                                                                                                                                 | KALEIDA CENTER FOR LABORATORY MEDICINE    | Wadsworth Center, New York State Department of Health                                                                      | Kirsten St. George, Daryl M. Lamson, Alexis Russel, Matthew Shudt, Melissa A Leisner, Jonathan Plitnick, Navjot Singh, John Kelly, Erasmus Schneider, Erica Lasek-Nesselquist                                                                                           |
| EPI_ISL_936063, EPI_ISL_936064, EPI_ISL_936065, EPI_ISL_936066                                                                                                                                                                                                                                                                                                                                                                                                                                 | Columbia University Irving Medical Center | Wadsworth Center, New York State Department of Health                                                                      | Kirsten St. George, Daryl M. Lamson, Alexis Russel, Matthew Shudt, Melissa A Leisner, Jonathan Plitnick, Navjot Singh, John Kelly, Erasmus Schneider, Erica Lasek-Nesselquist                                                                                           |
| EPI_ISL_936067, EPI_ISL_936068                                                                                                                                                                                                                                                                                                                                                                                                                                                                 | KALEIDA CENTER FOR LABORATORY MEDICINE    | Wadsworth Center, New York State Department of Health                                                                      | Kirsten St. George, Daryl M. Lamson, Alexis Russel, Matthew Shudt, Melissa A Leisner, Jonathan Plitnick, Navjot Singh, John Kelly, Erasmus Schneider, Erica Lasek-Nesselquist                                                                                           |
| EPI_ISL_936069                                                                                                                                                                                                                                                                                                                                                                                                                                                                                 | Columbia University Irving Medical Center | Wadsworth Center, New York State Department of Health                                                                      | Kirsten St. George, Daryl M. Lamson, Alexis Russel, Matthew Shudt, Melissa A Leisner, Jonathan Plitnick, Navjot Singh, John Kelly, Erasmus Schneider, Erica Lasek-Nesselquist                                                                                           |
| EPI_ISL_936070, EPI_ISL_936071, EPI_ISL_936072, EPI_ISL_936073, EPI_ISL_936074, EPI_ISL_936075, EPI_ISL_936076, EPI_ISL_936077, EPI_ISL_936078, EPI_ISL_936079, EPI_ISL_936080, EPI_ISL_936081                                                                                                                                                                                                                                                                                                 | KALEIDA CENTER FOR LABORATORY MEDICINE    | Wadsworth Center, New York State Department of Health                                                                      | Kirsten St. George, Daryl M. Lamson, Alexis Russel, Matthew Shudt, Melissa A Leisner, Jonathan Plitnick, Navjot Singh, John Kelly, Erasmus Schneider, Erica Lasek-Nesselquist                                                                                           |
| see above                                                                                                                                                                                                                                                                                                                                                                                                                                                                                      | KALEIDA CENTER FOR LABORATORY MEDICINE    | Wadsworth Center, New York State Department of Health                                                                      | Kirsten St. George, Daryl M. Lamson, Alexis Russel, Matthew Shudt, Melissa A Leisner, Jonathan Plitnick, Navjot Singh, John Kelly, Erasmus Schneider, Erica Lasek-Nesselquist                                                                                           |
| EPI_ISL_936082                                                                                                                                                                                                                                                                                                                                                                                                                                                                                 | Columbia University Irving Medical Center | Wadsworth Center, New York State Department of Health                                                                      | Kirsten St. George, Daryl M. Lamson, Alexis Russel, Matthew Shudt, Melissa A Leisner, Jonathan Plitnick, Navjot Singh, John Kelly, Erasmus Schneider, Erica Lasek-Nesselquist                                                                                           |
| EPI_ISL_936083, EPI_ISL_936084, EPI_ISL_936085                                                                                                                                                                                                                                                                                                                                                                                                                                                 | KALEIDA CENTER FOR LABORATORY MEDICINE    | Wadsworth Center, New York State Department of Health                                                                      | Kirsten St. George, Daryl M. Lamson, Alexis Russel, Matthew Shudt, Melissa A Leisner, Jonathan Plitnick, Navjot Singh, John Kelly, Erasmus Schneider, Erica Lasek-Nesselquist                                                                                           |





|                                                                                                                                                                                                                                                                                |                                         |                                                                                  |                                        |
|--------------------------------------------------------------------------------------------------------------------------------------------------------------------------------------------------------------------------------------------------------------------------------|-----------------------------------------|----------------------------------------------------------------------------------|----------------------------------------|
| EPI_ISL_937147, EPI_ISL_937148,<br>EPI_ISL_937149, EPI_ISL_937150,<br>EPI_ISL_937151                                                                                                                                                                                           |                                         |                                                                                  |                                        |
| EPI_ISL_937152, EPI_ISL_937153,<br>EPI_ISL_937154, EPI_ISL_937155,<br>EPI_ISL_937156                                                                                                                                                                                           | DOHMH PHL                               | New York City Public Health Laboratory                                           | Jade Wang, et al.                      |
| EPI_ISL_937157, EPI_ISL_937158,<br>EPI_ISL_937159, EPI_ISL_937160,<br>EPI_ISL_937161, EPI_ISL_937162,<br>EPI_ISL_937163                                                                                                                                                        | DOHMH Jamaica                           | New York City Public Health Laboratory                                           | Jade Wang, et al.                      |
| EPI_ISL_937164, EPI_ISL_937165<br>EPI_ISL_937166                                                                                                                                                                                                                               | DOHMH Corona<br>DOHMH Riverside         | New York City Public Health Laboratory<br>New York City Public Health Laboratory | Jade Wang, et al.<br>Jade Wang, et al. |
| EPI_ISL_937167                                                                                                                                                                                                                                                                 | DOHMH Central Harlem                    | New York City Public Health Laboratory                                           | Jade Wang, et al.                      |
| EPI_ISL_937168                                                                                                                                                                                                                                                                 | DOHMH Crown Heights                     | New York City Public Health Laboratory                                           | Jade Wang, et al.                      |
| EPI_ISL_937169, EPI_ISL_937170,<br>EPI_ISL_937171                                                                                                                                                                                                                              | DOHMH PHL                               | New York City Public Health Laboratory                                           | Jade Wang, et al.                      |
| EPI_ISL_937172                                                                                                                                                                                                                                                                 | DOHMH Central Harlem                    | New York City Public Health Laboratory                                           | Jade Wang, et al.                      |
| EPI_ISL_937173                                                                                                                                                                                                                                                                 | DOHMH Crown Heights                     | New York City Public Health Laboratory                                           | Jade Wang, et al.                      |
| EPI_ISL_937174                                                                                                                                                                                                                                                                 | DOHMH Chelsea                           | New York City Public Health Laboratory                                           | Jade Wang, et al.                      |
| EPI_ISL_937175, EPI_ISL_937176,<br>EPI_ISL_937177                                                                                                                                                                                                                              | DOHMH Jamaica                           | New York City Public Health Laboratory                                           | Jade Wang, et al.                      |
| EPI_ISL_937178, EPI_ISL_937179,<br>EPI_ISL_937180, EPI_ISL_937181,<br>EPI_ISL_937182, EPI_ISL_937183,<br>EPI_ISL_937184                                                                                                                                                        | DOHMH Corona                            | New York City Public Health Laboratory                                           | Jade Wang, et al.                      |
| EPI_ISL_937185                                                                                                                                                                                                                                                                 | DOHMH PHL                               | New York City Public Health Laboratory                                           | Jade Wang, et al.                      |
| EPI_ISL_937186, EPI_ISL_937187,<br>EPI_ISL_937188, EPI_ISL_937189,<br>EPI_ISL_937190                                                                                                                                                                                           | OCME Office Of Chief Medical Examiner   | New York City Public Health Laboratory                                           | Jade Wang, et al.                      |
| EPI_ISL_937191, EPI_ISL_937192                                                                                                                                                                                                                                                 | Department of Homeless Services         | New York City Public Health Laboratory                                           | Jade Wang, et al.                      |
| EPI_ISL_937193, EPI_ISL_937194,<br>EPI_ISL_937195, EPI_ISL_937196,<br>EPI_ISL_937197, EPI_ISL_937198,<br>EPI_ISL_937199                                                                                                                                                        | OCME Office Of Chief Medical Examiner   | New York City Public Health Laboratory                                           | Jade Wang, et al.                      |
| EPI_ISL_937200, EPI_ISL_937201                                                                                                                                                                                                                                                 | DOHMH Fort Greene                       | New York City Public Health Laboratory                                           | Jade Wang, et al.                      |
| EPI_ISL_937202, EPI_ISL_937203                                                                                                                                                                                                                                                 | DOHMH Chelsea                           | New York City Public Health Laboratory                                           | Jade Wang, et al.                      |
| EPI_ISL_937204, EPI_ISL_937205                                                                                                                                                                                                                                                 | DOHMH Central Harlem                    | New York City Public Health Laboratory                                           | Jade Wang, et al.                      |
| EPI_ISL_937206, EPI_ISL_937207                                                                                                                                                                                                                                                 | DOHMH Morrisania                        | New York City Public Health Laboratory                                           | Jade Wang, et al.                      |
| EPI_ISL_937208                                                                                                                                                                                                                                                                 | DOHMH Corona                            | New York City Public Health Laboratory                                           | Jade Wang, et al.                      |
| EPI_ISL_937209, EPI_ISL_937210,<br>EPI_ISL_937211, EPI_ISL_937212                                                                                                                                                                                                              | DOHMH PHL                               | New York City Public Health Laboratory                                           | Jade Wang, et al.                      |
| EPI_ISL_937213                                                                                                                                                                                                                                                                 | DOHMH Jamaica                           | New York City Public Health Laboratory                                           | Jade Wang, et al.                      |
| EPI_ISL_937214                                                                                                                                                                                                                                                                 | DOHMH Corona                            | New York City Public Health Laboratory                                           | Jade Wang, et al.                      |
| EPI_ISL_937215                                                                                                                                                                                                                                                                 | DOHMH PHL                               | New York City Public Health Laboratory                                           | Jade Wang, et al.                      |
| EPI_ISL_937216                                                                                                                                                                                                                                                                 | DOHMH Central Harlem                    | New York City Public Health Laboratory                                           | Jade Wang, et al.                      |
| EPI_ISL_937217, EPI_ISL_937218                                                                                                                                                                                                                                                 | DOHMH Chelsea                           | New York City Public Health Laboratory                                           | Jade Wang, et al.                      |
| EPI_ISL_937219, EPI_ISL_937220,<br>EPI_ISL_937221, EPI_ISL_937222,<br>EPI_ISL_937223, EPI_ISL_937224,<br>EPI_ISL_937225, EPI_ISL_937226                                                                                                                                        | DOHMH Jamaica                           | New York City Public Health Laboratory                                           | Jade Wang, et al.                      |
| EPI_ISL_937227, EPI_ISL_937228,<br>EPI_ISL_937229, EPI_ISL_937230,<br>EPI_ISL_937231                                                                                                                                                                                           | DOHMH Corona                            | New York City Public Health Laboratory                                           | Jade Wang, et al.                      |
| EPI_ISL_937232, EPI_ISL_937233,<br>EPI_ISL_937234, EPI_ISL_937235,<br>EPI_ISL_937236                                                                                                                                                                                           | DOHMH Morrisania                        | New York City Public Health Laboratory                                           | Jade Wang, et al.                      |
| EPI_ISL_937237                                                                                                                                                                                                                                                                 | DOHMH Riverside                         | New York City Public Health Laboratory                                           | Jade Wang, et al.                      |
| EPI_ISL_937238, EPI_ISL_937239                                                                                                                                                                                                                                                 | DOHMH Morrisania                        | New York City Public Health Laboratory                                           | Jade Wang, et al.                      |
| EPI_ISL_937240, EPI_ISL_937241,<br>EPI_ISL_937242, EPI_ISL_937243,<br>EPI_ISL_937244, EPI_ISL_937245,<br>EPI_ISL_937246, EPI_ISL_937247                                                                                                                                        | OCME Office Of Chief Medical Examiner   | New York City Public Health Laboratory                                           | Jade Wang, et al.                      |
| EPI_ISL_937248, EPI_ISL_937249,<br>EPI_ISL_937250                                                                                                                                                                                                                              | Department of Homeless Services         | New York City Public Health Laboratory                                           | Jade Wang, et al.                      |
| EPI_ISL_937251, EPI_ISL_937252,<br>EPI_ISL_937253, EPI_ISL_937254,<br>EPI_ISL_937255                                                                                                                                                                                           | OCME Office Of Chief Medical Examiner   | New York City Public Health Laboratory                                           | Jade Wang, et al.                      |
| EPI_ISL_937256, EPI_ISL_937257, EPI_ISL_937258, EPI_ISL_937259, EPI_ISL_937260, EPI_ISL_937261, EPI_ISL_937262, EPI_ISL_937263, EPI_ISL_937264, EPI_ISL_937265, EPI_ISL_937266, EPI_ISL_937267, EPI_ISL_937268, EPI_ISL_937269, EPI_ISL_937270, EPI_ISL_937271, EPI_ISL_937272 | NYC HH Elmhurst Hospital Medical Center | New York City Public Health Laboratory                                           | Jade Wang, et al.                      |

see above

|                                                                                                                                                                                                                                                                                                                                                                                                                                                                                                                                                                                                                                                                                                                                                                                                                                                |                                       |                                                                                                                        |                                                                                                                                                                                                                                          |
|------------------------------------------------------------------------------------------------------------------------------------------------------------------------------------------------------------------------------------------------------------------------------------------------------------------------------------------------------------------------------------------------------------------------------------------------------------------------------------------------------------------------------------------------------------------------------------------------------------------------------------------------------------------------------------------------------------------------------------------------------------------------------------------------------------------------------------------------|---------------------------------------|------------------------------------------------------------------------------------------------------------------------|------------------------------------------------------------------------------------------------------------------------------------------------------------------------------------------------------------------------------------------|
| EPI_ISL_955265                                                                                                                                                                                                                                                                                                                                                                                                                                                                                                                                                                                                                                                                                                                                                                                                                                 | Sunrise Medical Laboratory            | Pathogen Discovery, Respiratory Viruses Branch, Division of Viral Diseases, Centers for Disease Control and Prevention | Ying Tao, Jing Zhang, Yan Li, Krista Queen, Anna Uehara, Peter Cook, Clinton R. Paden, Haibin Wang, Suxiang Tong                                                                                                                         |
| EPI_ISL_955271                                                                                                                                                                                                                                                                                                                                                                                                                                                                                                                                                                                                                                                                                                                                                                                                                                 | American Esoteric Laboratory          | Pathogen Discovery, Respiratory Viruses Branch, Division of Viral Diseases, Centers for Disease Control and Prevention | Ying Tao, Jing Zhang, Yan Li, Krista Queen, Anna Uehara, Peter Cook, Clinton R. Paden, Haibin Wang, Suxiang Tong                                                                                                                         |
| EPI_ISL_955300                                                                                                                                                                                                                                                                                                                                                                                                                                                                                                                                                                                                                                                                                                                                                                                                                                 | Sunrise Medical Laboratory            | Pathogen Discovery, Respiratory Viruses Branch, Division of Viral Diseases, Centers for Disease Control and Prevention | Ying Tao, Jing Zhang, Yan Li, Krista Queen, Anna Uehara, Peter Cook, Clinton R. Paden, Haibin Wang, Suxiang Tong                                                                                                                         |
| EPI_ISL_961289, EPI_ISL_961290, EPI_ISL_961291, EPI_ISL_961292, EPI_ISL_961293, EPI_ISL_961294, EPI_ISL_961295, EPI_ISL_961296, EPI_ISL_961297, EPI_ISL_961298, EPI_ISL_961299, EPI_ISL_961300, EPI_ISL_961301, EPI_ISL_961302, EPI_ISL_961303, EPI_ISL_961304, EPI_ISL_961305, EPI_ISL_961306, EPI_ISL_961307, EPI_ISL_961308, EPI_ISL_961309, EPI_ISL_961310, EPI_ISL_961311, EPI_ISL_961312, EPI_ISL_961313, EPI_ISL_961314, EPI_ISL_961315, EPI_ISL_961328, EPI_ISL_961329, EPI_ISL_961330, EPI_ISL_961331, EPI_ISL_961332, EPI_ISL_961333, EPI_ISL_961334, EPI_ISL_961335, EPI_ISL_961336, EPI_ISL_961337, EPI_ISL_961338, EPI_ISL_961339, EPI_ISL_961340, EPI_ISL_961341, EPI_ISL_961342, EPI_ISL_961343, EPI_ISL_961344, EPI_ISL_961345, EPI_ISL_961346, EPI_ISL_961347, EPI_ISL_961348, EPI_ISL_961349, EPI_ISL_961350, EPI_ISL_961351 |                                       |                                                                                                                        |                                                                                                                                                                                                                                          |
| see above                                                                                                                                                                                                                                                                                                                                                                                                                                                                                                                                                                                                                                                                                                                                                                                                                                      | Biotia                                | Biotia                                                                                                                 | Dorottya Nagy-Szakal, Mara Couto-Rodriguez, Heather Wells, Joseph Barrows, Marilyne Debieu, Kristin Butcher, Siyuan Chen, Agnes Berki, Courteny Hager, Robert Boorstein, Mariah Taylor, Colleen Jonsson, Christopher Mason, Niamh O'Hara |
| EPI_ISL_965303, EPI_ISL_965528, EPI_ISL_965770, EPI_ISL_965812, EPI_ISL_965814, EPI_ISL_965826, EPI_ISL_965837, EPI_ISL_965838, EPI_ISL_965839, EPI_ISL_965910, EPI_ISL_965948, EPI_ISL_965962, EPI_ISL_965963, EPI_ISL_965964, EPI_ISL_965965, EPI_ISL_965967, EPI_ISL_965968, EPI_ISL_965969, EPI_ISL_965970, EPI_ISL_965971, EPI_ISL_965972, EPI_ISL_965973, EPI_ISL_965977, EPI_ISL_965980, EPI_ISL_965989, EPI_ISL_966020, EPI_ISL_966044, EPI_ISL_966062, EPI_ISL_966084, EPI_ISL_966108, EPI_ISL_966160, EPI_ISL_966184, EPI_ISL_966204, EPI_ISL_966227, EPI_ISL_966245, EPI_ISL_966264, EPI_ISL_966289, EPI_ISL_966308, EPI_ISL_966311, EPI_ISL_966333, EPI_ISL_966357, EPI_ISL_966375, EPI_ISL_966376, EPI_ISL_966377, EPI_ISL_966378                                                                                                 |                                       |                                                                                                                        |                                                                                                                                                                                                                                          |
| see above                                                                                                                                                                                                                                                                                                                                                                                                                                                                                                                                                                                                                                                                                                                                                                                                                                      | NYU Langone Health                    | Departments of Pathology and Medicine, New York University School of Medicine                                          | Adriana Heguy, Dacia Dimartino, Emily Guzman, Christian Marier, Peter Meyn, Sitharam Ramaswami, Gael Westby, Paul Zappile, Yutong Zhang, Paolo Cotzia, Guiqing Wang                                                                      |
| EPI_ISL_966379                                                                                                                                                                                                                                                                                                                                                                                                                                                                                                                                                                                                                                                                                                                                                                                                                                 | OCME Office Of Chief Medical Examiner | New York City Public Health Laboratory                                                                                 | Jade Wang, et al.                                                                                                                                                                                                                        |
| EPI_ISL_966380                                                                                                                                                                                                                                                                                                                                                                                                                                                                                                                                                                                                                                                                                                                                                                                                                                 | NYU Langone Health                    | Departments of Pathology and Medicine, New York University School of Medicine                                          | Adriana Heguy, Dacia Dimartino, Emily Guzman, Christian Marier, Peter Meyn, Sitharam Ramaswami, Gael Westby, Paul Zappile, Yutong Zhang, Paolo Cotzia, Guiqing Wang                                                                      |
| EPI_ISL_966381                                                                                                                                                                                                                                                                                                                                                                                                                                                                                                                                                                                                                                                                                                                                                                                                                                 | OCME Office Of Chief Medical Examiner | New York City Public Health Laboratory                                                                                 | Jade Wang, et al.                                                                                                                                                                                                                        |
| EPI_ISL_966382                                                                                                                                                                                                                                                                                                                                                                                                                                                                                                                                                                                                                                                                                                                                                                                                                                 | DOHMH Jamaica                         | New York City Public Health Laboratory                                                                                 | Jade Wang, et al.                                                                                                                                                                                                                        |
| EPI_ISL_966383                                                                                                                                                                                                                                                                                                                                                                                                                                                                                                                                                                                                                                                                                                                                                                                                                                 | OCME Office Of Chief Medical Examiner | New York City Public Health Laboratory                                                                                 | Jade Wang, et al.                                                                                                                                                                                                                        |
| EPI_ISL_966384                                                                                                                                                                                                                                                                                                                                                                                                                                                                                                                                                                                                                                                                                                                                                                                                                                 | DOHMH Jamaica                         | New York City Public Health Laboratory                                                                                 | Jade Wang, et al.                                                                                                                                                                                                                        |
| EPI_ISL_966385                                                                                                                                                                                                                                                                                                                                                                                                                                                                                                                                                                                                                                                                                                                                                                                                                                 | Department of Homeless Services       | New York City Public Health Laboratory                                                                                 | Jade Wang, et al.                                                                                                                                                                                                                        |
| EPI_ISL_966386                                                                                                                                                                                                                                                                                                                                                                                                                                                                                                                                                                                                                                                                                                                                                                                                                                 | DOHMH Corona                          | New York City Public Health Laboratory                                                                                 | Jade Wang, et al.                                                                                                                                                                                                                        |
| EPI_ISL_966387, EPI_ISL_966388                                                                                                                                                                                                                                                                                                                                                                                                                                                                                                                                                                                                                                                                                                                                                                                                                 | DOHMH Jamaica                         | New York City Public Health Laboratory                                                                                 | Jade Wang, et al.                                                                                                                                                                                                                        |
| EPI_ISL_966389                                                                                                                                                                                                                                                                                                                                                                                                                                                                                                                                                                                                                                                                                                                                                                                                                                 | DOHMH Central Harlem                  | New York City Public Health Laboratory                                                                                 | Jade Wang, et al.                                                                                                                                                                                                                        |
| EPI_ISL_966390, EPI_ISL_966391                                                                                                                                                                                                                                                                                                                                                                                                                                                                                                                                                                                                                                                                                                                                                                                                                 | OCME Office Of Chief Medical Examiner | New York City Public Health Laboratory                                                                                 | Jade Wang, et al.                                                                                                                                                                                                                        |
| EPI_ISL_966392                                                                                                                                                                                                                                                                                                                                                                                                                                                                                                                                                                                                                                                                                                                                                                                                                                 | DOHMH Corona                          | New York City Public Health Laboratory                                                                                 | Jade Wang, et al.                                                                                                                                                                                                                        |
| EPI_ISL_966393                                                                                                                                                                                                                                                                                                                                                                                                                                                                                                                                                                                                                                                                                                                                                                                                                                 | OCME Office Of Chief Medical Examiner | New York City Public Health Laboratory                                                                                 | Jade Wang, et al.                                                                                                                                                                                                                        |
| EPI_ISL_966394                                                                                                                                                                                                                                                                                                                                                                                                                                                                                                                                                                                                                                                                                                                                                                                                                                 | DOHMH Corona                          | New York City Public Health Laboratory                                                                                 | Jade Wang, et al.                                                                                                                                                                                                                        |
| EPI_ISL_966395                                                                                                                                                                                                                                                                                                                                                                                                                                                                                                                                                                                                                                                                                                                                                                                                                                 | DOHMH Jamaica                         | New York City Public Health Laboratory                                                                                 | Jade Wang, et al.                                                                                                                                                                                                                        |
| EPI_ISL_966396, EPI_ISL_966397                                                                                                                                                                                                                                                                                                                                                                                                                                                                                                                                                                                                                                                                                                                                                                                                                 | OCME Office Of Chief Medical Examiner | New York City Public Health Laboratory                                                                                 | Jade Wang, et al.                                                                                                                                                                                                                        |
| EPI_ISL_966398                                                                                                                                                                                                                                                                                                                                                                                                                                                                                                                                                                                                                                                                                                                                                                                                                                 | DOHMH Jamaica                         | New York City Public Health Laboratory                                                                                 | Jade Wang, et al.                                                                                                                                                                                                                        |
| EPI_ISL_966399                                                                                                                                                                                                                                                                                                                                                                                                                                                                                                                                                                                                                                                                                                                                                                                                                                 | DOHMH Corona                          | New York City Public Health Laboratory                                                                                 | Jade Wang, et al.                                                                                                                                                                                                                        |
| EPI_ISL_966400                                                                                                                                                                                                                                                                                                                                                                                                                                                                                                                                                                                                                                                                                                                                                                                                                                 | OCME Office Of Chief Medical Examiner | New York City Public Health Laboratory                                                                                 | Jade Wang, et al.                                                                                                                                                                                                                        |
| EPI_ISL_966401                                                                                                                                                                                                                                                                                                                                                                                                                                                                                                                                                                                                                                                                                                                                                                                                                                 | Department of Homeless Services       | New York City Public Health Laboratory                                                                                 | Jade Wang, et al.                                                                                                                                                                                                                        |
| EPI_ISL_966402, EPI_ISL_966403                                                                                                                                                                                                                                                                                                                                                                                                                                                                                                                                                                                                                                                                                                                                                                                                                 | OCME Office Of Chief Medical Examiner | New York City Public Health Laboratory                                                                                 | Jade Wang, et al.                                                                                                                                                                                                                        |
| EPI_ISL_966404                                                                                                                                                                                                                                                                                                                                                                                                                                                                                                                                                                                                                                                                                                                                                                                                                                 | DOHMH PHL                             | New York City Public Health Laboratory                                                                                 | Jade Wang, et al.                                                                                                                                                                                                                        |
| EPI_ISL_966405                                                                                                                                                                                                                                                                                                                                                                                                                                                                                                                                                                                                                                                                                                                                                                                                                                 | DOHMH Jamaica                         | New York City Public Health Laboratory                                                                                 | Jade Wang, et al.                                                                                                                                                                                                                        |
| EPI_ISL_966406                                                                                                                                                                                                                                                                                                                                                                                                                                                                                                                                                                                                                                                                                                                                                                                                                                 | NYU Langone Health                    | Departments of Pathology and Medicine, New York University School of Medicine                                          | Adriana Heguy, Dacia Dimartino, Emily Guzman, Christian Marier, Peter Meyn, Sitharam Ramaswami, Gael Westby, Paul Zappile, Yutong Zhang, Paolo Cotzia, Guiqing Wang                                                                      |
| EPI_ISL_966407, EPI_ISL_966408                                                                                                                                                                                                                                                                                                                                                                                                                                                                                                                                                                                                                                                                                                                                                                                                                 | DOHMH Morrisania                      | New York City Public Health Laboratory                                                                                 | Jade Wang, et al.                                                                                                                                                                                                                        |
| EPI_ISL_966409, EPI_ISL_966410                                                                                                                                                                                                                                                                                                                                                                                                                                                                                                                                                                                                                                                                                                                                                                                                                 | DOHMH Corona                          | New York City Public Health Laboratory                                                                                 | Jade Wang, et al.                                                                                                                                                                                                                        |
| EPI_ISL_966411                                                                                                                                                                                                                                                                                                                                                                                                                                                                                                                                                                                                                                                                                                                                                                                                                                 | OCME Office Of Chief Medical Examiner | New York City Public Health Laboratory                                                                                 | Jade Wang, et al.                                                                                                                                                                                                                        |
| EPI_ISL_966412                                                                                                                                                                                                                                                                                                                                                                                                                                                                                                                                                                                                                                                                                                                                                                                                                                 | DOHMH Jamaica                         | New York City Public Health Laboratory                                                                                 | Jade Wang, et al.                                                                                                                                                                                                                        |
| EPI_ISL_966413                                                                                                                                                                                                                                                                                                                                                                                                                                                                                                                                                                                                                                                                                                                                                                                                                                 | DOHMH Central Harlem                  | New York City Public Health Laboratory                                                                                 | Jade Wang, et al.                                                                                                                                                                                                                        |
| EPI_ISL_966414                                                                                                                                                                                                                                                                                                                                                                                                                                                                                                                                                                                                                                                                                                                                                                                                                                 | DOHMH Morrisania                      | New York City Public Health Laboratory                                                                                 | Jade Wang, et al.                                                                                                                                                                                                                        |
| EPI_ISL_966415                                                                                                                                                                                                                                                                                                                                                                                                                                                                                                                                                                                                                                                                                                                                                                                                                                 | DOHMH Corona                          | New York City Public Health Laboratory                                                                                 | Jade Wang, et al.                                                                                                                                                                                                                        |
| EPI_ISL_966416                                                                                                                                                                                                                                                                                                                                                                                                                                                                                                                                                                                                                                                                                                                                                                                                                                 | DOHMH Central Harlem                  | New York City Public Health Laboratory                                                                                 | Jade Wang, et al.                                                                                                                                                                                                                        |
| EPI_ISL_966417, EPI_ISL_966418, EPI_ISL_966419                                                                                                                                                                                                                                                                                                                                                                                                                                                                                                                                                                                                                                                                                                                                                                                                 | OCME Office Of Chief Medical Examiner | New York City Public Health Laboratory                                                                                 | Jade Wang, et al.                                                                                                                                                                                                                        |
| EPI_ISL_966420                                                                                                                                                                                                                                                                                                                                                                                                                                                                                                                                                                                                                                                                                                                                                                                                                                 | DOHMH Morrisania                      | New York City Public Health Laboratory                                                                                 | Jade Wang, et al.                                                                                                                                                                                                                        |
| EPI_ISL_966421, EPI_ISL_966422                                                                                                                                                                                                                                                                                                                                                                                                                                                                                                                                                                                                                                                                                                                                                                                                                 | DOHMH Jamaica                         | New York City Public Health Laboratory                                                                                 | Jade Wang, et al.                                                                                                                                                                                                                        |
| EPI_ISL_966423                                                                                                                                                                                                                                                                                                                                                                                                                                                                                                                                                                                                                                                                                                                                                                                                                                 | DOHMH Morrisania                      | New York City Public Health Laboratory                                                                                 | Jade Wang, et al.                                                                                                                                                                                                                        |
| EPI_ISL_966424                                                                                                                                                                                                                                                                                                                                                                                                                                                                                                                                                                                                                                                                                                                                                                                                                                 | DOHMH Jamaica                         | New York City Public Health Laboratory                                                                                 | Jade Wang, et al.                                                                                                                                                                                                                        |
| EPI_ISL_966425                                                                                                                                                                                                                                                                                                                                                                                                                                                                                                                                                                                                                                                                                                                                                                                                                                 | DOHMH Corona                          | New York City Public Health Laboratory                                                                                 | Jade Wang, et al.                                                                                                                                                                                                                        |
| EPI_ISL_966426                                                                                                                                                                                                                                                                                                                                                                                                                                                                                                                                                                                                                                                                                                                                                                                                                                 | DOHMH PHL                             | New York City Public Health Laboratory                                                                                 | Jade Wang, et al.                                                                                                                                                                                                                        |
| EPI_ISL_966427                                                                                                                                                                                                                                                                                                                                                                                                                                                                                                                                                                                                                                                                                                                                                                                                                                 | OCME Office Of Chief Medical Examiner | New York City Public Health Laboratory                                                                                 | Jade Wang, et al.                                                                                                                                                                                                                        |
| EPI_ISL_966428                                                                                                                                                                                                                                                                                                                                                                                                                                                                                                                                                                                                                                                                                                                                                                                                                                 | NYU Langone Health                    | Departments of Pathology and Medicine, New York University School of Medicine                                          | Adriana Heguy, Dacia Dimartino, Emily Guzman, Christian Marier, Peter Meyn, Sitharam Ramaswami, Gael Westby, Paul Zappile, Yutong Zhang, Paolo Cotzia, Guiqing Wang                                                                      |
| EPI_ISL_966429, EPI_ISL_966430, EPI_ISL_966431                                                                                                                                                                                                                                                                                                                                                                                                                                                                                                                                                                                                                                                                                                                                                                                                 | OCME Office Of Chief Medical Examiner | New York City Public Health Laboratory                                                                                 | Jade Wang, et al.                                                                                                                                                                                                                        |

|                                                                                                                                                                |                                       |                                                                                                    |                                                                                                                                                                                                                                                                                                                                                                                                                                                                                                                                                              |
|----------------------------------------------------------------------------------------------------------------------------------------------------------------|---------------------------------------|----------------------------------------------------------------------------------------------------|--------------------------------------------------------------------------------------------------------------------------------------------------------------------------------------------------------------------------------------------------------------------------------------------------------------------------------------------------------------------------------------------------------------------------------------------------------------------------------------------------------------------------------------------------------------|
| EPI_ISL_966432, EPI_ISL_966433                                                                                                                                 | DOHMH Jamaica                         | New York City Public Health Laboratory                                                             | Jade Wang, et al.                                                                                                                                                                                                                                                                                                                                                                                                                                                                                                                                            |
| EPI_ISL_966434, EPI_ISL_966435, EPI_ISL_966436, EPI_ISL_966437                                                                                                 | DOHMH Morrisania                      | New York City Public Health Laboratory                                                             | Jade Wang, et al.                                                                                                                                                                                                                                                                                                                                                                                                                                                                                                                                            |
| EPI_ISL_966438, EPI_ISL_966439, EPI_ISL_966440, EPI_ISL_966441, EPI_ISL_966442                                                                                 | OCME Office Of Chief Medical Examiner | New York City Public Health Laboratory                                                             | Jade Wang, et al.                                                                                                                                                                                                                                                                                                                                                                                                                                                                                                                                            |
| EPI_ISL_966443                                                                                                                                                 | DOHMH Fort Greene                     | New York City Public Health Laboratory                                                             | Jade Wang, et al.                                                                                                                                                                                                                                                                                                                                                                                                                                                                                                                                            |
| EPI_ISL_966444                                                                                                                                                 | DOHMH PHL                             | New York City Public Health Laboratory                                                             | Jade Wang, et al.                                                                                                                                                                                                                                                                                                                                                                                                                                                                                                                                            |
| EPI_ISL_966445, EPI_ISL_966446                                                                                                                                 | DOHMH Corona                          | New York City Public Health Laboratory                                                             | Jade Wang, et al.                                                                                                                                                                                                                                                                                                                                                                                                                                                                                                                                            |
| EPI_ISL_966447, EPI_ISL_966448, EPI_ISL_966449                                                                                                                 | DOHMH Jamaica                         | New York City Public Health Laboratory                                                             | Jade Wang, et al.                                                                                                                                                                                                                                                                                                                                                                                                                                                                                                                                            |
| EPI_ISL_966450                                                                                                                                                 | DOHMH Central Harlem                  | New York City Public Health Laboratory                                                             | Jade Wang, et al.                                                                                                                                                                                                                                                                                                                                                                                                                                                                                                                                            |
| EPI_ISL_966451                                                                                                                                                 | DOHMH Morrisania                      | New York City Public Health Laboratory                                                             | Jade Wang, et al.                                                                                                                                                                                                                                                                                                                                                                                                                                                                                                                                            |
| EPI_ISL_966452                                                                                                                                                 | NYU Langone Health                    | Departments of Pathology and Medicine, New York University School of Medicine                      | Adriana Heguy, Dacia Dimartino, Emily Guzman, Christian Marier, Peter Meyn, Sitharam Ramaswami, Gael Westby, Paul Zappile, Yutong Zhang, Paolo Cotzia, Guiqing Wang                                                                                                                                                                                                                                                                                                                                                                                          |
| EPI_ISL_966453, EPI_ISL_966454, EPI_ISL_966455, EPI_ISL_966456, EPI_ISL_966457, EPI_ISL_966458                                                                 | OCME Office Of Chief Medical Examiner | New York City Public Health Laboratory                                                             | Jade Wang, et al.                                                                                                                                                                                                                                                                                                                                                                                                                                                                                                                                            |
| EPI_ISL_966459                                                                                                                                                 | DOHMH Corona                          | New York City Public Health Laboratory                                                             | Jade Wang, et al.                                                                                                                                                                                                                                                                                                                                                                                                                                                                                                                                            |
| EPI_ISL_966460                                                                                                                                                 | DOHMH Morrisania                      | New York City Public Health Laboratory                                                             | Jade Wang, et al.                                                                                                                                                                                                                                                                                                                                                                                                                                                                                                                                            |
| EPI_ISL_966461, EPI_ISL_966462, EPI_ISL_966463                                                                                                                 | DOHMH Jamaica                         | New York City Public Health Laboratory                                                             | Jade Wang, et al.                                                                                                                                                                                                                                                                                                                                                                                                                                                                                                                                            |
| EPI_ISL_966464, EPI_ISL_966465, EPI_ISL_966466                                                                                                                 | DOHMH PHL                             | New York City Public Health Laboratory                                                             | Jade Wang, et al.                                                                                                                                                                                                                                                                                                                                                                                                                                                                                                                                            |
| EPI_ISL_966467                                                                                                                                                 | DOHMH Corona                          | New York City Public Health Laboratory                                                             | Jade Wang, et al.                                                                                                                                                                                                                                                                                                                                                                                                                                                                                                                                            |
| EPI_ISL_966468                                                                                                                                                 | DOHMH Chelsea                         | New York City Public Health Laboratory                                                             | Jade Wang, et al.                                                                                                                                                                                                                                                                                                                                                                                                                                                                                                                                            |
| EPI_ISL_966469                                                                                                                                                 | Department of Homeless Services       | New York City Public Health Laboratory                                                             | Jade Wang, et al.                                                                                                                                                                                                                                                                                                                                                                                                                                                                                                                                            |
| EPI_ISL_966470, EPI_ISL_966471                                                                                                                                 | OCME Office Of Chief Medical Examiner | New York City Public Health Laboratory                                                             | Jade Wang, et al.                                                                                                                                                                                                                                                                                                                                                                                                                                                                                                                                            |
| EPI_ISL_966472                                                                                                                                                 | NYU Langone Health                    | Departments of Pathology and Medicine, New York University School of Medicine                      | Adriana Heguy, Dacia Dimartino, Emily Guzman, Christian Marier, Peter Meyn, Sitharam Ramaswami, Gael Westby, Paul Zappile, Yutong Zhang, Paolo Cotzia, Guiqing Wang                                                                                                                                                                                                                                                                                                                                                                                          |
| EPI_ISL_966473                                                                                                                                                 | OCME Office Of Chief Medical Examiner | New York City Public Health Laboratory                                                             | Jade Wang, et al.                                                                                                                                                                                                                                                                                                                                                                                                                                                                                                                                            |
| EPI_ISL_966474                                                                                                                                                 | DOHMH Corona                          | New York City Public Health Laboratory                                                             | Jade Wang, et al.                                                                                                                                                                                                                                                                                                                                                                                                                                                                                                                                            |
| EPI_ISL_966475                                                                                                                                                 | DOHMH Central Harlem                  | New York City Public Health Laboratory                                                             | Jade Wang, et al.                                                                                                                                                                                                                                                                                                                                                                                                                                                                                                                                            |
| EPI_ISL_966476, EPI_ISL_966477, EPI_ISL_966478                                                                                                                 | DOHMH Corona                          | New York City Public Health Laboratory                                                             | Jade Wang, et al.                                                                                                                                                                                                                                                                                                                                                                                                                                                                                                                                            |
| EPI_ISL_966479                                                                                                                                                 | DOHMH Jamaica                         | New York City Public Health Laboratory                                                             | Jade Wang, et al.                                                                                                                                                                                                                                                                                                                                                                                                                                                                                                                                            |
| EPI_ISL_966480                                                                                                                                                 | DOHMH Corona                          | New York City Public Health Laboratory                                                             | Jade Wang, et al.                                                                                                                                                                                                                                                                                                                                                                                                                                                                                                                                            |
| EPI_ISL_966481                                                                                                                                                 | DOHMH Jamaica                         | New York City Public Health Laboratory                                                             | Jade Wang, et al.                                                                                                                                                                                                                                                                                                                                                                                                                                                                                                                                            |
| EPI_ISL_966482                                                                                                                                                 | DOHMH Corona                          | New York City Public Health Laboratory                                                             | Jade Wang, et al.                                                                                                                                                                                                                                                                                                                                                                                                                                                                                                                                            |
| EPI_ISL_966483                                                                                                                                                 | DOHMH Chelsea                         | New York City Public Health Laboratory                                                             | Jade Wang, et al.                                                                                                                                                                                                                                                                                                                                                                                                                                                                                                                                            |
| EPI_ISL_966484                                                                                                                                                 | DOHMH Crown Heights                   | New York City Public Health Laboratory                                                             | Jade Wang, et al.                                                                                                                                                                                                                                                                                                                                                                                                                                                                                                                                            |
| EPI_ISL_966485, EPI_ISL_966486, EPI_ISL_966487, EPI_ISL_966488                                                                                                 | OCME Office Of Chief Medical Examiner | New York City Public Health Laboratory                                                             | Jade Wang, et al.                                                                                                                                                                                                                                                                                                                                                                                                                                                                                                                                            |
| EPI_ISL_966489                                                                                                                                                 | NYU Langone Health                    | Departments of Pathology and Medicine, New York University School of Medicine                      | Adriana Heguy, Dacia Dimartino, Emily Guzman, Christian Marier, Peter Meyn, Sitharam Ramaswami, Gael Westby, Paul Zappile, Yutong Zhang, Paolo Cotzia, Guiqing Wang                                                                                                                                                                                                                                                                                                                                                                                          |
| EPI_ISL_966490                                                                                                                                                 | OCME Office Of Chief Medical Examiner | New York City Public Health Laboratory                                                             | Jade Wang, et al.                                                                                                                                                                                                                                                                                                                                                                                                                                                                                                                                            |
| EPI_ISL_966491                                                                                                                                                 | DOHMH Corona                          | New York City Public Health Laboratory                                                             | Jade Wang, et al.                                                                                                                                                                                                                                                                                                                                                                                                                                                                                                                                            |
| EPI_ISL_966492, EPI_ISL_966493, EPI_ISL_966494, EPI_ISL_966495                                                                                                 | OCME Office Of Chief Medical Examiner | New York City Public Health Laboratory                                                             | Jade Wang, et al.                                                                                                                                                                                                                                                                                                                                                                                                                                                                                                                                            |
| EPI_ISL_966496                                                                                                                                                 | NYU Langone Health                    | Departments of Pathology and Medicine, New York University School of Medicine                      | Adriana Heguy, Dacia Dimartino, Emily Guzman, Christian Marier, Peter Meyn, Sitharam Ramaswami, Gael Westby, Paul Zappile, Yutong Zhang, Paolo Cotzia, Guiqing Wang                                                                                                                                                                                                                                                                                                                                                                                          |
| EPI_ISL_966525                                                                                                                                                 | Helix/Illumina                        | Respiratory Viruses Branch, Division of Viral Diseases, Centers for Disease Control and Prevention | Peter W. Cook,Dakota Howard,Dhwani Batra,Ben L. Rambo-Martin,Eileen de Feo,Jan Antico,Christine Tran,Matthew Tolentino,Shannon Wickline,Kim Gietzen,Brad Sickler,Jingtao Liu,Eric Allen,Phil Febbo,Summer Galloway,Nicole L. Washington,Simon White,Geraint Levan,Kelly Schiabor Barrett,Elizabeth Cirulli,Alexandre Bolze,Ary Ascencio,Charlotte Rivera-Garcia,Ryan Cho,Jason Nguyen,Sherry Wang,Jimmy Ramirez,Tyler Cassens,Efren Sandoval,Magnus Isaksson,William Lee,David Becker,Marc Laurent,James Lu,Clinton R. Paden,Suxiang Tong,Duncan MacCannell, |
| EPI_ISL_966549, EPI_ISL_966551, EPI_ISL_966552, EPI_ISL_966565, EPI_ISL_966591, EPI_ISL_966605, EPI_ISL_966623, EPI_ISL_966646, EPI_ISL_966663, EPI_ISL_966682 | NYU Langone Health                    | Departments of Pathology and Medicine, New York University School of Medicine                      | Adriana Heguy, Dacia Dimartino, Emily Guzman, Christian Marier, Peter Meyn, Sitharam Ramaswami, Gael Westby, Paul Zappile, Yutong Zhang, Paolo Cotzia, Guiqing Wang                                                                                                                                                                                                                                                                                                                                                                                          |
| EPI_ISL_966706                                                                                                                                                 | Helix/Illumina                        | Respiratory Viruses Branch, Division of Viral Diseases, Centers for Disease Control and Prevention | Peter W. Cook,Dakota Howard,Dhwani Batra,Ben L. Rambo-Martin,Eileen de Feo,Jan Antico,Christine Tran,Matthew Tolentino,Shannon Wickline,Kim Gietzen,Brad Sickler,Jingtao Liu,Eric Allen,Phil Febbo,Summer Galloway,Nicole L. Washington,Simon White,Geraint Levan,Kelly Schiabor Barrett,Elizabeth Cirulli,Alexandre Bolze,Ary Ascencio,Charlotte Rivera-Garcia,Ryan Cho,Jason Nguyen,Sherry Wang,Jimmy Ramirez,Tyler Cassens,Efren Sandoval,Magnus Isaksson,William Lee,David Becker,Marc Laurent,James Lu,Clinton R. Paden,Suxiang Tong,Duncan MacCannell, |
| EPI_ISL_966707                                                                                                                                                 | NYU Langone Health                    | Departments of Pathology and Medicine, New York University School of Medicine                      | Adriana Heguy, Dacia Dimartino, Emily Guzman, Christian Marier, Peter Meyn, Sitharam Ramaswami, Gael Westby, Paul Zappile, Yutong Zhang, Paolo Cotzia, Guiqing Wang                                                                                                                                                                                                                                                                                                                                                                                          |

EPI\_ISL\_966952, EPI\_ISL\_967055, EPI\_ISL\_967085, EPI\_ISL\_967137, EPI\_ISL\_967207, EPI\_ISL\_967230, EPI\_ISL\_967296, EPI\_ISL\_967332, EPI\_ISL\_967358, EPI\_ISL\_967678, EPI\_ISL\_967789, EPI\_ISL\_967880

|                                                                                                                                                                                                                                                                                                                                                                                                                                                                                                                                                                                                                                                                                                                                                                                                                                                                                                                                                                                                                                                                                                                                                                                                                                |                                        |                                                                                                    |                                                                                                                                                                                                                                                                                                                                                                                                                                                                                                                                                              |
|--------------------------------------------------------------------------------------------------------------------------------------------------------------------------------------------------------------------------------------------------------------------------------------------------------------------------------------------------------------------------------------------------------------------------------------------------------------------------------------------------------------------------------------------------------------------------------------------------------------------------------------------------------------------------------------------------------------------------------------------------------------------------------------------------------------------------------------------------------------------------------------------------------------------------------------------------------------------------------------------------------------------------------------------------------------------------------------------------------------------------------------------------------------------------------------------------------------------------------|----------------------------------------|----------------------------------------------------------------------------------------------------|--------------------------------------------------------------------------------------------------------------------------------------------------------------------------------------------------------------------------------------------------------------------------------------------------------------------------------------------------------------------------------------------------------------------------------------------------------------------------------------------------------------------------------------------------------------|
| see above                                                                                                                                                                                                                                                                                                                                                                                                                                                                                                                                                                                                                                                                                                                                                                                                                                                                                                                                                                                                                                                                                                                                                                                                                      | Helix/Illumina                         | Respiratory Viruses Branch, Division of Viral Diseases, Centers for Disease Control and Prevention | Peter W. Cook,Dakota Howard,Dhwani Batra,Ben L. Rambo-Martin,Eileen de Feo,Jan Antico,Christine Tran,Matthew Tolentino,Shannon Wickline,Kim Gietzen,Brad SICKLER,Jingtao Liu,Eric Allen,Phil Febbo,Summer Galloway,Nicole L. Washington,Simon White,Geraint Levan,Kelly Schiabor Barrett,Elizabeth Cirulli,Alexandre Bolze,Ary Ascencio,Charlotte Rivera-Garcia,Ryan Cho,Jason Nguyen,Sherry Wang,Jimmy Ramirez,Tyler Cassens,Efren Sandoval,Magnus Isaksson,William Lee,David Becker,Marc Laurent,James Lu,Clinton R. Paden,Suxiang Tong,Duncan MacCannell, |
| EPI_ISL_968080                                                                                                                                                                                                                                                                                                                                                                                                                                                                                                                                                                                                                                                                                                                                                                                                                                                                                                                                                                                                                                                                                                                                                                                                                 | Pandemic Response Lab - NYC            | Pandemic Response Lab, R&D                                                                         | Henry Lee, Michael Hammerling, Melissa Hopkins, Cybill del Castillo, William Ward, Pradeep Bugga, Haiping Hao, Jon Laurent                                                                                                                                                                                                                                                                                                                                                                                                                                   |
| EPI_ISL_977666                                                                                                                                                                                                                                                                                                                                                                                                                                                                                                                                                                                                                                                                                                                                                                                                                                                                                                                                                                                                                                                                                                                                                                                                                 | NYU Langone Health                     | Departments of Pathology and Medicine, New York University School of Medicine                      | Adriana Heguy, Dacia Dimartino, Emily Guzman, Christian Marier, Peter Meyn, Sitharam Ramaswami, Gael Westby, Paul Zappile, Yutong Zhang, Paolo Cotzia, Guiqing Wang                                                                                                                                                                                                                                                                                                                                                                                          |
| EPI_ISL_978603, EPI_ISL_978726, EPI_ISL_978736, EPI_ISL_978741                                                                                                                                                                                                                                                                                                                                                                                                                                                                                                                                                                                                                                                                                                                                                                                                                                                                                                                                                                                                                                                                                                                                                                 | Helix/Illumina                         | Respiratory Viruses Branch, Division of Viral Diseases, Centers for Disease Control and Prevention | Peter W. Cook,Dakota Howard,Dhwani Batra,Ben L. Rambo-Martin,Eileen de Feo,Jan Antico,Christine Tran,Matthew Tolentino,Shannon Wickline,Kim Gietzen,Brad SICKLER,Jingtao Liu,Eric Allen,Phil Febbo,Summer Galloway,Nicole L. Washington,Simon White,Geraint Levan,Kelly Schiabor Barrett,Elizabeth Cirulli,Alexandre Bolze,Ary Ascencio,Charlotte Rivera-Garcia,Ryan Cho,Jason Nguyen,Sherry Wang,Jimmy Ramirez,Tyler Cassens,Efren Sandoval,Magnus Isaksson,William Lee,David Becker,Marc Laurent,James Lu,Clinton R. Paden,Suxiang Tong,Duncan MacCannell, |
| EPI_ISL_982425, EPI_ISL_982426, EPI_ISL_982427, EPI_ISL_982428, EPI_ISL_982429, EPI_ISL_982430, EPI_ISL_982431, EPI_ISL_982432, EPI_ISL_982433, EPI_ISL_982434, EPI_ISL_982435, EPI_ISL_982436, EPI_ISL_982437, EPI_ISL_982438, EPI_ISL_982439, EPI_ISL_982440, EPI_ISL_982441, EPI_ISL_982442, EPI_ISL_982443, EPI_ISL_982444, EPI_ISL_982445, EPI_ISL_982446, EPI_ISL_982447, EPI_ISL_982448, EPI_ISL_982449, EPI_ISL_982450, EPI_ISL_982451, EPI_ISL_982452, EPI_ISL_982453, EPI_ISL_982454, EPI_ISL_982455, EPI_ISL_982456, EPI_ISL_982457, EPI_ISL_982458, EPI_ISL_982459, EPI_ISL_982460, EPI_ISL_982461, EPI_ISL_982462, EPI_ISL_982463, EPI_ISL_982464, EPI_ISL_982465, EPI_ISL_982466, EPI_ISL_982467, EPI_ISL_982468, EPI_ISL_982469, EPI_ISL_982470, EPI_ISL_982471, EPI_ISL_982472, EPI_ISL_982473, EPI_ISL_982474, EPI_ISL_982475, EPI_ISL_982476, EPI_ISL_982477, EPI_ISL_982478, EPI_ISL_982479, EPI_ISL_982480, EPI_ISL_982481, EPI_ISL_982482, EPI_ISL_982483, EPI_ISL_982484, EPI_ISL_982485, EPI_ISL_982486, EPI_ISL_982487, EPI_ISL_982488, EPI_ISL_982489, EPI_ISL_982490, EPI_ISL_982491, EPI_ISL_982492, EPI_ISL_982493, EPI_ISL_982494, EPI_ISL_982495, EPI_ISL_982496, EPI_ISL_982497, EPI_ISL_982498 |                                        |                                                                                                    |                                                                                                                                                                                                                                                                                                                                                                                                                                                                                                                                                              |
| see above                                                                                                                                                                                                                                                                                                                                                                                                                                                                                                                                                                                                                                                                                                                                                                                                                                                                                                                                                                                                                                                                                                                                                                                                                      | MONTEFIORE MEDICAL CENTER LABORATORIES | Wadsworth Center, New York State Department of Health                                              | Kirsten St. George, Daryl M. Lamson, Alexis Russel, Matthew Shudt, Melissa A Leisner, Jonathan Plitnick, Navjot Singh, John Kelly, Erasmus Schneider, Erica Lasek-Nesselquist                                                                                                                                                                                                                                                                                                                                                                                |
| EPI_ISL_982499, EPI_ISL_982500, EPI_ISL_982501, EPI_ISL_982502, EPI_ISL_982503, EPI_ISL_982504                                                                                                                                                                                                                                                                                                                                                                                                                                                                                                                                                                                                                                                                                                                                                                                                                                                                                                                                                                                                                                                                                                                                 | ADIRONDACK MEDICAL CENTER              | Wadsworth Center, New York State Department of Health                                              | Kirsten St. George, Daryl M. Lamson, Alexis Russel, Matthew Shudt, Melissa A Leisner, Jonathan Plitnick, Navjot Singh, John Kelly, Erasmus Schneider, Erica Lasek-Nesselquist                                                                                                                                                                                                                                                                                                                                                                                |
| EPI_ISL_983099, EPI_ISL_983100, EPI_ISL_983101, EPI_ISL_983102, EPI_ISL_983103, EPI_ISL_983104, EPI_ISL_983105, EPI_ISL_983106, EPI_ISL_983107, EPI_ISL_983108, EPI_ISL_983109, EPI_ISL_983110, EPI_ISL_983111, EPI_ISL_983112, EPI_ISL_983113, EPI_ISL_983114, EPI_ISL_983115                                                                                                                                                                                                                                                                                                                                                                                                                                                                                                                                                                                                                                                                                                                                                                                                                                                                                                                                                 |                                        |                                                                                                    |                                                                                                                                                                                                                                                                                                                                                                                                                                                                                                                                                              |
| see above                                                                                                                                                                                                                                                                                                                                                                                                                                                                                                                                                                                                                                                                                                                                                                                                                                                                                                                                                                                                                                                                                                                                                                                                                      | MONTEFIORE MEDICAL CENTER LABORATORIES | Wadsworth Center, New York State Department of Health                                              | Kirsten St. George, Daryl M. Lamson, Alexis Russel, Matthew Shudt, Melissa A Leisner, Jonathan Plitnick, Navjot Singh, John Kelly, Erasmus Schneider, Erica Lasek-Nesselquist                                                                                                                                                                                                                                                                                                                                                                                |
| EPI_ISL_983116, EPI_ISL_983117, EPI_ISL_983118                                                                                                                                                                                                                                                                                                                                                                                                                                                                                                                                                                                                                                                                                                                                                                                                                                                                                                                                                                                                                                                                                                                                                                                 | SUNY UPSTATE MEDICAL UNIVERSITY        | Wadsworth Center, New York State Department of Health                                              | Kirsten St. George, Daryl M. Lamson, Alexis Russel, Matthew Shudt, Melissa A Leisner, Jonathan Plitnick, Navjot Singh, John Kelly, Erasmus Schneider, Erica Lasek-Nesselquist                                                                                                                                                                                                                                                                                                                                                                                |
| EPI_ISL_983119, EPI_ISL_983120, EPI_ISL_983121, EPI_ISL_983122, EPI_ISL_983123, EPI_ISL_983124, EPI_ISL_983125, EPI_ISL_983126, EPI_ISL_983127, EPI_ISL_983128, EPI_ISL_983129, EPI_ISL_983130, EPI_ISL_983131                                                                                                                                                                                                                                                                                                                                                                                                                                                                                                                                                                                                                                                                                                                                                                                                                                                                                                                                                                                                                 |                                        |                                                                                                    |                                                                                                                                                                                                                                                                                                                                                                                                                                                                                                                                                              |
| see above                                                                                                                                                                                                                                                                                                                                                                                                                                                                                                                                                                                                                                                                                                                                                                                                                                                                                                                                                                                                                                                                                                                                                                                                                      | THE MARY IMOGENE BASSETT HOSPITAL      | Wadsworth Center, New York State Department of Health                                              | Kirsten St. George, Daryl M. Lamson, Alexis Russel, Matthew Shudt, Melissa A Leisner, Jonathan Plitnick, Navjot Singh, John Kelly, Erasmus Schneider, Erica Lasek-Nesselquist                                                                                                                                                                                                                                                                                                                                                                                |
| EPI_ISL_983132, EPI_ISL_983133, EPI_ISL_983134, EPI_ISL_983135, EPI_ISL_983136, EPI_ISL_983137, EPI_ISL_983138, EPI_ISL_983139, EPI_ISL_983140, EPI_ISL_983141, EPI_ISL_983142, EPI_ISL_983143, EPI_ISL_983144, EPI_ISL_983145, EPI_ISL_983146, EPI_ISL_983147, EPI_ISL_983148, EPI_ISL_983149, EPI_ISL_983150, EPI_ISL_983151, EPI_ISL_983152, EPI_ISL_983153, EPI_ISL_983154, EPI_ISL_983155, EPI_ISL_983156, EPI_ISL_983157, EPI_ISL_983158, EPI_ISL_983159, EPI_ISL_983160, EPI_ISL_983161, EPI_ISL_983162, EPI_ISL_983163, EPI_ISL_983164, EPI_ISL_983165, EPI_ISL_983166, EPI_ISL_983167, EPI_ISL_983168, EPI_ISL_983169, EPI_ISL_983170                                                                                                                                                                                                                                                                                                                                                                                                                                                                                                                                                                                 |                                        |                                                                                                    |                                                                                                                                                                                                                                                                                                                                                                                                                                                                                                                                                              |
| see above                                                                                                                                                                                                                                                                                                                                                                                                                                                                                                                                                                                                                                                                                                                                                                                                                                                                                                                                                                                                                                                                                                                                                                                                                      | MONTEFIORE MEDICAL CENTER LABORATORIES | Wadsworth Center, New York State Department of Health                                              | Kirsten St. George, Daryl M. Lamson, Alexis Russel, Matthew Shudt, Melissa A Leisner, Jonathan Plitnick, Navjot Singh, John Kelly, Erasmus Schneider, Erica Lasek-Nesselquist                                                                                                                                                                                                                                                                                                                                                                                |
| EPI_ISL_983240, EPI_ISL_983241, EPI_ISL_983242                                                                                                                                                                                                                                                                                                                                                                                                                                                                                                                                                                                                                                                                                                                                                                                                                                                                                                                                                                                                                                                                                                                                                                                 | KALEIDA CENTER FOR LABORATORY MEDICINE | Wadsworth Center, New York State Department of Health                                              | Kirsten St. George, Daryl M. Lamson, Alexis Russel, Matthew Shudt, Melissa A Leisner, Jonathan Plitnick, Navjot Singh, John Kelly, Erasmus Schneider, Erica Lasek-Nesselquist                                                                                                                                                                                                                                                                                                                                                                                |
| EPI_ISL_983243                                                                                                                                                                                                                                                                                                                                                                                                                                                                                                                                                                                                                                                                                                                                                                                                                                                                                                                                                                                                                                                                                                                                                                                                                 | SUNY UPSTATE MEDICAL UNIVERSITY        | Wadsworth Center, New York State Department of Health                                              | Kirsten St. George, Daryl M. Lamson, Alexis Russel, Matthew Shudt, Melissa A Leisner, Jonathan Plitnick, Navjot Singh, John Kelly, Erasmus Schneider, Erica Lasek-Nesselquist                                                                                                                                                                                                                                                                                                                                                                                |
| EPI_ISL_983244                                                                                                                                                                                                                                                                                                                                                                                                                                                                                                                                                                                                                                                                                                                                                                                                                                                                                                                                                                                                                                                                                                                                                                                                                 | KALEIDA CENTER FOR LABORATORY MEDICINE | Wadsworth Center, New York State Department of Health                                              | Kirsten St. George, Daryl M. Lamson, Alexis Russel, Matthew Shudt, Melissa A Leisner, Jonathan Plitnick, Navjot Singh, John Kelly, Erasmus Schneider, Erica Lasek-Nesselquist                                                                                                                                                                                                                                                                                                                                                                                |
| EPI_ISL_983245                                                                                                                                                                                                                                                                                                                                                                                                                                                                                                                                                                                                                                                                                                                                                                                                                                                                                                                                                                                                                                                                                                                                                                                                                 | SUNY UPSTATE MEDICAL UNIVERSITY        | Wadsworth Center, New York State Department of Health                                              | Kirsten St. George, Daryl M. Lamson, Alexis Russel, Matthew Shudt, Melissa A Leisner, Jonathan Plitnick, Navjot Singh, John Kelly, Erasmus Schneider, Erica Lasek-Nesselquist                                                                                                                                                                                                                                                                                                                                                                                |
| EPI_ISL_983246, EPI_ISL_983247                                                                                                                                                                                                                                                                                                                                                                                                                                                                                                                                                                                                                                                                                                                                                                                                                                                                                                                                                                                                                                                                                                                                                                                                 | KALEIDA CENTER FOR LABORATORY MEDICINE | Wadsworth Center, New York State Department of Health                                              | Kirsten St. George, Daryl M. Lamson, Alexis Russel, Matthew Shudt, Melissa A Leisner, Jonathan Plitnick, Navjot Singh, John Kelly, Erasmus Schneider, Erica Lasek-Nesselquist                                                                                                                                                                                                                                                                                                                                                                                |
| EPI_ISL_983248, EPI_ISL_983249                                                                                                                                                                                                                                                                                                                                                                                                                                                                                                                                                                                                                                                                                                                                                                                                                                                                                                                                                                                                                                                                                                                                                                                                 | SUNY UPSTATE MEDICAL UNIVERSITY        | Wadsworth Center, New York State Department of Health                                              | Kirsten St. George, Daryl M. Lamson, Alexis Russel, Matthew Shudt, Melissa A Leisner, Jonathan Plitnick, Navjot Singh, John Kelly, Erasmus Schneider, Erica Lasek-Nesselquist                                                                                                                                                                                                                                                                                                                                                                                |
| EPI_ISL_983250, EPI_ISL_983251, EPI_ISL_983252, EPI_ISL_983253, EPI_ISL_983254, EPI_ISL_983255, EPI_ISL_983256, EPI_ISL_983257, EPI_ISL_983258, EPI_ISL_983259, EPI_ISL_983260, EPI_ISL_983261, EPI_ISL_983262, EPI_ISL_983263, EPI_ISL_983264, EPI_ISL_983265, EPI_ISL_983266, EPI_ISL_983267, EPI_ISL_983268, EPI_ISL_983269, EPI_ISL_983270, EPI_ISL_983271, EPI_ISL_983272, EPI_ISL_983273, EPI_ISL_983274, EPI_ISL_983275, EPI_ISL_983276, EPI_ISL_983277, EPI_ISL_983278, EPI_ISL_983279, EPI_ISL_983280, EPI_ISL_983281, EPI_ISL_983282                                                                                                                                                                                                                                                                                                                                                                                                                                                                                                                                                                                                                                                                                 |                                        |                                                                                                    |                                                                                                                                                                                                                                                                                                                                                                                                                                                                                                                                                              |
| see above                                                                                                                                                                                                                                                                                                                                                                                                                                                                                                                                                                                                                                                                                                                                                                                                                                                                                                                                                                                                                                                                                                                                                                                                                      | KALEIDA CENTER FOR LABORATORY MEDICINE | Wadsworth Center, New York State Department of Health                                              | Kirsten St. George, Daryl M. Lamson, Alexis Russel, Matthew Shudt, Melissa A Leisner, Jonathan Plitnick, Navjot Singh, John Kelly, Erasmus Schneider, Erica Lasek-Nesselquist                                                                                                                                                                                                                                                                                                                                                                                |
| EPI_ISL_983283                                                                                                                                                                                                                                                                                                                                                                                                                                                                                                                                                                                                                                                                                                                                                                                                                                                                                                                                                                                                                                                                                                                                                                                                                 | SUNY UPSTATE MEDICAL UNIVERSITY        | Wadsworth Center, New York State Department of Health                                              | Kirsten St. George, Daryl M. Lamson, Alexis Russel, Matthew Shudt, Melissa A Leisner, Jonathan Plitnick, Navjot Singh, John Kelly, Erasmus Schneider, Erica Lasek-Nesselquist                                                                                                                                                                                                                                                                                                                                                                                |
| EPI_ISL_983284, EPI_ISL_983285, EPI_ISL_983286, EPI_ISL_983287, EPI_ISL_983288                                                                                                                                                                                                                                                                                                                                                                                                                                                                                                                                                                                                                                                                                                                                                                                                                                                                                                                                                                                                                                                                                                                                                 | KALEIDA CENTER FOR LABORATORY MEDICINE | Wadsworth Center, New York State Department of Health                                              | Kirsten St. George, Daryl M. Lamson, Alexis Russel, Matthew Shudt, Melissa A Leisner, Jonathan Plitnick, Navjot Singh, John Kelly, Erasmus Schneider, Erica Lasek-Nesselquist                                                                                                                                                                                                                                                                                                                                                                                |
| EPI_ISL_983289, EPI_ISL_983290, EPI_ISL_983291, EPI_ISL_983292, EPI_ISL_983293, EPI_ISL_983294, EPI_ISL_983295                                                                                                                                                                                                                                                                                                                                                                                                                                                                                                                                                                                                                                                                                                                                                                                                                                                                                                                                                                                                                                                                                                                 | SUNY UPSTATE MEDICAL UNIVERSITY        | Wadsworth Center, New York State Department of Health                                              | Kirsten St. George, Daryl M. Lamson, Alexis Russel, Matthew Shudt, Melissa A Leisner, Jonathan Plitnick, Navjot Singh, John Kelly, Erasmus Schneider, Erica Lasek-Nesselquist                                                                                                                                                                                                                                                                                                                                                                                |
| EPI_ISL_983296, EPI_ISL_983297, EPI_ISL_983298, EPI_ISL_983299                                                                                                                                                                                                                                                                                                                                                                                                                                                                                                                                                                                                                                                                                                                                                                                                                                                                                                                                                                                                                                                                                                                                                                 | KALEIDA CENTER FOR LABORATORY MEDICINE | Wadsworth Center, New York State Department of Health                                              | Kirsten St. George, Daryl M. Lamson, Alexis Russel, Matthew Shudt, Melissa A Leisner, Jonathan Plitnick, Navjot Singh, John Kelly, Erasmus Schneider, Erica Lasek-Nesselquist                                                                                                                                                                                                                                                                                                                                                                                |
| EPI_ISL_983300, EPI_ISL_983301, EPI_ISL_983302, EPI_ISL_983303, EPI_ISL_983304, EPI_ISL_983305, EPI_ISL_983306, EPI_ISL_983307, EPI_ISL_983308, EPI_ISL_983309, EPI_ISL_983310, EPI_ISL_983311, EPI_ISL_983312, EPI_ISL_983313, EPI_ISL_983314, EPI_ISL_983315, EPI_ISL_983316, EPI_ISL_983317, EPI_ISL_983318, EPI_ISL_983319                                                                                                                                                                                                                                                                                                                                                                                                                                                                                                                                                                                                                                                                                                                                                                                                                                                                                                 |                                        |                                                                                                    |                                                                                                                                                                                                                                                                                                                                                                                                                                                                                                                                                              |
| see above                                                                                                                                                                                                                                                                                                                                                                                                                                                                                                                                                                                                                                                                                                                                                                                                                                                                                                                                                                                                                                                                                                                                                                                                                      | SUNY UPSTATE MEDICAL UNIVERSITY        | Wadsworth Center, New York State Department of Health                                              | Kirsten St. George, Daryl M. Lamson, Alexis Russel, Matthew Shudt, Melissa A Leisner, Jonathan Plitnick, Navjot Singh, John Kelly, Erasmus Schneider, Erica Lasek-Nesselquist                                                                                                                                                                                                                                                                                                                                                                                |
| EPI_ISL_983438, EPI_ISL_983439, EPI_ISL_983440, EPI_ISL_983441, EPI_ISL_983442, EPI_ISL_983443, EPI_ISL_983444                                                                                                                                                                                                                                                                                                                                                                                                                                                                                                                                                                                                                                                                                                                                                                                                                                                                                                                                                                                                                                                                                                                 | URMC LABS                              | Wadsworth Center, New York State Department of Health                                              | Kirsten St. George, Daryl M. Lamson, Alexis Russel, Matthew Shudt, Melissa A Leisner, Jonathan Plitnick, Navjot Singh, John Kelly, Erasmus Schneider, Erica Lasek-Nesselquist                                                                                                                                                                                                                                                                                                                                                                                |
| EPI_ISL_983445, EPI_ISL_983446                                                                                                                                                                                                                                                                                                                                                                                                                                                                                                                                                                                                                                                                                                                                                                                                                                                                                                                                                                                                                                                                                                                                                                                                 | THE MARY IMOGENE BASSETT HOSPITAL      | Wadsworth Center, New York State Department of Health                                              | Kirsten St. George, Daryl M. Lamson, Alexis Russel, Matthew Shudt, Melissa A Leisner, Jonathan Plitnick, Navjot Singh, John Kelly, Erasmus Schneider, Erica Lasek-Nesselquist                                                                                                                                                                                                                                                                                                                                                                                |
| EPI_ISL_983447, EPI_ISL_983448, EPI_ISL_983449, EPI_ISL_983450, EPI_ISL_983451, EPI_ISL_983452, EPI_ISL_983453, EPI_ISL_983454, EPI_ISL_983455, EPI_ISL_983456, EPI_ISL_983457, EPI_ISL_983458, EPI_ISL_983459, EPI_ISL_983460, EPI_ISL_983461, EPI_ISL_983462, EPI_ISL_983463, EPI_ISL_983464, EPI_ISL_983465, EPI_ISL_983466, EPI_ISL_983467, EPI_ISL_983468, EPI_ISL_983469, EPI_ISL_983470, EPI_ISL_983471, EPI_ISL_983472, EPI_ISL_983473, EPI_ISL_983474, EPI_ISL_983475                                                                                                                                                                                                                                                                                                                                                                                                                                                                                                                                                                                                                                                                                                                                                 |                                        |                                                                                                    |                                                                                                                                                                                                                                                                                                                                                                                                                                                                                                                                                              |
