# Supplementary material for: Detection and characterization of the SARS-CoV-2 lineage B.1.526 in New York
Source: bioRxiv or medRxiv preprint supplement (doi:10.1101/2021.02.14.431043), 2021-04-22
Supplement: Supplementary file [file media-1.pdf]

We gratefully acknowledge the following Authors from the Originating laboratories responsible for obtaining the specimens, as well as the Submitting laboratories where the genome data were generated and shared via GISAID, on which this research is based.

All Submitters of data may be contacted directly via [www.gisaid.org](http://www.gisaid.org)

Authors are sorted alphabetically.

| Accession ID                                                                                                                                                   | Originating Laboratory                                | Submitting Laboratory                                                                                                      | Authors                                                                                                                                                                                                                                                                                                                                                                                                                                                                                                                                                                         |
|----------------------------------------------------------------------------------------------------------------------------------------------------------------|-------------------------------------------------------|----------------------------------------------------------------------------------------------------------------------------|---------------------------------------------------------------------------------------------------------------------------------------------------------------------------------------------------------------------------------------------------------------------------------------------------------------------------------------------------------------------------------------------------------------------------------------------------------------------------------------------------------------------------------------------------------------------------------|
| EPI_ISL_683762                                                                                                                                                 | DOHMH Morrisania                                      | New York City Public Health Laboratory                                                                                     | Jade Wang, et al.                                                                                                                                                                                                                                                                                                                                                                                                                                                                                                                                                               |
| EPI_ISL_765493, EPI_ISL_765494, EPI_ISL_765495                                                                                                                 | MONTEFIORE MEDICAL CENTER LABORATORIES                | Wadsworth Center, New York State Department of Health                                                                      | Kirsten St. George, Daryl M. Lamson, Alexis Russel, Matthew Shudt, Melissa A Leisner, Jonathan Plitnick, Navjot Singh, John Kelly, Sara Griesemer, Erasmus Schneider, Erica Lasek-Nesselquist                                                                                                                                                                                                                                                                                                                                                                                   |
| EPI_ISL_767595, EPI_ISL_767598                                                                                                                                 | WHITE PLAINS HOSPITAL CENTER LABORATORY               | Wadsworth Center, New York State Department of Health                                                                      | Kirsten St. George, Daryl M. Lamson, Alexis Russel, Matthew Shudt, Melissa A Leisner, Jonathan Plitnick, Navjot Singh, John Kelly, Sara Griesemer, Erasmus Schneider, Erica Lasek-Nesselquist                                                                                                                                                                                                                                                                                                                                                                                   |
| EPI_ISL_794226, EPI_ISL_802448                                                                                                                                 | WESTCHESTER MEDICAL CENTER                            | Wadsworth Center, New York State Department of Health                                                                      | Kirsten St. George, Daryl M. Lamson, Alexis Russel, Matthew Shudt, Melissa A Leisner, Jonathan Plitnick, Navjot Singh, John Kelly, Sara Griesemer, Erasmus Schneider, Erica Lasek-Nesselquist                                                                                                                                                                                                                                                                                                                                                                                   |
| EPI_ISL_802788                                                                                                                                                 | Columbia University Irving Medical Center             | Wadsworth Center, New York State Department of Health                                                                      | Kirsten St. George, Daryl M. Lamson, Alexis Russel, Matthew Shudt, Melissa A Leisner, Jonathan Plitnick, Navjot Singh, John Kelly, Sara Griesemer, Erasmus Schneider, Erica Lasek-Nesselquist                                                                                                                                                                                                                                                                                                                                                                                   |
| EPI_ISL_812733                                                                                                                                                 | DOHMH Corona                                          | New York City Public Health Laboratory                                                                                     | Jade Wang, et al.                                                                                                                                                                                                                                                                                                                                                                                                                                                                                                                                                               |
| EPI_ISL_823886                                                                                                                                                 | DOHMH Central Harlem                                  | New York City Public Health Laboratory                                                                                     | Jade Wang, et al.                                                                                                                                                                                                                                                                                                                                                                                                                                                                                                                                                               |
| EPI_ISL_830577, EPI_ISL_830578                                                                                                                                 | NORTHWELL HEALTH LABORATORIES                         | Wadsworth Center, New York State Department of Health                                                                      | Kirsten St. George, Daryl M. Lamson, Alexis Russel, Matthew Shudt, Melissa A Leisner, Jonathan Plitnick, Navjot Singh, John Kelly, Erasmus Schneider, Erica Lasek-Nesselquist                                                                                                                                                                                                                                                                                                                                                                                                   |
| EPI_ISL_830720                                                                                                                                                 | BIO-REFERENCE LABORATORIES                            | Wadsworth Center, New York State Department of Health                                                                      | Kirsten St. George, Daryl M. Lamson, Alexis Russel, Matthew Shudt, Melissa A Leisner, Jonathan Plitnick, Navjot Singh, John Kelly, Erasmus Schneider, Erica Lasek-Nesselquist                                                                                                                                                                                                                                                                                                                                                                                                   |
| EPI_ISL_832270, EPI_ISL_832271                                                                                                                                 | DOHMH Riverside                                       | New York City Public Health Laboratory                                                                                     | Jade Wang, et al.                                                                                                                                                                                                                                                                                                                                                                                                                                                                                                                                                               |
| EPI_ISL_849348                                                                                                                                                 | Delaware Public Health Lab                            | Delaware Public Health Lab                                                                                                 | Gregory Hovan                                                                                                                                                                                                                                                                                                                                                                                                                                                                                                                                                                   |
| EPI_ISL_850743                                                                                                                                                 | Helix / Illumina                                      | Genomics and Discovery, Respiratory Viruses Branch, Division of Viral Diseases, Centers for Disease Control and Prevention | Peter W. Cook, Dhvani Batra, Ben L. Rambo-Martin Eileen de Feo, Jan Antico, Christine Tran, Matthew Tolentino, Shannon Wickline, Kim Getzgen, Brad Sickler, Jingtao Liu, Eric Allen, Phil Febbo, Summer Galloway, Nicole L. Washington, Simon White, Geraint Levan, Kelly Schiabor Barrett, Elizabeth Cirulli, Alexandre Bolze, Ary Ascencio, Charlotte Rivera-Garcia, Ryan Cho, Jason Nguyen, Sherry Wang, Jimmy Ramirez, Tyler Cassens, Efen Sandoval, Magnus Isaksson, William Lee, David Becker, Marc Laurent, James Lu, Clinton R. Paden, Suixiang Tong, Duncan MacCannell |
| EPI_ISL_854449                                                                                                                                                 | WESTCHESTER MEDICAL CENTER                            | Wadsworth Center, New York State Department of Health                                                                      | Kirsten St. George, Daryl M. Lamson, Alexis Russel, Matthew Shudt, Melissa A Leisner, Jonathan Plitnick, Navjot Singh, John Kelly, Erasmus Schneider, Erica Lasek-Nesselquist                                                                                                                                                                                                                                                                                                                                                                                                   |
| EPI_ISL_854450, EPI_ISL_854457, EPI_ISL_854458, EPI_ISL_854459                                                                                                 | MONTEFIORE MEDICAL CENTER LABORATORIES                | Wadsworth Center, New York State Department of Health                                                                      | Kirsten St. George, Daryl M. Lamson, Alexis Russel, Matthew Shudt, Melissa A Leisner, Jonathan Plitnick, Navjot Singh, John Kelly, Erasmus Schneider, Erica Lasek-Nesselquist                                                                                                                                                                                                                                                                                                                                                                                                   |
| EPI_ISL_855171                                                                                                                                                 | Quest Diagnostics                                     | Quest Diagnostics                                                                                                          | Rosenthal,S.H., Gerasimova,A., Kagan,R.M., Anderson, B., Hua, M., Liu Y., Bernstein, L.E., Livingston, K.E., Perez, A., Shalhout, D.F., Shlyakhter, I.A., Owen, R., Tanpaiboon, P., Lacbawan, F.                                                                                                                                                                                                                                                                                                                                                                                |
| EPI_ISL_857056, EPI_ISL_857060                                                                                                                                 | OCME Office Of Chief Medical Examiner                 | New York City Public Health Laboratory                                                                                     | Jade Wang, et al.                                                                                                                                                                                                                                                                                                                                                                                                                                                                                                                                                               |
| EPI_ISL_857120, EPI_ISL_857163                                                                                                                                 | DOHMH Central Harlem                                  | New York City Public Health Laboratory                                                                                     | Jade Wang, et al.                                                                                                                                                                                                                                                                                                                                                                                                                                                                                                                                                               |
| EPI_ISL_857164                                                                                                                                                 | DOHMH Morrisania                                      | New York City Public Health Laboratory                                                                                     | Jade Wang, et al.                                                                                                                                                                                                                                                                                                                                                                                                                                                                                                                                                               |
| EPI_ISL_857204                                                                                                                                                 | DOHMH Central Harlem                                  | New York City Public Health Laboratory                                                                                     | Jade Wang, et al.                                                                                                                                                                                                                                                                                                                                                                                                                                                                                                                                                               |
| EPI_ISL_861111, EPI_ISL_861112, EPI_ISL_861113                                                                                                                 | New York Presbyterian Hospital                        | Wadsworth Center, New York State Department of Health                                                                      | Kirsten St. George, Daryl M. Lamson, Alexis Russel, Matthew Shudt, Melissa A Leisner, Jonathan Plitnick, Navjot Singh, John Kelly, Erasmus Schneider, Erica Lasek-Nesselquist                                                                                                                                                                                                                                                                                                                                                                                                   |
| EPI_ISL_861175                                                                                                                                                 | BIO-REFERENCE LABORATORIES                            | Wadsworth Center, New York State Department of Health                                                                      | Kirsten St. George, Daryl M. Lamson, Alexis Russel, Matthew Shudt, Melissa A Leisner, Jonathan Plitnick, Navjot Singh, John Kelly, Erasmus Schneider, Erica Lasek-Nesselquist                                                                                                                                                                                                                                                                                                                                                                                                   |
| EPI_ISL_861188, EPI_ISL_861189                                                                                                                                 | NORTH SHORE UNIVERSITY HOSPITAL                       | Wadsworth Center, New York State Department of Health                                                                      | Kirsten St. George, Daryl M. Lamson, Alexis Russel, Matthew Shudt, Melissa A Leisner, Jonathan Plitnick, Navjot Singh, John Kelly, Erasmus Schneider, Erica Lasek-Nesselquist                                                                                                                                                                                                                                                                                                                                                                                                   |
| EPI_ISL_861244, EPI_ISL_861258, EPI_ISL_861278, EPI_ISL_861280, EPI_ISL_861283, EPI_ISL_861285, EPI_ISL_861300, EPI_ISL_861306, EPI_ISL_861308, EPI_ISL_861315 | MONTEFIORE MEDICAL CENTER LABORATORIES                | Wadsworth Center, New York State Department of Health                                                                      | Kirsten St. George, Daryl M. Lamson, Alexis Russel, Matthew Shudt, Melissa A Leisner, Jonathan Plitnick, Navjot Singh, John Kelly, Erasmus Schneider, Erica Lasek-Nesselquist                                                                                                                                                                                                                                                                                                                                                                                                   |
| EPI_ISL_861361, EPI_ISL_861411                                                                                                                                 | WESTCHESTER MEDICAL CENTER                            | Wadsworth Center, New York State Department of Health                                                                      | Kirsten St. George, Daryl M. Lamson, Alexis Russel, Matthew Shudt, Melissa A Leisner, Jonathan Plitnick, Navjot Singh, John Kelly, Erasmus Schneider, Erica Lasek-Nesselquist                                                                                                                                                                                                                                                                                                                                                                                                   |
| EPI_ISL_883330                                                                                                                                                 | OCME Office Of Chief Medical Examiner                 | New York City Public Health Laboratory                                                                                     | Jade Wang, et al.                                                                                                                                                                                                                                                                                                                                                                                                                                                                                                                                                               |
| EPI_ISL_883331, EPI_ISL_883338                                                                                                                                 | DOHMH Morrisania                                      | New York City Public Health Laboratory                                                                                     | Jade Wang, et al.                                                                                                                                                                                                                                                                                                                                                                                                                                                                                                                                                               |
| EPI_ISL_883339                                                                                                                                                 | DOHMH Chelsea                                         | New York City Public Health Laboratory                                                                                     | Jade Wang, et al.                                                                                                                                                                                                                                                                                                                                                                                                                                                                                                                                                               |
| EPI_ISL_883340, EPI_ISL_883341, EPI_ISL_883342, EPI_ISL_883343                                                                                                 | DOHMH PHL                                             | New York City Public Health Laboratory                                                                                     | Jade Wang, et al.                                                                                                                                                                                                                                                                                                                                                                                                                                                                                                                                                               |
| EPI_ISL_883344, EPI_ISL_883345                                                                                                                                 | OCME Office Of Chief Medical Examiner                 | New York City Public Health Laboratory                                                                                     | Jade Wang, et al.                                                                                                                                                                                                                                                                                                                                                                                                                                                                                                                                                               |
| EPI_ISL_883346                                                                                                                                                 | DOHMH PHL                                             | New York City Public Health Laboratory                                                                                     | Jade Wang, et al.                                                                                                                                                                                                                                                                                                                                                                                                                                                                                                                                                               |
| EPI_ISL_883347                                                                                                                                                 | DOHMH Morrisania                                      | New York City Public Health Laboratory                                                                                     | Jade Wang, et al.                                                                                                                                                                                                                                                                                                                                                                                                                                                                                                                                                               |
| EPI_ISL_883447                                                                                                                                                 | NORTHWELL HEALTH LABORATORIES                         | Wadsworth Center, New York State Department of Health                                                                      | Kirsten St. George, Daryl M. Lamson, Alexis Russel, Matthew Shudt, Melissa A Leisner, Jonathan Plitnick, Navjot Singh, John Kelly, Erasmus Schneider, Erica Lasek-Nesselquist                                                                                                                                                                                                                                                                                                                                                                                                   |
| EPI_ISL_884055, EPI_ISL_884080                                                                                                                                 | Wadsworth Center, New York State Department of Health | Wadsworth Center, New York State Department of Health                                                                      | Kirsten St. George, Daryl M. Lamson, Alexis Russel, Matthew Shudt, Melissa A Leisner, Jonathan Plitnick, Navjot Singh, John Kelly, Erasmus Schneider, Erica Lasek-Nesselquist                                                                                                                                                                                                                                                                                                                                                                                                   |
| EPI_ISL_886240, EPI_ISL_886270, EPI_ISL_886271, EPI_ISL_886384, EPI_ISL_886531, EPI_ISL_886626,                                                                | Labcorp                                               | Genomics and Discovery, Respiratory Viruses Branch, Division of Viral Diseases, Centers for Disease Control and Prevention | Peter W. Cook,Dhwani Batra,Ben L. Rambo-Martin,Summer Galloway,Brian Krueger,Minoo Agarwal,Eyad Almasri,Debbie Boles,Ayla Burns,Nuthawin Charoensri,Oren Cohen,Susan Countryman,Mary Ann Cristobal,Bobbi Croy,Suzanne Dale,Hrushikesh Deshmukh,Amanda Douglas,Vincent Drouillon,Marcia Eisenberg,Howard Engler,Rama Ghatti,Prashant Gupta,Susan Hicks,Jake Humphrey,Lax Iyer,Manoj Jain,Mohan Kolli,Tim Kuphal,Stanley                                                                                                                                                          |

|                                                                                                                                                                                                |                                                                                                                                  |                                                                               |                                                                                                                                                                                                                                                                                                                                                                                                                                                                                                 |
|------------------------------------------------------------------------------------------------------------------------------------------------------------------------------------------------|----------------------------------------------------------------------------------------------------------------------------------|-------------------------------------------------------------------------------|-------------------------------------------------------------------------------------------------------------------------------------------------------------------------------------------------------------------------------------------------------------------------------------------------------------------------------------------------------------------------------------------------------------------------------------------------------------------------------------------------|
| EPI_ISL_887843, EPI_ISL_888376                                                                                                                                                                 |                                                                                                                                  |                                                                               | Letovsky,Michael Levandoski,Craig Lukasuk,Jonathan Meltzer,Brian Norvell,Mindy Nye,Scott Parker,Christos Petropoulos,John Pruitt,Steven Ragan,Scott Ryan,Mike Sapeta,Jana Schroth,Suresh Babu Selvaraju,Goran Stevovic,Amanda Suchanek,Andrea Throop,Lyndon Tilson,Thomas Urban,Joe Voshell,Kimberly Wagner,Jonathan Williams,Mary Williamson,Qian Zeng,Tricia Zwiefelhofer,Clinton R. Paden,Suxiang Tong,Duncan MacCannell,                                                                    |
| EPI_ISL_896227, EPI_ISL_896233, EPI_ISL_896234, EPI_ISL_896391, EPI_ISL_896392, EPI_ISL_896394, EPI_ISL_896395                                                                                 | Columbia University Irving Medical Center                                                                                        | Wadsworth Center, New York State Department of Health                         | Kirsten St. George, Daryl M. Lamson, Alexis Russel, Matthew Shudt, Melissa A Leisner, Jonathan Plitnick, Navjot Singh, John Kelly, Erasmus Schneider, Erica Lasek-Nesselquist                                                                                                                                                                                                                                                                                                                   |
| EPI_ISL_906837, EPI_ISL_906838, EPI_ISL_906839                                                                                                                                                 | National Public Health Laboratory, National Centre for Infectious Diseases                                                       | National Public Health Laboratory, National Centre for Infectious Diseases    | Tze Minn Mak, Zhenyang Zhou, Lin Cui, Raymond Tzer Pin Lin                                                                                                                                                                                                                                                                                                                                                                                                                                      |
| EPI_ISL_911789                                                                                                                                                                                 | Johns Hopkins Hospital Department of Pathology                                                                                   | Johns Hopkins Hospital Department of Pathology                                | C. Paul Morris, Chun Huai Luo, Adannaya Amadi, Matthew Schwartz, Nicholas Gallagher, Heba H. Mostafa                                                                                                                                                                                                                                                                                                                                                                                            |
| EPI_ISL_920158                                                                                                                                                                                 | University College London, Great Ormond Street Hospital for Children NHS Foundation Trust, Imperial College Healthcare NHS Trust | COVID-19 Genomics UK (COG-UK) Consortium                                      | Sergi Castellano, Rachel Williams, Mark Kristiansen, Paola Resende Silva, Sunando Roy, Tony Brooks, Helena Tutill, Paola Niola, Patricia Dyal, Charlotte Williams, Leysa Forrest, Yasmin Panchbhaya, Jacqueline Findlay, Samuel Weeks, Julianne Brown, Kathryn Harris, Paul Randell, James Price, Alison Holmes, Judith Breuer                                                                                                                                                                  |
| EPI_ISL_936036, EPI_ISL_936038                                                                                                                                                                 | Columbia University Irving Medical Center                                                                                        | Wadsworth Center, New York State Department of Health                         | Kirsten St. George, Daryl M. Lamson, Alexis Russel, Matthew Shudt, Melissa A Leisner, Jonathan Plitnick, Navjot Singh, John Kelly, Erasmus Schneider, Erica Lasek-Nesselquist                                                                                                                                                                                                                                                                                                                   |
| EPI_ISL_936248, EPI_ISL_936254, EPI_ISL_936256, EPI_ISL_936261, EPI_ISL_936267, EPI_ISL_936271, EPI_ISL_936276, EPI_ISL_936281, EPI_ISL_936288, EPI_ISL_936291, EPI_ISL_936292, EPI_ISL_936299 |                                                                                                                                  |                                                                               |                                                                                                                                                                                                                                                                                                                                                                                                                                                                                                 |
| see above                                                                                                                                                                                      | MONTEFIORE MEDICAL CENTER LABORATORIES                                                                                           | Wadsworth Center, New York State Department of Health                         | Kirsten St. George, Daryl M. Lamson, Alexis Russel, Matthew Shudt, Melissa A Leisner, Jonathan Plitnick, Navjot Singh, John Kelly, Erasmus Schneider, Erica Lasek-Nesselquist                                                                                                                                                                                                                                                                                                                   |
| EPI_ISL_937126                                                                                                                                                                                 | DOHMH Riverside                                                                                                                  | New York City Public Health Laboratory                                        | Jade Wang, et al.                                                                                                                                                                                                                                                                                                                                                                                                                                                                               |
| EPI_ISL_937176                                                                                                                                                                                 | DOHMH Jamaica                                                                                                                    | New York City Public Health Laboratory                                        | Jade Wang, et al.                                                                                                                                                                                                                                                                                                                                                                                                                                                                               |
| EPI_ISL_937190                                                                                                                                                                                 | OCME Office Of Chief Medical Examiner                                                                                            | New York City Public Health Laboratory                                        | Jade Wang, et al.                                                                                                                                                                                                                                                                                                                                                                                                                                                                               |
| EPI_ISL_937191, EPI_ISL_937192                                                                                                                                                                 | Department of Homeless Services                                                                                                  | New York City Public Health Laboratory                                        | Jade Wang, et al.                                                                                                                                                                                                                                                                                                                                                                                                                                                                               |
| EPI_ISL_937201                                                                                                                                                                                 | DOHMH Fort Greene                                                                                                                | New York City Public Health Laboratory                                        | Jade Wang, et al.                                                                                                                                                                                                                                                                                                                                                                                                                                                                               |
| EPI_ISL_937205                                                                                                                                                                                 | DOHMH Central Harlem                                                                                                             | New York City Public Health Laboratory                                        | Jade Wang, et al.                                                                                                                                                                                                                                                                                                                                                                                                                                                                               |
| EPI_ISL_937211                                                                                                                                                                                 | DOHMH PHL                                                                                                                        | New York City Public Health Laboratory                                        | Jade Wang, et al.                                                                                                                                                                                                                                                                                                                                                                                                                                                                               |
| EPI_ISL_937213                                                                                                                                                                                 | DOHMH Jamaica                                                                                                                    | New York City Public Health Laboratory                                        | Jade Wang, et al.                                                                                                                                                                                                                                                                                                                                                                                                                                                                               |
| EPI_ISL_937215                                                                                                                                                                                 | DOHMH PHL                                                                                                                        | New York City Public Health Laboratory                                        | Jade Wang, et al.                                                                                                                                                                                                                                                                                                                                                                                                                                                                               |
| EPI_ISL_937216                                                                                                                                                                                 | DOHMH Central Harlem                                                                                                             | New York City Public Health Laboratory                                        | Jade Wang, et al.                                                                                                                                                                                                                                                                                                                                                                                                                                                                               |
| EPI_ISL_937218                                                                                                                                                                                 | DOHMH Chelsea                                                                                                                    | New York City Public Health Laboratory                                        | Jade Wang, et al.                                                                                                                                                                                                                                                                                                                                                                                                                                                                               |
| EPI_ISL_937236                                                                                                                                                                                 | DOHMH Morrisania                                                                                                                 | New York City Public Health Laboratory                                        | Jade Wang, et al.                                                                                                                                                                                                                                                                                                                                                                                                                                                                               |
| EPI_ISL_937246, EPI_ISL_937247, EPI_ISL_937255                                                                                                                                                 | OCME Office Of Chief Medical Examiner                                                                                            | New York City Public Health Laboratory                                        | Jade Wang, et al.                                                                                                                                                                                                                                                                                                                                                                                                                                                                               |
| EPI_ISL_937258, EPI_ISL_937265, EPI_ISL_937272                                                                                                                                                 | NYC HH Elmhurst Hospital Medical Center                                                                                          | New York City Public Health Laboratory                                        | Jade Wang, et al.                                                                                                                                                                                                                                                                                                                                                                                                                                                                               |
| EPI_ISL_937477                                                                                                                                                                                 | Maine Health and Environmental Testing Laboratory (Maine HETL)                                                                   | Tewhey Lab, The Jackson Laboratory                                            | Matluk,N., Dewey,H., Iosue,F., Barter,M., Lynch,R., Munger,H. and Tewhey,R.                                                                                                                                                                                                                                                                                                                                                                                                                     |
| EPI_ISL_944591, EPI_ISL_944592, EPI_ISL_944594                                                                                                                                                 | Yale Clinical Virology Lab                                                                                                       | Grubaugh Lab - Yale School of Public Health                                   | Joseph Fauver, Tara Alpert, Anderson Brito, Mallery Breban, Anne Wyllie, Chantal Vogels, Mary Petrone, Annie Watkins, Chaney Kalinich, Isabel Ott, Nathan Grubaugh                                                                                                                                                                                                                                                                                                                              |
| EPI_ISL_962431                                                                                                                                                                                 | Washington State Department of Health                                                                                            | Seattle Flu Study                                                             | Deborah A. Nickerson, Chris D. Frazar, Jover Lee, Benjamin Pelle, Erica Ryke, Matthew Richardson, Amanda Adler, Elisabeth Brandstetter, Peter D. Han, Kairsten Fay, Misja Ilcisin, Kirsten Lacombe, Thomas R. Sibley, Melissa Truong, Caitlin R. Wolf, Romesh Gautom, Geoff Melly, Brian Hiatt, Philip Dykema, Scott Lindquist, Michael Boeckh, Janet A. Englund, Michael Famulare, Barry R. Lutz, Mark J. Rieder, Lea M. Starita, Matthew Thompson, Helen Y. Chu, Jay Shendure, Trevor Bedford |
| EPI_ISL_962492, EPI_ISL_962493                                                                                                                                                                 | Omics Sciences Laboratory                                                                                                        | Omics Sciences Laboratory                                                     | Derly Andrade Molina, Rubén Armas González, Gabriel Morey León, Darlyn Amaya, Kathryn Sacheri Viteri, Emily Sulay Saitos Montalvo, Paula Juliana Gavilanes Jarrin, Juan Carlos Fernández Cadena                                                                                                                                                                                                                                                                                                 |
| EPI_ISL_966264                                                                                                                                                                                 | NYU Langone Health                                                                                                               | Departments of Pathology and Medicine, New York University School of Medicine | Adriana Heguy, Dacia Dimartino, Emily Guzman, Christian Marier, Peter Meyn, Sitharam Ramaswami, Gael Westby, Paul Zappile, Yutong Zhang, Paolo Cotzia, Guiqing Wang                                                                                                                                                                                                                                                                                                                             |
| EPI_ISL_966385                                                                                                                                                                                 | Department of Homeless Services                                                                                                  | New York City Public Health Laboratory                                        | Jade Wang, et al.                                                                                                                                                                                                                                                                                                                                                                                                                                                                               |
| EPI_ISL_966387                                                                                                                                                                                 | DOHMH Jamaica                                                                                                                    | New York City Public Health Laboratory                                        | Jade Wang, et al.                                                                                                                                                                                                                                                                                                                                                                                                                                                                               |
| EPI_ISL_966400                                                                                                                                                                                 | OCME Office Of Chief Medical Examiner                                                                                            | New York City Public Health Laboratory                                        | Jade Wang, et al.                                                                                                                                                                                                                                                                                                                                                                                                                                                                               |
| EPI_ISL_966401                                                                                                                                                                                 | Department of Homeless Services                                                                                                  | New York City Public Health Laboratory                                        | Jade Wang, et al.                                                                                                                                                                                                                                                                                                                                                                                                                                                                               |
| EPI_ISL_966411                                                                                                                                                                                 | OCME Office Of Chief Medical Examiner                                                                                            | New York City Public Health Laboratory                                        | Jade Wang, et al.                                                                                                                                                                                                                                                                                                                                                                                                                                                                               |
| EPI_ISL_966412                                                                                                                                                                                 | DOHMH Jamaica                                                                                                                    | New York City Public Health Laboratory                                        | Jade Wang, et al.                                                                                                                                                                                                                                                                                                                                                                                                                                                                               |
| EPI_ISL_966413                                                                                                                                                                                 | DOHMH Central Harlem                                                                                                             | New York City Public Health Laboratory                                        | Jade Wang, et al.                                                                                                                                                                                                                                                                                                                                                                                                                                                                               |
| EPI_ISL_966414                                                                                                                                                                                 | DOHMH Morrisania                                                                                                                 | New York City Public Health Laboratory                                        | Jade Wang, et al.                                                                                                                                                                                                                                                                                                                                                                                                                                                                               |
| EPI_ISL_966415                                                                                                                                                                                 | DOHMH Corona                                                                                                                     | New York City Public Health Laboratory                                        | Jade Wang, et al.                                                                                                                                                                                                                                                                                                                                                                                                                                                                               |
| EPI_ISL_966416                                                                                                                                                                                 | DOHMH Central Harlem                                                                                                             | New York City Public Health Laboratory                                        | Jade Wang, et al.                                                                                                                                                                                                                                                                                                                                                                                                                                                                               |
| EPI_ISL_966417, EPI_ISL_966418, EPI_ISL_966419                                                                                                                                                 | OCME Office Of Chief Medical Examiner                                                                                            | New York City Public Health Laboratory                                        | Jade Wang, et al.                                                                                                                                                                                                                                                                                                                                                                                                                                                                               |
| EPI_ISL_966420                                                                                                                                                                                 | DOHMH Morrisania                                                                                                                 | New York City Public Health Laboratory                                        | Jade Wang, et al.                                                                                                                                                                                                                                                                                                                                                                                                                                                                               |
| EPI_ISL_966421, EPI_ISL_966422                                                                                                                                                                 | DOHMH Jamaica                                                                                                                    | New York City Public Health Laboratory                                        | Jade Wang, et al.                                                                                                                                                                                                                                                                                                                                                                                                                                                                               |
| EPI_ISL_966423                                                                                                                                                                                 | DOHMH Morrisania                                                                                                                 | New York City Public Health Laboratory                                        | Jade Wang, et al.                                                                                                                                                                                                                                                                                                                                                                                                                                                                               |
| EPI_ISL_966424                                                                                                                                                                                 | DOHMH Jamaica                                                                                                                    | New York City Public Health Laboratory                                        | Jade Wang, et al.                                                                                                                                                                                                                                                                                                                                                                                                                                                                               |
| EPI_ISL_966425                                                                                                                                                                                 | DOHMH Corona                                                                                                                     | New York City Public Health Laboratory                                        | Jade Wang, et al.                                                                                                                                                                                                                                                                                                                                                                                                                                                                               |
| EPI_ISL_966426                                                                                                                                                                                 | DOHMH PHL                                                                                                                        | New York City Public Health Laboratory                                        | Jade Wang, et al.                                                                                                                                                                                                                                                                                                                                                                                                                                                                               |
| EPI_ISL_966427                                                                                                                                                                                 | OCME Office Of Chief Medical Examiner                                                                                            | New York City Public Health Laboratory                                        | Jade Wang, et al.                                                                                                                                                                                                                                                                                                                                                                                                                                                                               |
